# Supplementary material for: Insights into the role of the H-abstraction reaction kinetics of amines in understanding their degeneration fates under atmospheric and combustion conditions
Source: Royal Society of Chemistry journal article supplement (doi:10.1039/d4cp02187h), 2024-01-01
Supplement: d4cp02187h1.pdf [file d4cp02187h1.pdf]

Electronic Supplementary Information for:

**Insights into the H-abstraction reaction kinetics from amines in their  
degeneration fates under the atmospheric and combustion conditions**

Yanlei Shang <sup>a,b,c,\*</sup>, S. N. Luo <sup>b,c</sup>

<sup>a</sup> *Energy Research Institute, Qilu University of Technology (Shandong Academy of Sciences), Jinan, Shandong,  
250014, P. R. China*

<sup>b</sup> *School of Materials Science and Engineering, Southwest Jiaotong University, Chengdu, Sichuan, 610031, P.  
R. China*

<sup>c</sup> *Key Laboratory of Extreme Material Dynamics Technology, Chengdu, Sichuan 610031, P.R. China*

Corresponding author: ylshang@sderi.cn

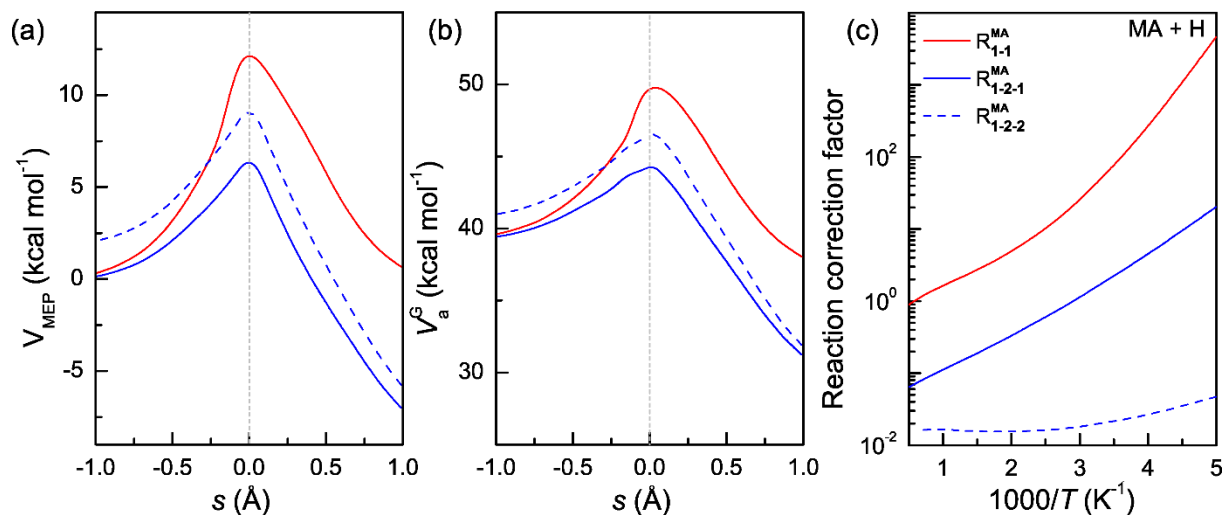

Figure S1. (a)  $V_{\text{MEP}}$ , (b)  $V_a^G$ , and reaction correction factor of each reaction path for the H-abstraction reactions from MA by H radicals.  $R_{1-1}^{\text{MA}}$  and  $R_{1-2}^{\text{MA}}$  have 1 and 2 reaction paths, respectively.

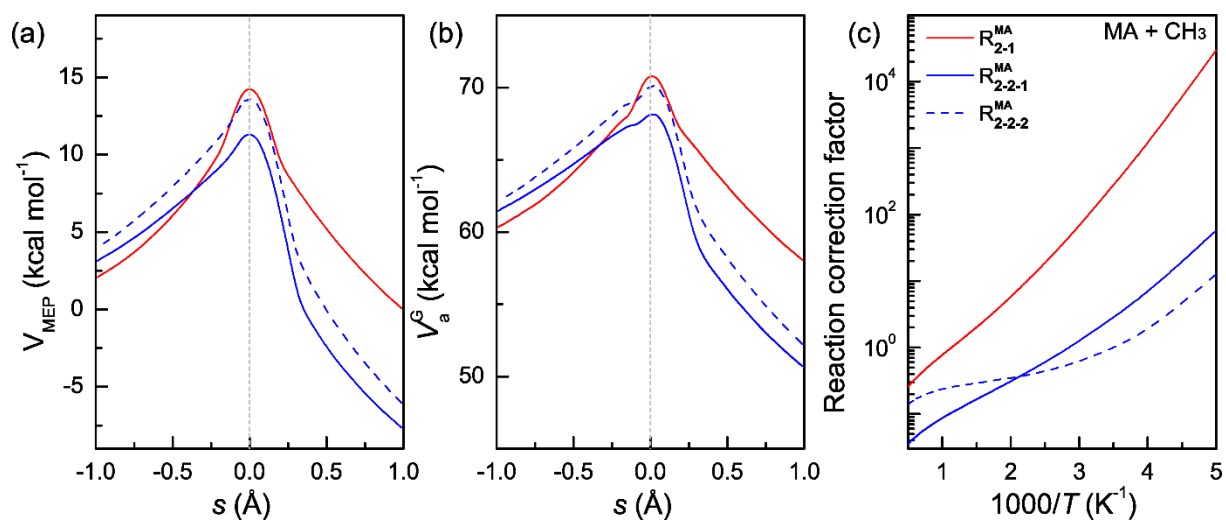

Figure S2. (a)  $V_{\text{MEP}}$ , (b)  $V_a^G$ , and reaction correction factor of each reaction path for the H-abstraction reactions from MA by  $\text{CH}_3$  radicals.  $R_{2-1}^{\text{MA}}$  and  $R_{2-2}^{\text{MA}}$  have 1 and 2 reaction paths, respectively.

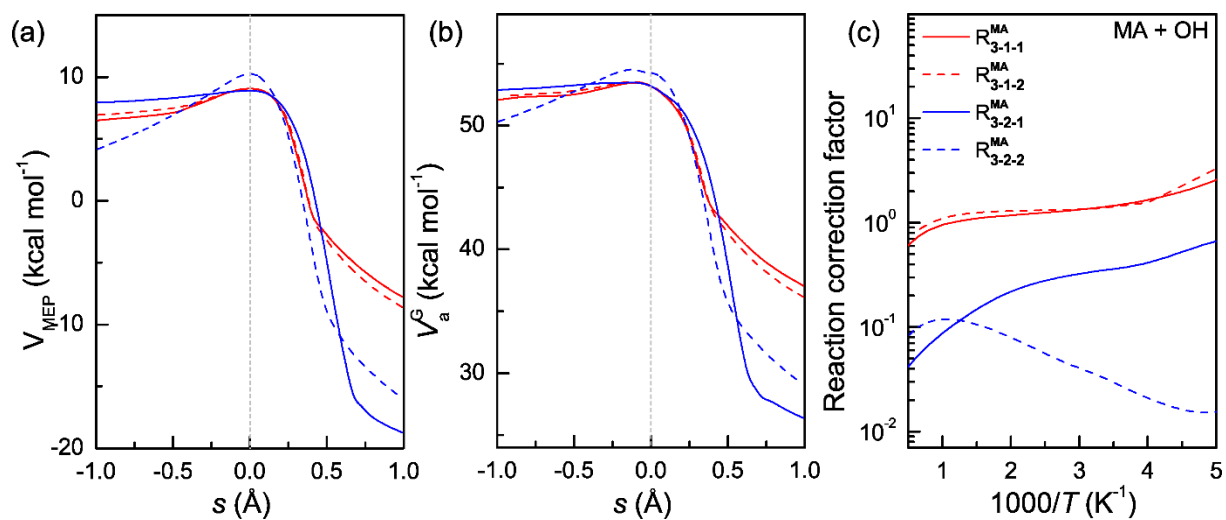

Figure S3. (a)  $V_{\text{MEP}}$ , (b)  $V_a^G$ , and reaction correction factor of each reaction path for the H-abstraction reactions from MA by OH radicals.  $R_{3-1}^{\text{MA}}$  and  $R_{3-2}^{\text{MA}}$  both have 2 reaction paths.

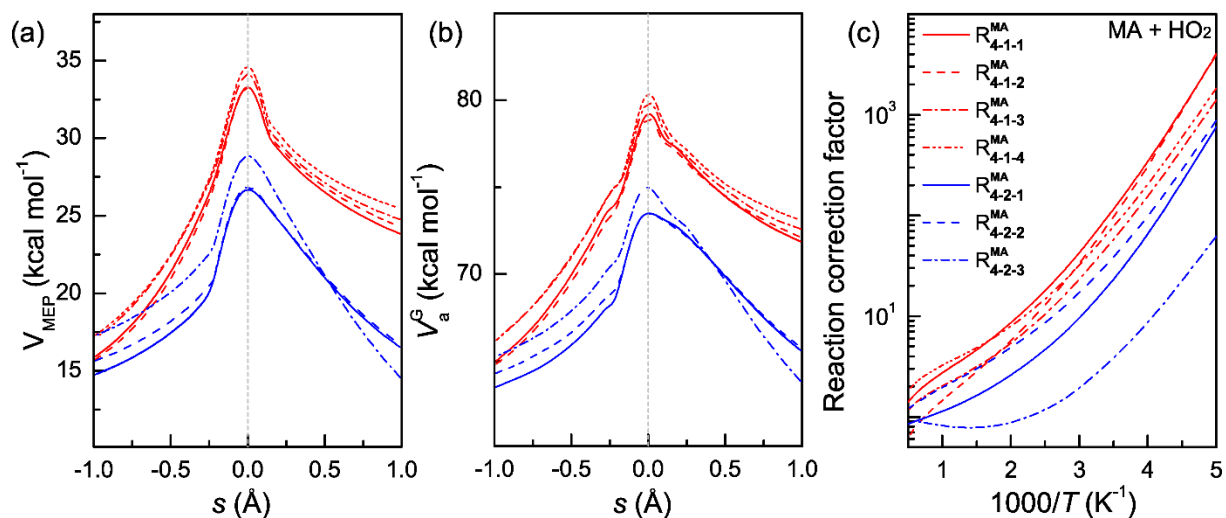

Figure S4. (a)  $V_{\text{MEP}}$ , (b)  $V_a^G$ , and reaction correction factor of each reaction path for the H-abstraction reactions from MA by HO<sub>2</sub> radicals.  $R_{4-1}^{\text{MA}}$  and  $R_{4-2}^{\text{MA}}$  have 4 and 3 reaction paths, respectively.

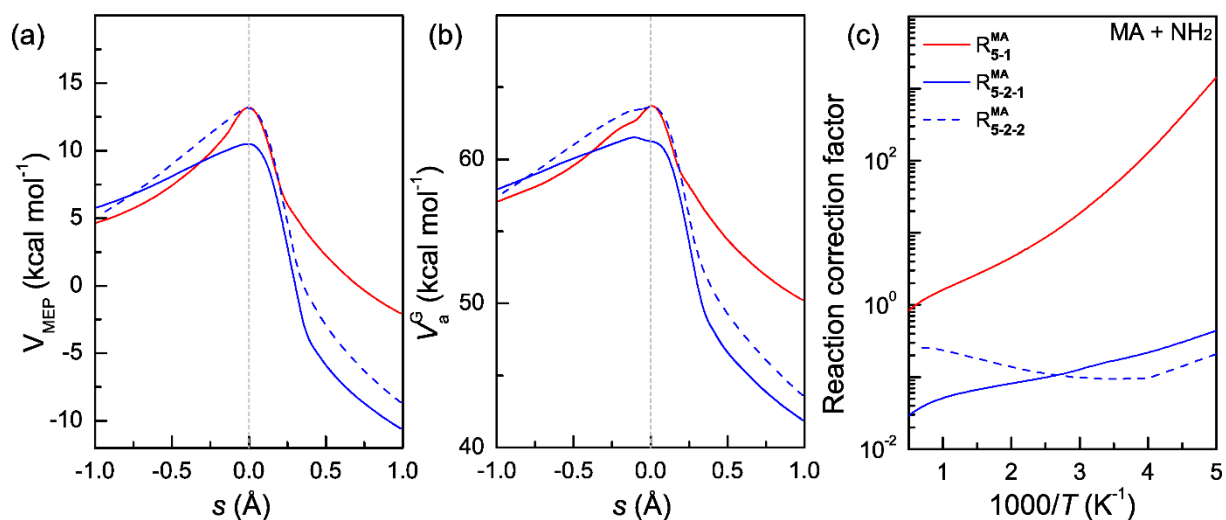

Figure S5. (a)  $V_{\text{MEP}}$ , (b)  $V_a^G$ , and reaction correction factor of each reaction path for the H-abstraction reactions from MA by NH<sub>2</sub> radicals.  $R_{5-1}^{\text{MA}}$  and  $R_{5-2}^{\text{MA}}$  have 1 and 2 reaction paths, respectively.

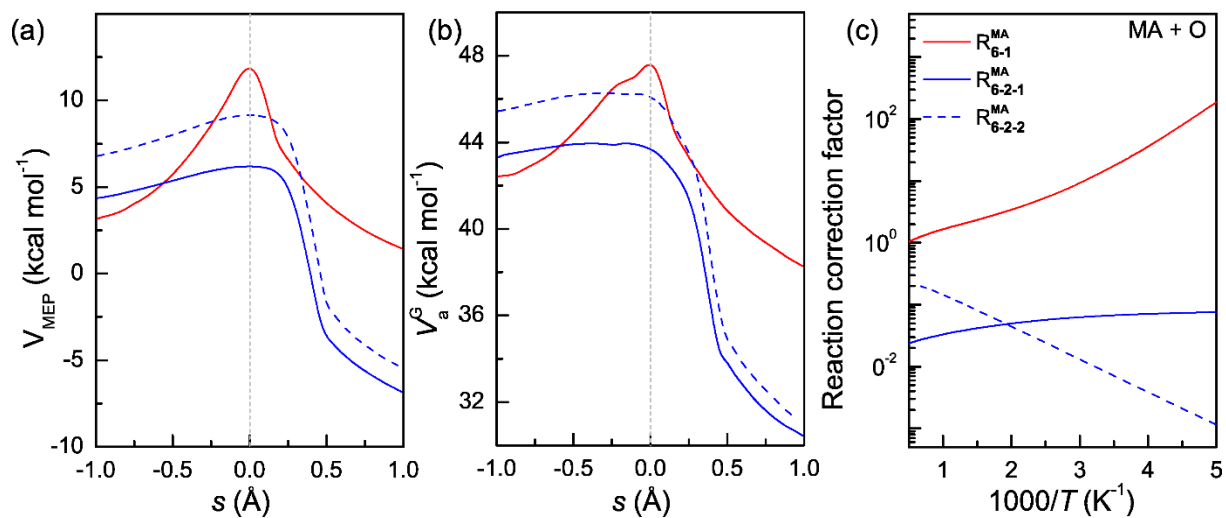

Figure S6. (a)  $V_{\text{MEP}}$ , (b)  $V_a^G$ , and reaction correction factor of each reaction path for the H-abstraction reactions from MA by O radicals.  $R_{6-1}^{\text{MA}}$  and  $R_{6-2}^{\text{MA}}$  have 1 and 2 reaction paths, respectively.

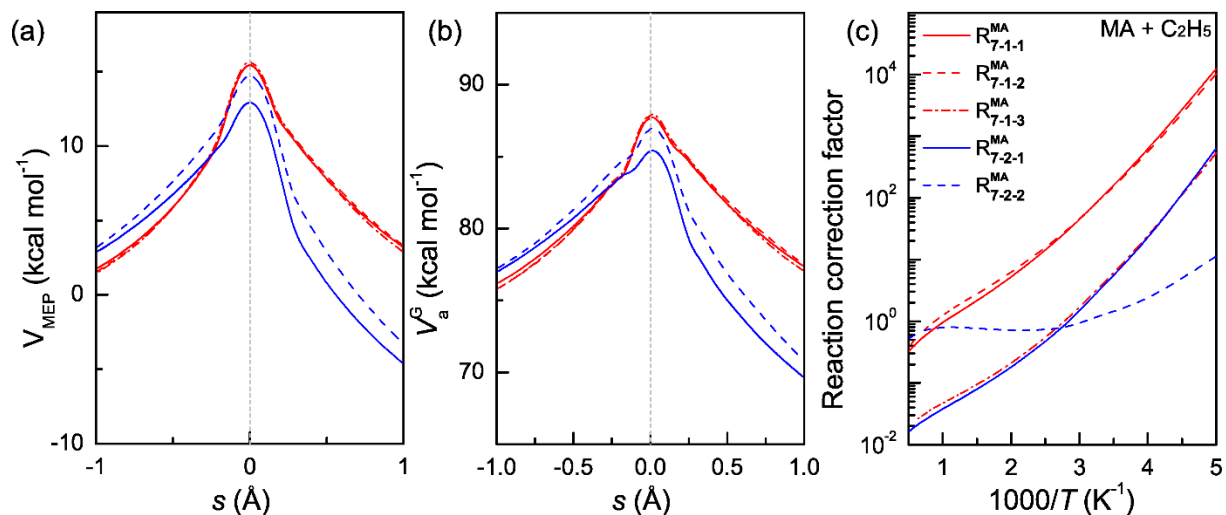

Figure S7. (a)  $V_{\text{MEP}}$ , (b)  $V_a^G$ , and reaction correction factor of each reaction path for the H-abstraction reactions from MA by C<sub>2</sub>H<sub>5</sub> radicals.  $R_{7-1}^{\text{MA}}$  and  $R_{7-2}^{\text{MA}}$  have 3 and 2 reaction paths, respectively.

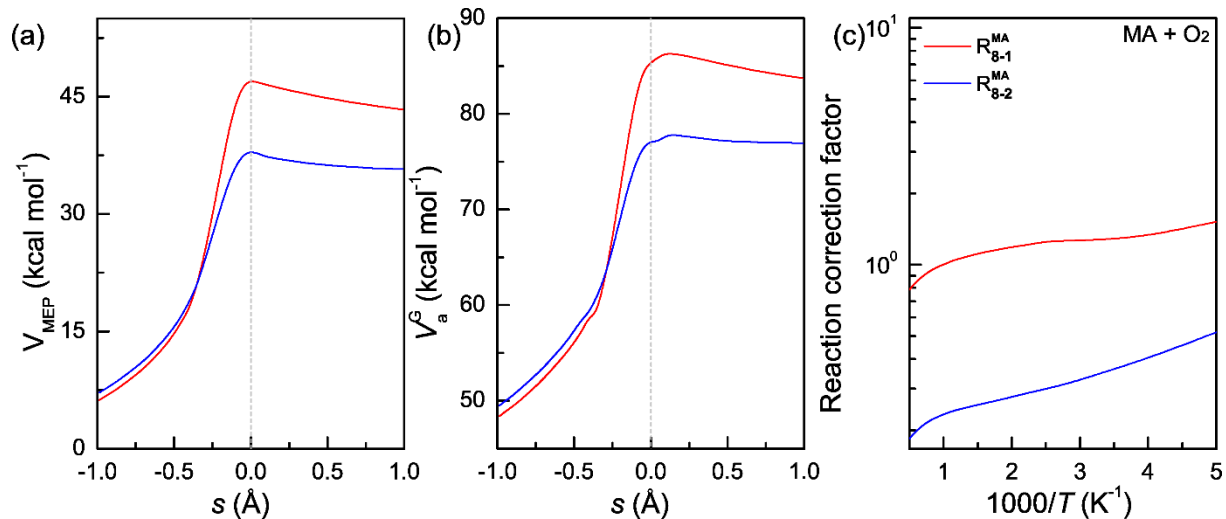

Figure S8. (a)  $V_{\text{MEP}}$ , (b)  $V_a^G$ , and reaction correction factor of each reaction path for the H-abstraction reactions from MA by O<sub>2</sub>.  $R_{8-1}^{\text{MA}}$  and  $R_{8-2}^{\text{MA}}$  both have 1 reaction path.

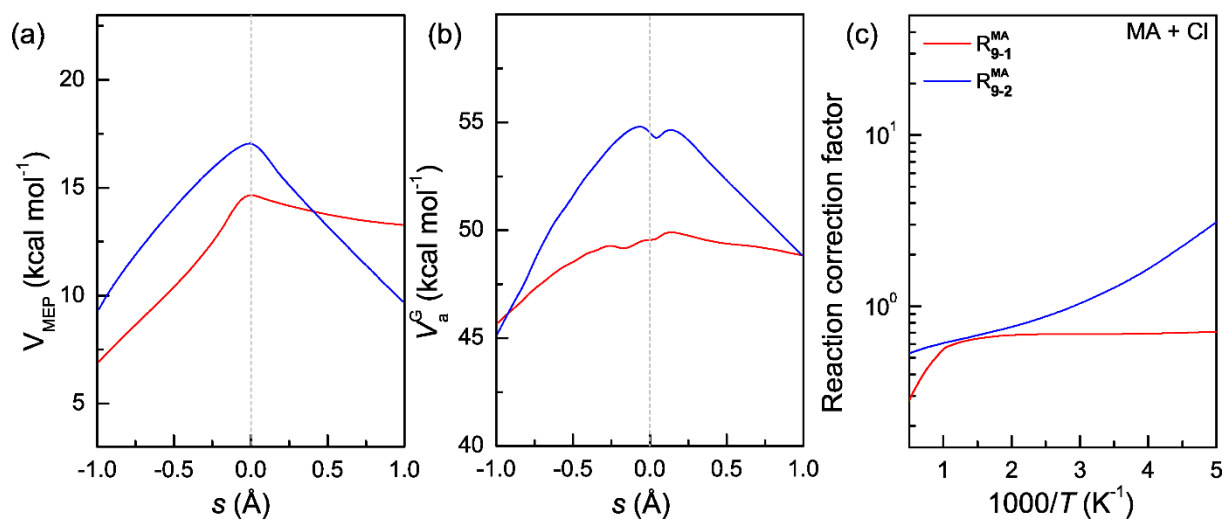

Figure S9. (a)  $V_{\text{MEP}}$ , (b)  $V_a^G$ , and reaction correction factor of each reaction path for the H-abstraction reactions from MA by Cl.  $R_{9-1}^{\text{MA}}$  and  $R_{9-2}^{\text{MA}}$  both have 1 reaction path.

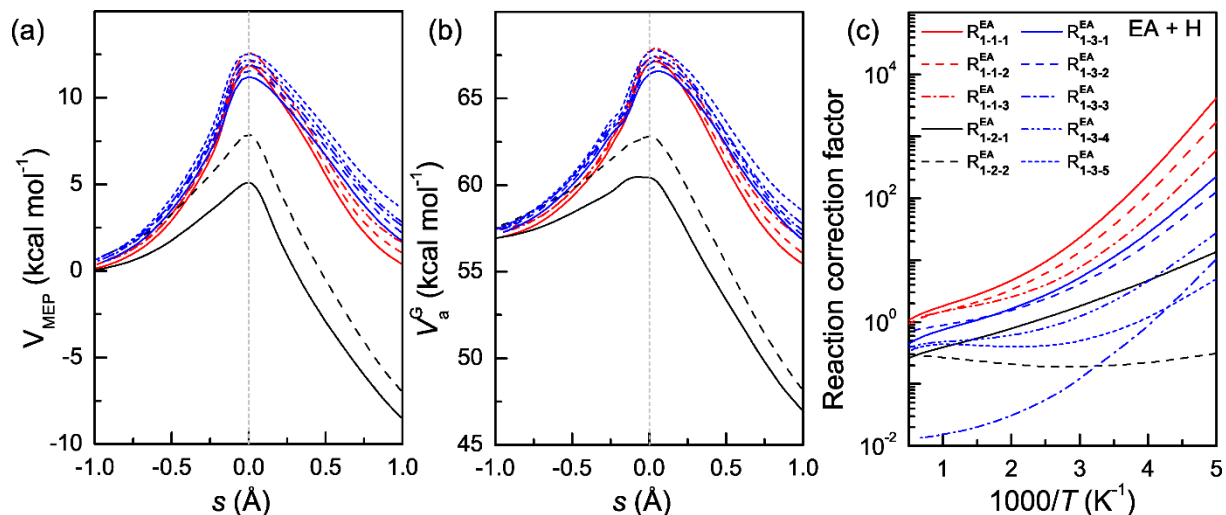

Figure S10. (a)  $V_{\text{MEP}}$ , (b)  $V_a^G$ , and reaction correction factor of each reaction path for the H-abstraction reactions from EA by H radicals.  $R_{1-1}^{\text{EA}}$ ,  $R_{1-2}^{\text{EA}}$ , and  $R_{1-3}^{\text{EA}}$  have 3, 2, and 5 reaction paths, respectively.

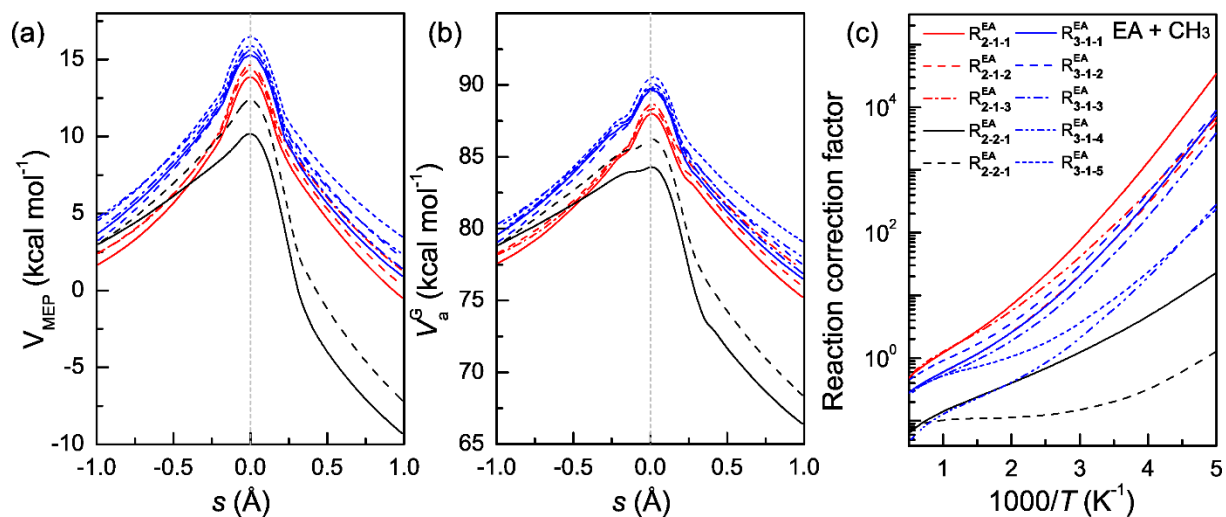

Figure S11. (a)  $V_{\text{MEP}}$ , (b)  $V_a^G$ , and reaction correction factor of each reaction path for the H-abstraction reactions from EA by CH<sub>3</sub> radicals.  $R_{2-1}^{\text{EA}}$ ,  $R_{2-2}^{\text{EA}}$ , and  $R_{2-3}^{\text{EA}}$  have 3, 2, and 5 reaction paths, respectively.

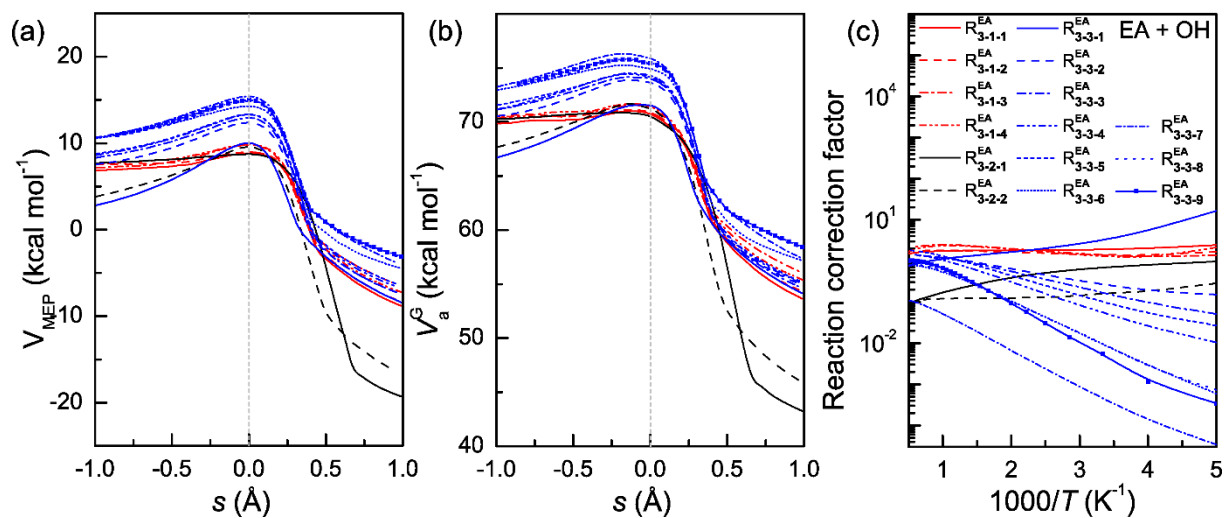

Figure S12. (a)  $V_{\text{MEP}}$ , (b)  $V_a^G$ , and reaction correction factor of each reaction path for the H-abstraction reactions from EA by OH radicals.  $R_{3-1}^{\text{EA}}$ ,  $R_{3-2}^{\text{EA}}$ , and  $R_{3-3}^{\text{EA}}$  have 4, 2, and 9 reaction paths, respectively.

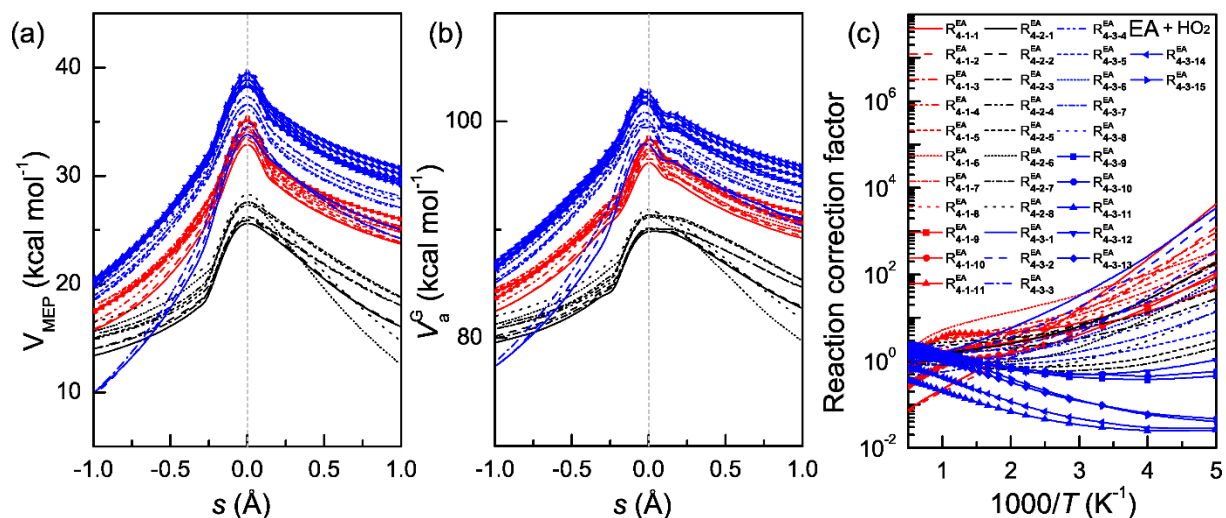

Figure S13. (a)  $V_{\text{MEP}}$ , (b)  $V_a^G$ , and reaction correction factor of each reaction path for the H-abstraction reactions from EA by HO<sub>2</sub> radicals. R<sub>4-1</sub><sup>EA</sup>, R<sub>4-2</sub><sup>EA</sup>, and R<sub>4-3</sub><sup>EA</sup> have 11, 8, and 13 reaction paths, respectively.

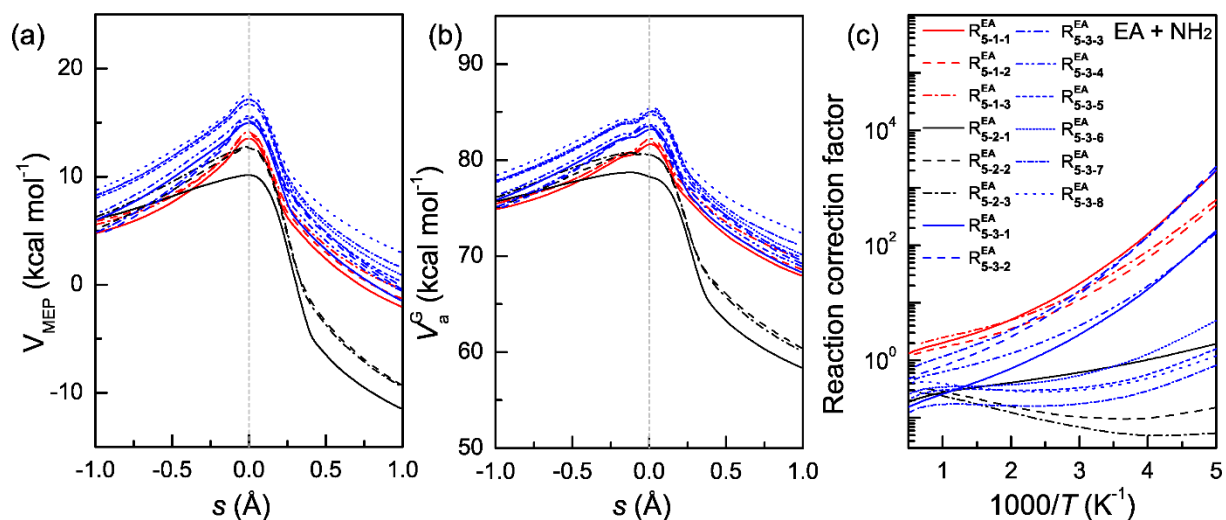

Figure S14. (a)  $V_{\text{MEP}}$ , (b)  $V_a^G$ , and reaction correction factor of each reaction path for the H-abstraction reactions from EA by NH<sub>2</sub> radicals. R<sub>5-1</sub><sup>EA</sup>, R<sub>5-2</sub><sup>EA</sup>, and R<sub>5-3</sub><sup>EA</sup> have 3, 3, and 8 reaction paths, respectively.

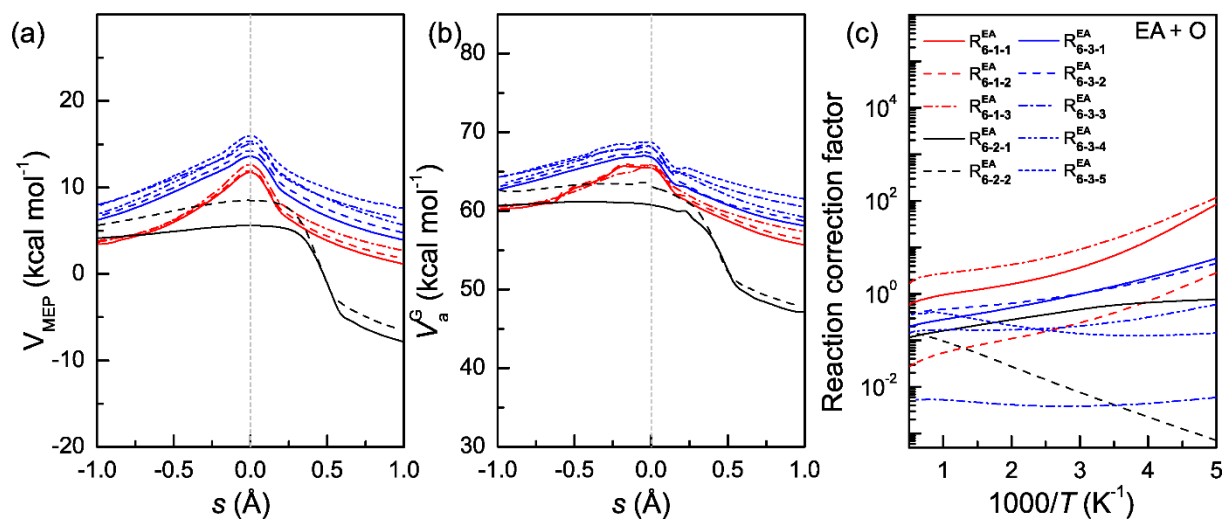

Figure S15. (a)  $V_{\text{MEP}}$ , (b)  $V_a^G$ , and reaction correction factor of each reaction path for the H-abstraction reactions from EA by O radicals. R<sub>6-1</sub><sup>EA</sup>, R<sub>6-2</sub><sup>EA</sup>, and R<sub>6-3</sub><sup>EA</sup> have 3, 2, and 5 reaction paths, respectively.

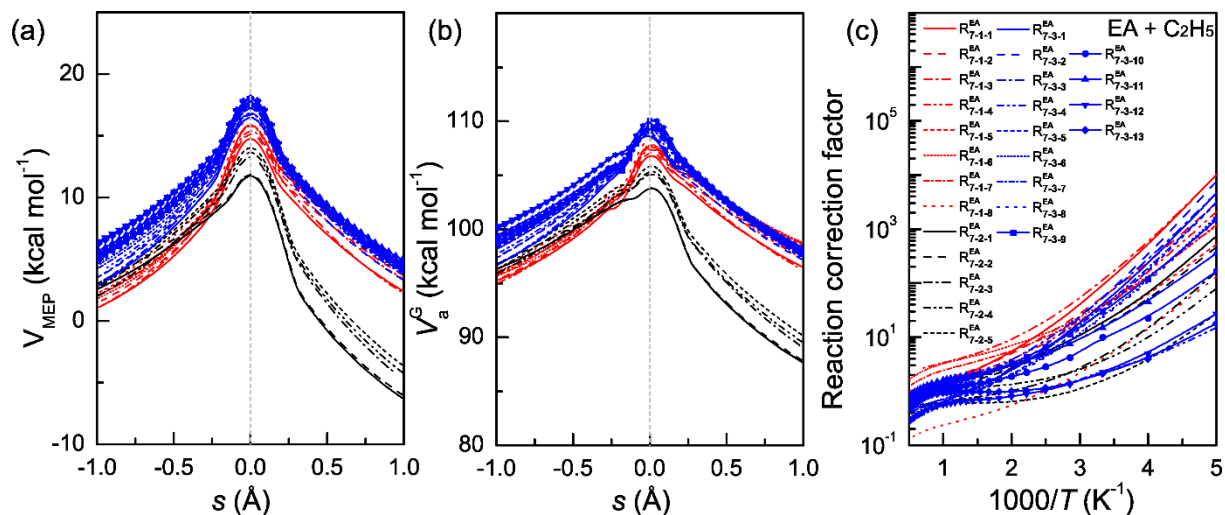

Figure S16. (a)  $V_{\text{MEP}}$ , (b)  $V_a^G$ , and reaction correction factor of each reaction path for the H-abstraction reactions from EA by C<sub>2</sub>H<sub>5</sub> radicals. R<sub>7-1</sub><sup>EA</sup>, R<sub>7-2</sub><sup>EA</sup>, and R<sub>7-3</sub><sup>EA</sup> have 8, 5, and 13 reaction paths, respectively.

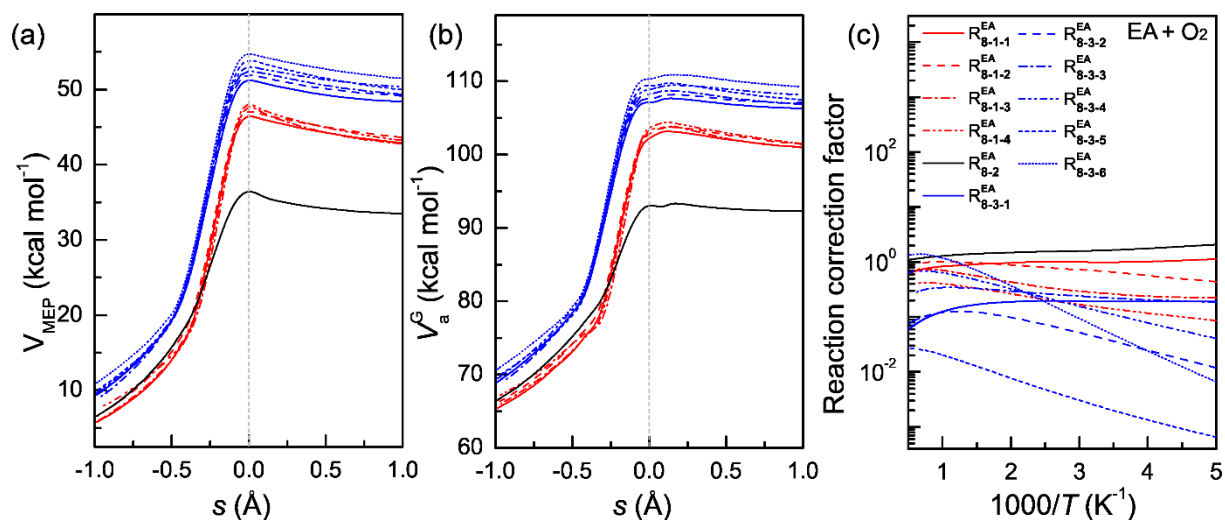

Figure S17. (a)  $V_{\text{MEP}}$ , (b)  $V_a^G$ , and reaction correction factor of each reaction path for the H-abstraction reactions from EA by C<sub>2</sub>H<sub>5</sub> radicals. R<sub>8-1</sub><sup>EA</sup>, R<sub>8-2</sub><sup>EA</sup>, and R<sub>8-3</sub><sup>EA</sup> have 4, 1, and 6 reaction paths, respectively.

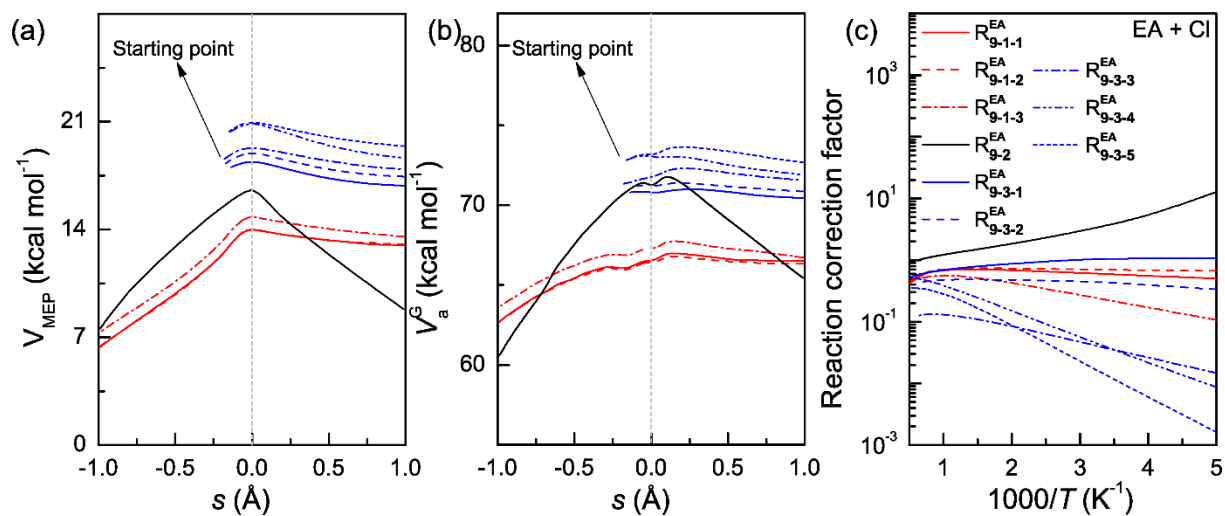

Figure S18. (a)  $V_{\text{MEP}}$ , (b)  $V_a^G$ , and reaction correction factor of each reaction path for the H-abstraction reactions from EA by Cl radicals. R<sub>9-1</sub><sup>EA</sup>, R<sub>9-2</sub><sup>EA</sup>, and R<sub>9-3</sub><sup>EA</sup> have 3, 1, and 5 reaction paths, respectively.

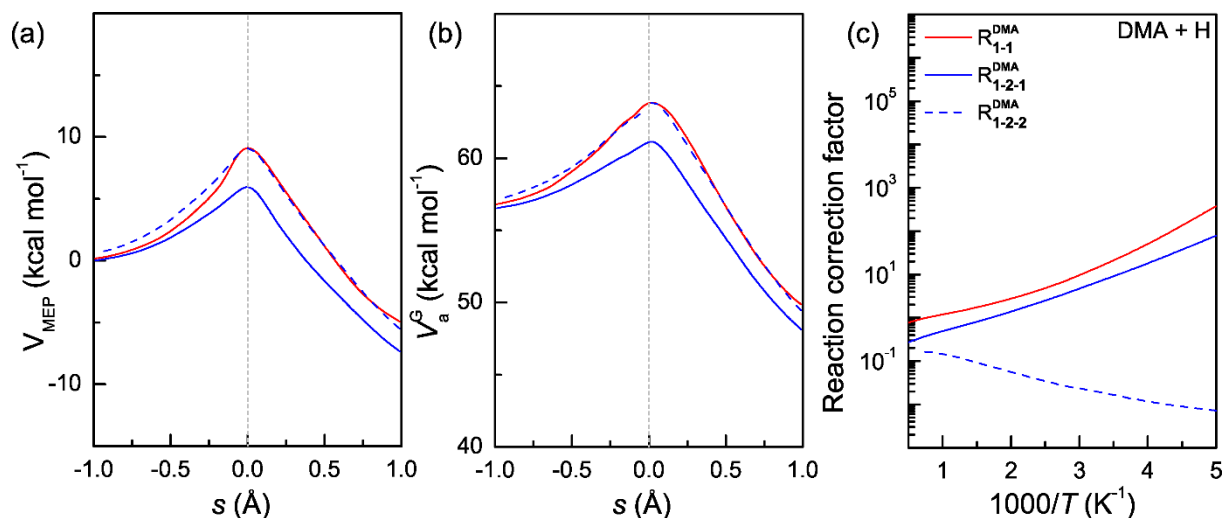

Figure S19. (a)  $V_{\text{MEP}}$ , (b)  $V_a^G$ , and reaction correction factor of each reaction path for the H-abstraction reactions from DMA by H radicals.  $R_{1-1}^{\text{DMA}}$  and  $R_{1-2}^{\text{DMA}}$  have 1 and 2 reaction paths, respectively.

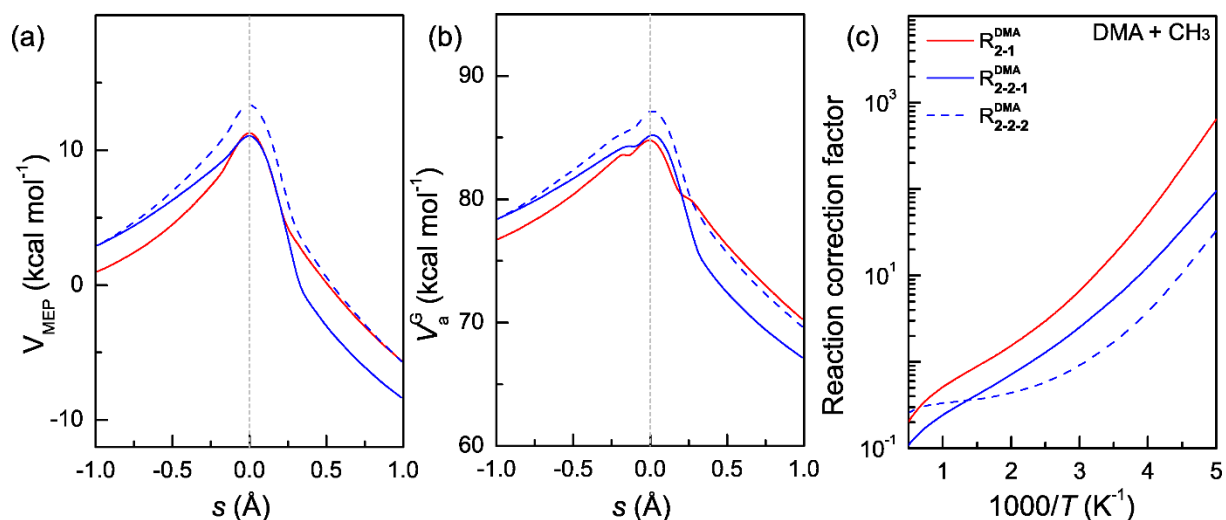

Figure S20. (a)  $V_{\text{MEP}}$ , (b)  $V_a^G$ , and reaction correction factor of each reaction path for the H-abstraction reactions from DMA by  $\text{CH}_3$  radicals.  $R_{2-1}^{\text{DMA}}$  and  $R_{2-2}^{\text{DMA}}$  have 1 and 2 reaction paths, respectively.

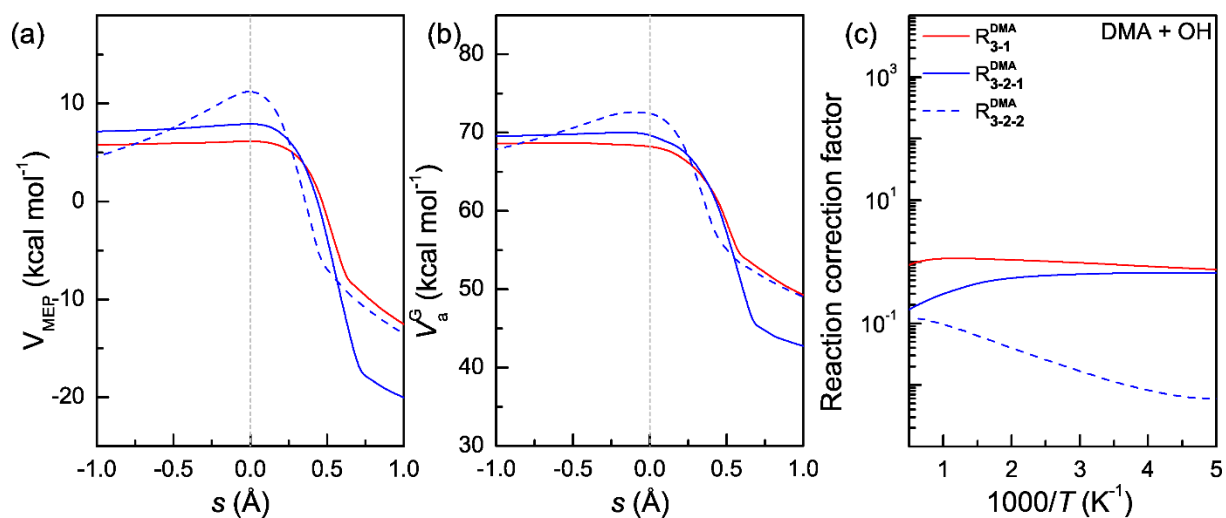

Figure S21. (a)  $V_{\text{MEP}}$ , (b)  $V_a^G$ , and reaction correction factor of each reaction path for the H-abstraction reactions from DMA by OH radicals.  $R_{3-1}^{\text{DMA}}$  and  $R_{3-2}^{\text{DMA}}$  have 1 and 2 reaction paths, respectively.



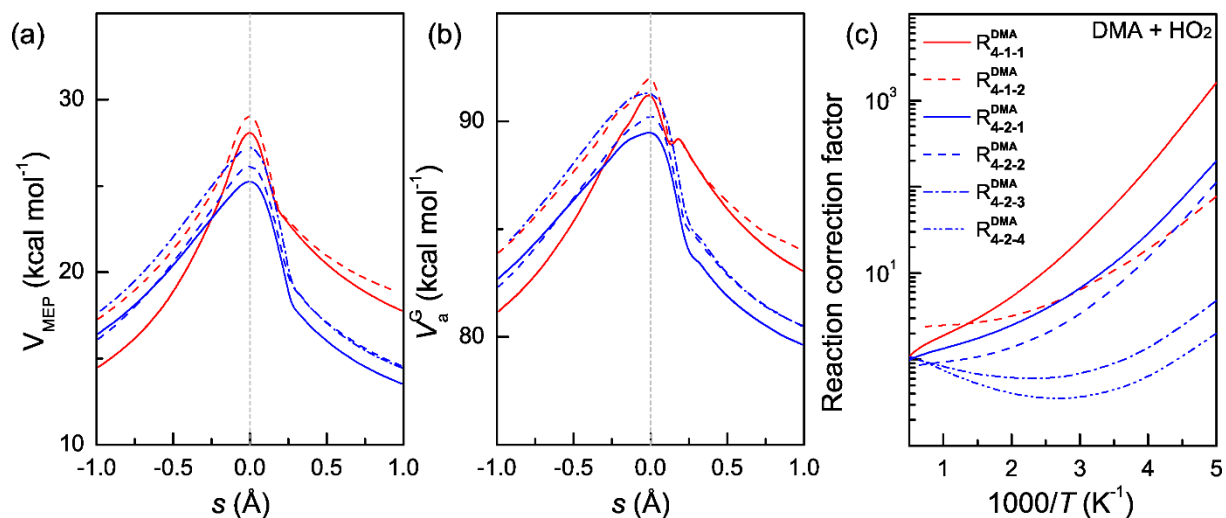

Figure S22. (a)  $V_{\text{MEP}}$ , (b)  $V_a^G$ , and reaction correction factor of each reaction path for the H-abstraction reactions from DMA by HO<sub>2</sub> radicals.  $R_{4-1}^{\text{DMA}}$  and  $R_{4-2}^{\text{DMA}}$  have 1 and 2 reaction paths, respectively.

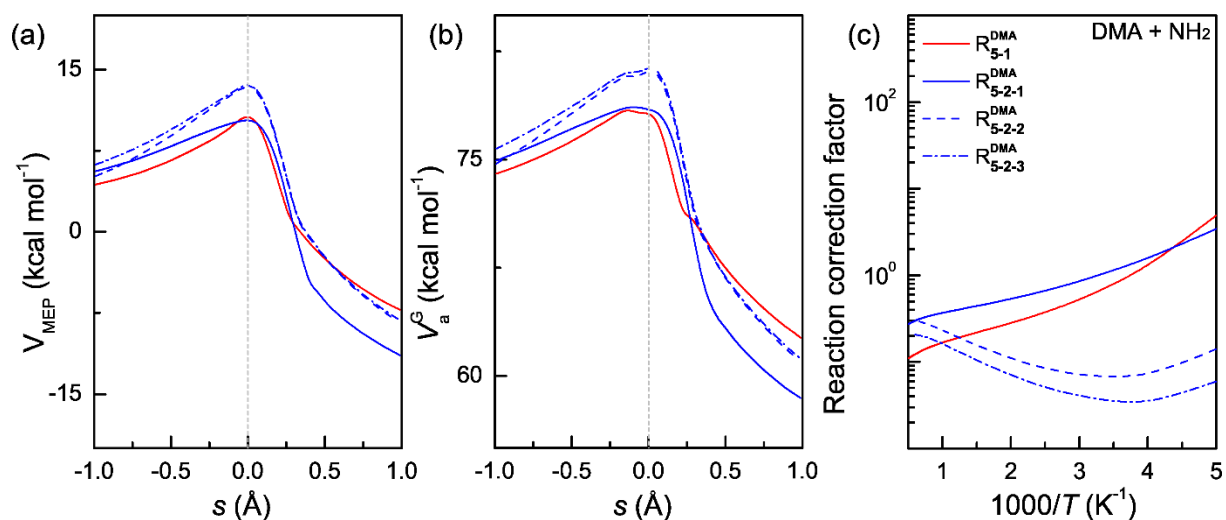

Figure S23. (a)  $V_{\text{MEP}}$ , (b)  $V_a^G$ , and reaction correction factor of each reaction path for the H-abstraction reactions from DMA by NH<sub>2</sub> radicals.  $R_{5-1}^{\text{DMA}}$  and  $R_{5-2}^{\text{DMA}}$  have 1 and 3 reaction paths, respectively.

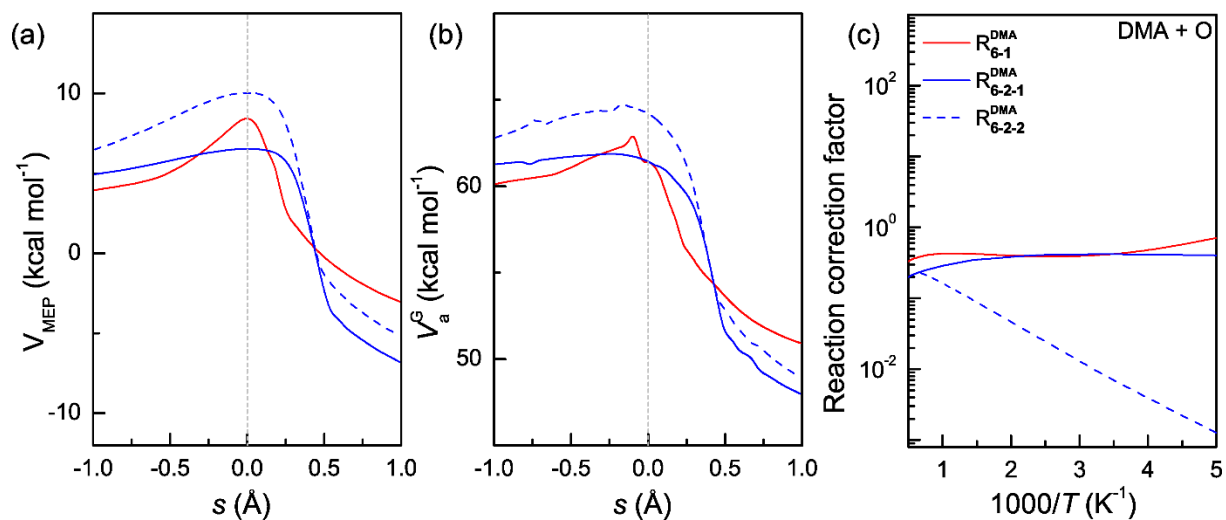

Figure S24. (a)  $V_{\text{MEP}}$ , (b)  $V_a^G$ , and reaction correction factor of each reaction path for the H-abstraction reactions from DMA by O radicals.  $R_{6-1}^{\text{DMA}}$  and  $R_{6-2}^{\text{DMA}}$  have 1 and 2 reaction paths, respectively.

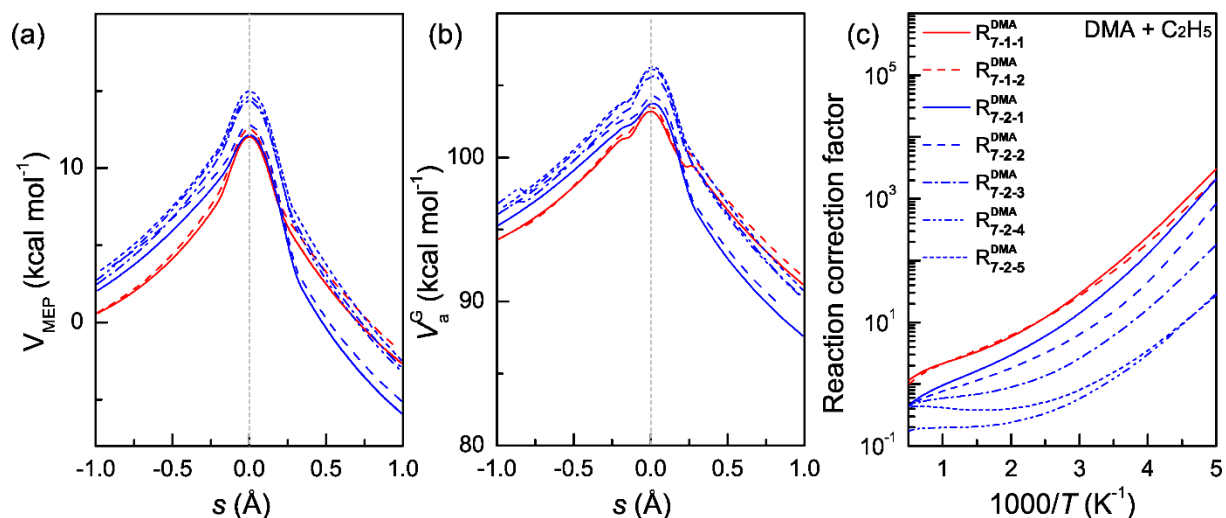

Figure S25. (a)  $V_{\text{MEP}}$ , (b)  $V_a^G$ , and reaction correction factor of each reaction path for the H-abstraction reactions from DMA by  $\text{C}_2\text{H}_5$  radicals.  $\text{R}_{7-1}^{\text{DMA}}$  and  $\text{R}_{7-2}^{\text{DMA}}$  have 2 and 5 reaction paths, respectively.

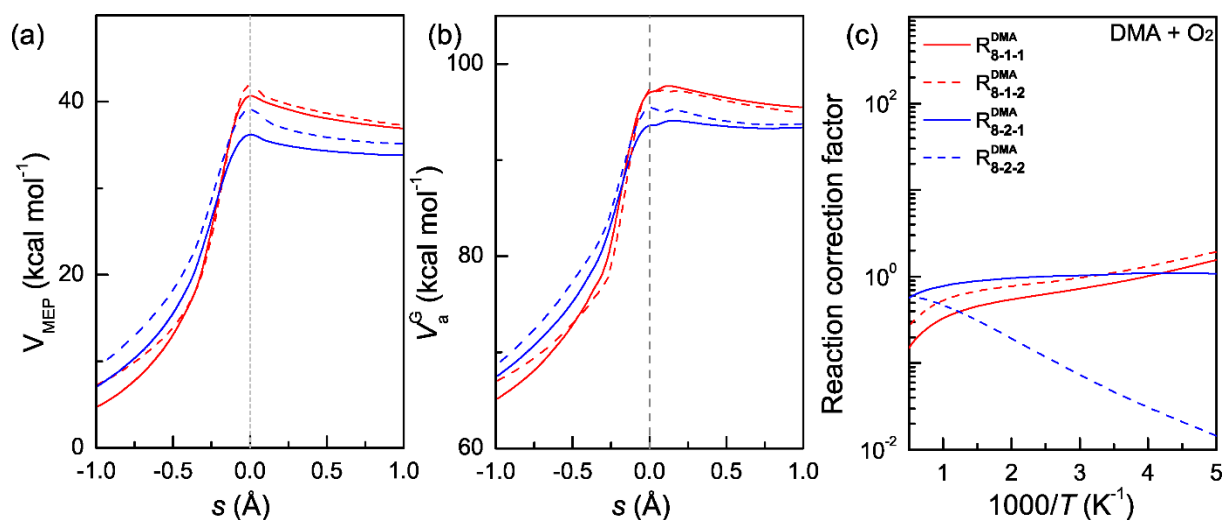

Figure S26. (a)  $V_{\text{MEP}}$ , (b)  $V_a^G$ , and reaction correction factor of each reaction path for the H-abstraction reactions from DMA by  $\text{O}_2$  radicals.  $\text{R}_{8-1}^{\text{DMA}}$  and  $\text{R}_{8-2}^{\text{DMA}}$  both have 2 reaction paths.

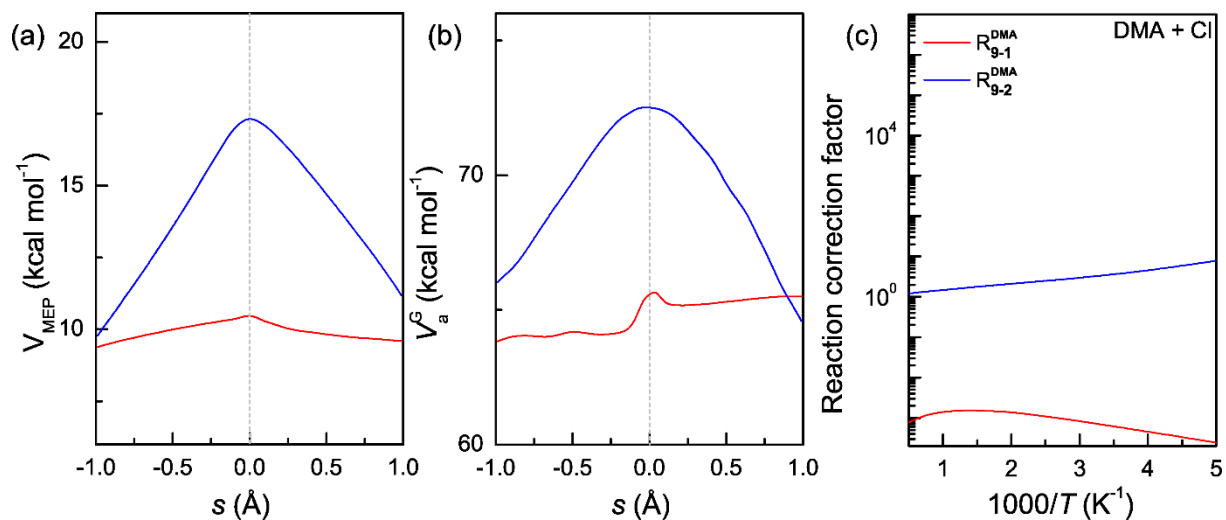

Figure S27. (a)  $V_{\text{MEP}}$ , (b)  $V_a^G$ , and reaction correction factor of each reaction path for the H-abstraction reactions from DMA by  $\text{O}_2$  radicals.  $\text{R}_{9-1}^{\text{DMA}}$  and  $\text{R}_{9-2}^{\text{DMA}}$  both have 1 reaction path.

Table S1.  
 Reaction energies ( $\Delta H$ ), and forward and reverse barrier heights ( $\Delta E^+$  and  $\Delta E^-$ ) for the H-abstraction reactions from MA by H, CH<sub>3</sub>, OH, HO<sub>2</sub>, NH<sub>2</sub>, O, C<sub>2</sub>H<sub>5</sub>, and O<sub>2</sub> at the N site, obtained with different methods on the basis of the M08-HX/ma-TZVP geometries. Units are in kcal mol<sup>-1</sup>.

| Methods     |         | R1-1 (MA+H)      |                    |                    | R2-1 (MA+CH <sub>3</sub> ) |                    |                    | R3-1 (MA+OH)     |                    |                    | R4-1 (MA+HO <sub>2</sub> ) |                    |                    | R5-1 (MA+NH <sub>2</sub> ) |                    |                    | R6-1 (MA+O)      |                    |                    | R7-1 (MA+C <sub>2</sub> H <sub>5</sub> ) |                    |                    | R8-1 (MA+O <sub>2</sub> ) |                    |                    |
|-------------|---------|------------------|--------------------|--------------------|----------------------------|--------------------|--------------------|------------------|--------------------|--------------------|----------------------------|--------------------|--------------------|----------------------------|--------------------|--------------------|------------------|--------------------|--------------------|------------------------------------------|--------------------|--------------------|---------------------------|--------------------|--------------------|
|             |         | $\Delta H_{1-1}$ | $\Delta E_{1-1}^+$ | $\Delta E_{1-1}^-$ | $\Delta H_{2-1}$           | $\Delta E_{2-1}^+$ | $\Delta E_{2-1}^-$ | $\Delta H_{3-1}$ | $\Delta E_{3-1}^+$ | $\Delta E_{3-1}^-$ | $\Delta H_{4-1}$           | $\Delta E_{4-1}^+$ | $\Delta E_{4-1}^-$ | $\Delta H_{5-1}$           | $\Delta E_{5-1}^+$ | $\Delta E_{5-1}^-$ | $\Delta H_{6-1}$ | $\Delta E_{6-1}^+$ | $\Delta E_{6-1}^-$ | $\Delta H_{7-1}$                         | $\Delta E_{7-1}^+$ | $\Delta E_{7-1}^-$ | $\Delta H_{8-1}$          | $\Delta E_{8-1}^+$ | $\Delta E_{8-1}^-$ |
| CCSD(T)/CBS |         | -1.8             | 11.6               | 13.4               | -4.7                       | 13.5               | 18.2               | -18.0            | -0.4               | 17.7               | 13.8                       | 18.7               | 5.0                | -7.6                       | 7.9                | 15.5               | 0.5              | 7.4                | 6.9                | -1.1                                     | 14.4               | 15.5               | 52.8                      | 46.4               | -6.3               |
| M08-HX      | ma-TZVP | 0.0              | 12.2               | 12.2               | -4.2                       | 14.3               | 18.6               | -16.2            | 0.2                | 16.5               | 16.3                       | 20.9               | 4.5                | -8.2                       | 8.5                | 16.7               | 1.8              | 7.9                | 6.1                | -0.3                                     | 15.6               | 15.9               | 53.7                      | 47.0               | -6.7               |
|             | MG3S    | -0.1             | 12.2               | 12.3               | -4.0                       | 14.3               | 18.2               | -16.9            | -0.5               | 16.4               | 15.7                       | 20.0               | 4.3                | -8.2                       | 8.3                | 16.5               | 1.3              | 7.3                | 6.1                | 0.0                                      | 15.4               | 15.4               | 53.1                      | 45.7               | -7.4               |
|             | jun-TZ  | -0.3             | 12.1               | 12.4               | -4.1                       | 14.5               | 18.5               | -17.3            | -0.4               | 16.9               | 15.3                       | 20.1               | 4.9                | -8.2                       | 8.7                | 16.8               | 0.9              | 7.4                | 6.5                | -0.2                                     | 15.7               | 15.9               | 52.8                      | 46.2               | -6.6               |
|             | jul-TZ  | -0.3             | 12.1               | 12.4               | -4.1                       | 14.4               | 18.5               | -17.3            | -0.4               | 16.8               | 15.2                       | 20.1               | 4.9                | -8.2                       | 8.7                | 16.9               | 0.9              | 7.4                | 6.5                | -0.2                                     | 15.7               | 15.9               | 52.7                      | 46.2               | -6.6               |
|             | maug-TZ | -0.2             | 12.2               | 12.4               | -3.9                       | 14.5               | 18.5               | -17.1            | -0.3               | 16.8               | 15.3                       | 20.1               | 4.8                | -8.2                       | 8.7                | 16.9               | 1.2              | 7.6                | 6.4                | -0.1                                     | 15.8               | 15.8               | 53.0                      | 46.4               | -6.6               |
|             | TZ      | -0.5             | 11.6               | 12.1               | -4.6                       | 13.7               | 18.2               | -16.5            | -0.9               | 15.6               | 15.6                       | 19.5               | 3.9                | -8.0                       | 7.8                | 15.8               | 1.8              | 7.3                | 5.5                | -0.7                                     | 14.9               | 15.6               | 53.1                      | 45.4               | -7.7               |
| M06-2X      | ma-TZVP | -1.4             | 12.1               | 13.4               | -5.1                       | 12.2               | 17.3               | -16.6            | -1.1               | 15.5               | 15.4                       | 17.6               | 2.3                | -8.1                       | 6.2                | 14.3               | 1.2              | 5.1                | 3.9                | -1.0                                     | 13.5               | 14.6               | 54.6                      | 45.5               | -9.1               |
|             | MG3S    | -1.4             | 11.9               | 13.3               | -5.0                       | 12.0               | 17.1               | -17.1            | -1.3               | 15.8               | 14.9                       | 17.1               | 2.2                | -7.9                       | 6.2                | 14.1               | 0.8              | 4.9                | 4.1                | -0.9                                     | 13.4               | 14.3               | 54.1                      | 44.7               | -9.4               |
|             | jun-TZ  | -1.5             | 11.9               | 13.4               | -5.1                       | 12.2               | 17.3               | -17.5            | -1.4               | 16.1               | 14.4                       | 17.0               | 2.6                | -8.0                       | 6.5                | 14.4               | 0.3              | 4.7                | 4.4                | -1.0                                     | 13.6               | 14.6               | 53.5                      | 44.6               | -8.9               |
|             | jul-TZ  | -1.5             | 11.9               | 13.4               | -5.1                       | 12.2               | 17.3               | -17.5            | -1.4               | 16.1               | 14.3                       | 17.0               | 2.6                | -8.0                       | 6.5                | 14.4               | 0.3              | 4.7                | 4.3                | -1.0                                     | 13.6               | 14.5               | 53.4                      | 44.5               | -8.9               |
|             | maug-TZ | -1.4             | 12.0               | 13.4               | -5.0                       | 12.3               | 17.2               | -17.4            | -1.3               | 16.0               | 14.4                       | 17.0               | 2.6                | -8.0                       | 6.4                | 14.4               | 0.5              | 4.8                | 4.3                | -0.9                                     | 13.6               | 14.5               | 53.6                      | 44.7               | -8.9               |
|             | TZ      | -1.6             | 11.4               | 13.1               | -5.4                       | 11.5               | 16.9               | -16.7            | -1.9               | 14.8               | 14.7                       | 16.4               | 1.7                | -7.8                       | 5.6                | 13.4               | 1.2              | 4.6                | 3.4                | -1.3                                     | 12.9               | 14.2               | 53.8                      | 43.7               | -10.0              |
| M05-2X      | ma-TZVP | -1.0             | 12.9               | 13.9               | -5.5                       | 12.5               | 18.0               | -17.1            | -0.9               | 16.2               | 15.9                       | 18.3               | 2.4                | -8.6                       | 6.9                | 15.6               | 1.2              | 5.3                | 4.1                | -1.3                                     | 14.1               | 15.4               | 54.7                      | 46.4               | -8.3               |
|             | MG3S    | -0.9             | 13.0               | 14.0               | -5.4                       | 12.6               | 18.0               | -17.7            | -1.0               | 16.7               | 15.3                       | 18.0               | 2.7                | -8.5                       | 7.1                | 15.7               | 0.5              | 5.0                | 4.5                | -1.1                                     | 14.2               | 15.3               | 53.9                      | 45.6               | -8.3               |
|             | jun-TZ  | -1.1             | 13.0               | 14.0               | -5.4                       | 12.7               | 18.1               | -18.1            | -1.2               | 16.9               | 14.8                       | 17.7               | 2.9                | -8.5                       | 7.4                | 15.8               | 0.1              | 4.8                | 4.7                | -1.2                                     | 14.3               | 15.5               | 53.2                      | 45.3               | -7.9               |
|             | jul-TZ  | -1.0             | 13.0               | 14.0               | -5.4                       | 12.7               | 18.0               | -18.1            | -1.3               | 16.8               | 14.7                       | 17.7               | 3.0                | -8.5                       | 7.3                | 15.8               | 0.1              | 4.8                | 4.7                | -1.1                                     | 14.3               | 15.4               | 53.1                      | 45.2               | -7.8               |
|             | maug-TZ | -1.0             | 13.0               | 14.0               | -5.3                       | 12.7               | 18.0               | -17.9            | -1.2               | 16.8               | 14.8                       | 17.7               | 2.9                | -8.5                       | 7.3                | 15.8               | 0.2              | 4.9                | 4.6                | -1.1                                     | 14.3               | 15.4               | 53.3                      | 45.4               | -7.9               |
|             | TZ      | -1.2             | 12.4               | 13.6               | -5.7                       | 12.0               | 17.7               | -17.3            | -1.7               | 15.7               | 15.0                       | 17.2               | 2.1                | -8.3                       | 6.5                | 14.8               | 0.8              | 4.6                | 3.8                | -1.5                                     | 13.7               | 15.2               | 53.3                      | 44.4               | -8.9               |
| B3LYP       | ma-TZVP | -6.3             | 4.9                | 11.2               | -7.0                       | 10.6               | 17.6               | -17.6            | -7.0               | 10.6               | 15.6                       | 14.2               | -1.3               | -9.0                       | 3.4                | 12.5               | -3.1             | -2.0               | 1.2                | -2.4                                     | 13.4               | 15.8               | 50.7                      | 38.7               | -12.0              |
|             | MG3S    | -6.0             | 5.2                | 11.1               | -6.8                       | 10.8               | 17.6               | -18.3            | -7.1               | 11.2               | 15.1                       | 14.1               | -1.0               | -8.9                       | 3.7                | 12.6               | -3.7             | -2.0               | 1.6                | -2.1                                     | 13.7               | 15.8               | 50.1                      | 38.3               | -11.8              |
|             | jun-TZ  | -6.1             | 5.0                | 11.2               | -6.9                       | 10.7               | 17.6               | -18.4            | -7.1               | 11.4               | 14.8                       | 14.1               | -0.7               | -8.9                       | 3.9                | 12.8               | -3.9             | -2.0               | 1.9                | -2.2                                     | 13.7               | 15.9               | 49.9                      | 38.4               | -11.4              |
|             | jul-TZ  | -6.1             | 5.0                | 11.1               | -6.9                       | 10.7               | 17.6               | -18.4            | -7.1               | 11.3               | 14.8                       | 14.1               | -0.7               | -8.9                       | 3.9                | 12.8               | -3.9             | -2.1               | 1.8                | -2.2                                     | 13.7               | 15.8               | 49.8                      | 38.4               | -11.4              |

| Methods | R1-1 (MA+H)      |                    |                    | R2-1 (MA+CH <sub>3</sub> ) |                    |                    | R3-1 (MA+OH)     |                    |                    | R4-1 (MA+HO <sub>2</sub> ) |                    |                    | R5-1 (MA+NH <sub>2</sub> ) |                    |                    | R6-1 (MA+O)      |                    |                    | R7-1 (MA+C <sub>2</sub> H <sub>5</sub> ) |                    |                    | R8-1 (MA+O <sub>2</sub> ) |                    |                    |       |
|---------|------------------|--------------------|--------------------|----------------------------|--------------------|--------------------|------------------|--------------------|--------------------|----------------------------|--------------------|--------------------|----------------------------|--------------------|--------------------|------------------|--------------------|--------------------|------------------------------------------|--------------------|--------------------|---------------------------|--------------------|--------------------|-------|
|         | $\Delta H_{1-1}$ | $\Delta E_{1-1}^+$ | $\Delta E_{1-1}^-$ | $\Delta H_{2-1}$           | $\Delta E_{2-1}^+$ | $\Delta E_{2-1}^-$ | $\Delta H_{3-1}$ | $\Delta E_{3-1}^+$ | $\Delta E_{3-1}^-$ | $\Delta H_{4-1}$           | $\Delta E_{4-1}^+$ | $\Delta E_{4-1}^-$ | $\Delta H_{5-1}$           | $\Delta E_{5-1}^+$ | $\Delta E_{5-1}^-$ | $\Delta H_{6-1}$ | $\Delta E_{6-1}^+$ | $\Delta E_{6-1}^-$ | $\Delta H_{7-1}$                         | $\Delta E_{7-1}^+$ | $\Delta E_{7-1}^-$ | $\Delta H_{8-1}$          | $\Delta E_{8-1}^+$ | $\Delta E_{8-1}^-$ |       |
| maug-TZ | -6.1             | 5.0                | 11.1               | -6.8                       | 10.7               | 17.6               | -18.3            | -7.1               | 11.2               | 14.9                       | 14.1               | -0.8               | -8.9                       | 3.8                | 12.7               | -3.7             | -2.0               | 1.7                | -2.2                                     | 13.6               | 15.8               | 50.0                      | 38.5               | -11.5              |       |
|         | TZ               | -6.3               | 4.3                | 10.6                       | -7.4               | 9.7                | 17.1             | -17.5              | -7.9               | 9.6                        | 15.4               | 13.2               | -2.2                       | -8.7               | 2.6                | 11.3             | -2.8               | -2.3               | 0.5                                      | -2.7               | 12.7               | 15.4                      | 50.3               | 37.1               | -13.1 |
| ωB97X-D | ma-TZVP          | -2.1               | 9.9                | 12.0                       | -6.5               | 10.5               | 17.0             | -16.9              | -3.9               | 13.1                       | 17.0               | 17.8               | 0.8                        | -8.7               | 4.9                | 13.7             | -0.3               | 2.8                | 3.0                                      | -2.2               | 12.0               | 14.2                      | 53.6               | 43.5               | -10.1 |
|         | MG3S             | -1.8               | 10.1               | 11.9                       | -6.2               | 10.6               | 16.8             | -17.9              | -4.4               | 13.5                       | 16.3               | 17.1               | 0.8                        | -8.6               | 5.0                | 13.6             | -1.0               | 2.2                | 3.2                                      | -1.8               | 12.1               | 13.9                      | 52.8               | 42.4               | -10.4 |
|         | jun-TZ           | -2.1               | 9.9                | 11.9                       | -6.4               | 10.5               | 16.9             | -17.9              | -4.1               | 13.7                       | 16.3               | 17.4               | 1.2                        | -8.6               | 5.2                | 13.8             | -1.1               | 2.4                | 3.5                                      | -2.0               | 12.1               | 14.2                      | 52.7               | 42.9               | -9.8  |
|         | jul-TZ           | -2.1               | 9.9                | 11.9                       | -6.4               | 10.5               | 16.9             | -17.8              | -4.2               | 13.7                       | 16.2               | 17.4               | 1.2                        | -8.6               | 5.2                | 13.8             | -1.1               | 2.4                | 3.5                                      | -2.0               | 12.1               | 14.1                      | 52.7               | 42.8               | -9.8  |
|         | maug-TZ          | -2.0               | 9.9                | 11.9                       | -6.4               | 10.5               | 16.9             | -17.7              | -4.1               | 13.6                       | 16.3               | 17.4               | 1.1                        | -8.6               | 5.1                | 13.8             | -0.9               | 2.5                | 3.4                                      | -2.0               | 12.1               | 14.1                      | 52.9               | 42.9               | -9.9  |
|         | TZ               | -2.2               | 9.3                | 11.5                       | -6.9               | 9.7                | 16.6             | -17.0              | -4.7               | 12.3                       | 16.7               | 16.8               | 0.1                        | -8.4               | 4.3                | 12.7             | -0.2               | 2.3                | 2.5                                      | -2.5               | 11.4               | 13.8                      | 53.0               | 41.9               | -11.1 |
| MN15-L  | ma-TZVP          | -6.7               | 7.5                | 14.2                       | -6.9               | 13.0               | 19.9             | -17.6              | -2.9               | 14.7                       | 13.0               | 14.4               | 1.4                        | -8.4               | 6.1                | 14.5             | -1.0               | 3.4                | 4.4                                      | -2.5               | 13.6               | 16.1                      | 51.0               | 39.8               | -11.2 |
|         | MG3S             | -6.1               | 8.1                | 14.2                       | -6.3               | 13.5               | 19.8             | -18.6              | -3.1               | 15.5                       | 12.7               | 14.5               | 1.7                        | -8.6               | 6.5                | 15.1             | -1.7               | 3.3                | 5.0                                      | -1.9               | 14.0               | 15.9                      | 50.7               | 39.6               | -11.1 |
|         | jun-TZ           | -6.0               | 7.9                | 13.9                       | -6.1               | 13.4               | 19.5             | -18.5              | -3.2               | 15.3                       | 12.5               | 14.3               | 1.8                        | -8.3               | 6.4                | 14.8             | -1.5               | 3.3                | 4.9                                      | -1.9               | 13.9               | 15.8                      | 50.7               | 39.7               | -11.0 |
|         | jul-TZ           | -6.0               | 7.9                | 13.9                       | -6.2               | 13.3               | 19.5             | -18.6              | -3.3               | 15.2                       | 12.6               | 14.2               | 1.7                        | -8.4               | 6.3                | 14.7             | -1.7               | 3.1                | 4.7                                      | -1.9               | 13.7               | 15.6                      | 50.6               | 39.5               | -11.1 |
|         | maug-TZ          | -5.9               | 8.0                | 13.9                       | -6.4               | 13.4               | 19.5             | -18.4              | -3.2               | 15.2                       | 12.6               | 14.3               | 1.7                        | -8.4               | 6.3                | 14.7             | -1.3               | 3.4                | 4.8                                      | -1.8               | 13.9               | 15.7                      | 50.8               | 39.8               | -11.1 |
|         | TZ               | -6.1               | 7.3                | 13.4                       | -6.7               | 12.4               | 19.1             | -17.6              | -3.8               | 13.8                       | 13.1               | 13.6               | 0.5                        | -8.2               | 5.2                | 13.4             | -0.5               | 3.2                | 3.7                                      | -2.4               | 12.9               | 15.4                      | 51.2               | 38.7               | -12.5 |
| BH&HLYP | ma-TZVP          | -6.5               | 9.1                | 15.6                       | -7.1               | 15.7               | 22.8             | -14.6              | 3.4                | 18.0                       | 15.1               | 22.1               | 7.0                        | -7.9               | 11.6               | 19.5             | 1.0                | 9.3                | 8.3                                      | -3.2               | 17.9               | 21.1                      | 49.1               | 45.8               | -3.3  |
|         | MG3S             | -6.2               | 9.3                | 15.5                       | -6.8               | 15.9               | 22.7             | -15.3              | 3.2                | 18.5                       | 14.6               | 21.8               | 7.2                        | -7.8               | 11.8               | 19.6             | 0.4                | 9.2                | 8.7                                      | -2.9               | 18.1               | 21.0                      | 48.6               | 45.3               | -3.3  |
|         | jun-TZ           | -6.3               | 9.2                | 15.5                       | -6.9               | 15.8               | 22.7             | -15.4              | 3.3                | 18.7                       | 14.4               | 21.9               | 7.5                        | -7.8               | 12.0               | 19.8             | 0.2                | 9.1                | 8.9                                      | -3.0               | 18.1               | 21.0                      | 48.4               | 45.5               | -2.9  |
|         | jul-TZ           | -6.3               | 9.2                | 15.5                       | -6.9               | 15.8               | 22.7             | -15.4              | 3.3                | 18.7                       | 14.4               | 21.9               | 7.5                        | -7.8               | 11.9               | 19.7             | 0.2                | 9.1                | 8.9                                      | -2.9               | 18.1               | 21.0                      | 48.6               | 45.4               | -2.9  |
|         | maug-TZ          | -6.2               | 9.2                | 15.4                       | -6.9               | 15.8               | 22.7             | -15.3              | 3.3                | 18.6                       | 14.5               | 21.9               | 7.4                        | -7.8               | 11.9               | 19.7             | 0.4                | 9.2                | 8.8                                      | -2.9               | 18.0               | 21.0                      | 48.5               | 45.5               | -3.0  |
|         | TZ               | -6.5               | 8.6                | 15.1                       | -7.4               | 15.0               | 22.4             | -14.6              | 2.6                | 17.2                       | 14.7               | 21.4               | 6.6                        | -7.6               | 11.0               | 18.7             | 1.1                | 9.0                | 8.0                                      | -3.4               | 17.3               | 20.7                      | 48.5               | 44.5               | -4.0  |
| PW6B95  | ma-TZVP          | -3.3               | 8.3                | 11.6                       | -7.4               | 10.2               | 17.6             | -17.3              | -5.4               | 11.9                       | 16.7               | 16.7               | 0.0                        | -9.1               | 4.1                | 13.3             | -0.4               | 1.6                | 2.0                                      | -2.7               | 12.6               | 15.2                      | 52.9               | 42.0               | -11.0 |
|         | MG3S             | -3.0               | 8.5                | 11.5                       | -7.1               | 10.4               | 17.5             | -18.0              | -5.6               | 12.4                       | 16.2               | 16.4               | 0.2                        | -9.0               | 4.4                | 13.4             | -1.0               | 1.4                | 2.4                                      | -2.3               | 12.7               | 15.1                      | 52.4               | 41.3               | -11.1 |
|         | jun-TZ           | -3.1               | 8.4                | 11.5                       | -7.3               | 10.4               | 17.6             | -18.1              | -5.5               | 12.6                       | 16.0               | 16.5               | 0.5                        | -9.0               | 4.6                | 13.5             | -1.2               | 1.5                | 2.7                                      | -2.5               | 12.8               | 15.3                      | 42.1               | 41.6               | -10.5 |
|         | jul-TZ           | -3.1               | 8.4                | 11.5                       | -7.2               | 10.3               | 17.6             | -18.1              | -5.5               | 12.5                       | 16.0               | 16.5               | 0.5                        | -9.0               | 4.6                | 13.5             | -1.2               | 1.5                | 2.6                                      | -2.5               | 12.8               | 15.2                      | 52.0               | 41.5               | -10.5 |
|         | maug-TZ          | -3.1               | 8.4                | 11.5                       | -7.2               | 10.4               | 17.6             | -18.0              | -5.5               | 12.5                       | 16.1               | 16.5               | 0.4                        | -9.0               | 4.5                | 13.5             | -1.0               | 1.5                | 2.5                                      | -2.5               | 12.8               | 15.2                      | 52.2               | 41.6               | -10.6 |
|         | TZ               | -3.3               | 7.7                | 11.0                       | -7.8               | 9.4                | 17.2             | -17.2              | -6.3               | 10.9                       | 16.5               | 15.7               | -0.8                       | -8.8               | 3.3                | 12.1             | -0.1               | 1.2                | 1.4                                      | -3.0               | 1.8                | 14.8                      | 52.5               | 40.4               | -12.1 |
| MP      | ma-TZVP          | -2.6               | 10.3               | 13.0                       | -6.2               | 13.6               | 19.9             | -15.5              | 1.2                | 16.7                       | 16.1               | 20.4               | 4.3                        | -8.2               | 8.7                | 16.8             | 0.9                | 7.0                | 6.2                                      | -2.1               | 15.9               | 18.0                      | 51.0               | 45.1               | -5.9  |
|         | MG3S             | -2.3               | 10.5               | 12.8                       | -6.0               | 13.7               | 19.7             | -16.2              | 0.9                | 17.1                       | 15.6               | 19.9               | 4.3                        | -8.1               | 8.8                | 16.8             | 0.4                | 6.7                | 6.4                                      | -1.8               | 16.0               | 17.8                      | 50.5               | 44.3               | -6.2  |

| Methods   | R1-1 (MA+H)      |                    |                    | R2-1 (MA+CH <sub>3</sub> ) |                    |                    | R3-1 (MA+OH)     |                    |                    | R4-1 (MA+HO <sub>2</sub> ) |                    |                    | R5-1 (MA+NH <sub>2</sub> ) |                    |                    | R6-1 (MA+O)      |                    |                    | R7-1 (MA+C <sub>2</sub> H <sub>5</sub> ) |                    |                    | R8-1 (MA+O <sub>2</sub> ) |                    |                    |      |
|-----------|------------------|--------------------|--------------------|----------------------------|--------------------|--------------------|------------------|--------------------|--------------------|----------------------------|--------------------|--------------------|----------------------------|--------------------|--------------------|------------------|--------------------|--------------------|------------------------------------------|--------------------|--------------------|---------------------------|--------------------|--------------------|------|
|           | $\Delta H_{1-1}$ | $\Delta E_{1-1}^+$ | $\Delta E_{1-1}^-$ | $\Delta H_{2-1}$           | $\Delta E_{2-1}^+$ | $\Delta E_{2-1}^-$ | $\Delta H_{3-1}$ | $\Delta E_{3-1}^+$ | $\Delta E_{3-1}^-$ | $\Delta H_{4-1}$           | $\Delta E_{4-1}^+$ | $\Delta E_{4-1}^-$ | $\Delta H_{5-1}$           | $\Delta E_{5-1}^+$ | $\Delta E_{5-1}^-$ | $\Delta H_{6-1}$ | $\Delta E_{6-1}^+$ | $\Delta E_{6-1}^-$ | $\Delta H_{7-1}$                         | $\Delta E_{7-1}^+$ | $\Delta E_{7-1}^-$ | $\Delta H_{8-1}$          | $\Delta E_{8-1}^+$ | $\Delta E_{8-1}^-$ |      |
| jun-TZ    | -2.5             | 10.4               | 12.8               | -6.1                       | 13.7               | 19.8               | -16.4            | 1.0                | 17.4               | 15.4                       | 20.1               | 4.7                | -8.0                       | 8.9                | 17.0               | 0.1              | 6.8                | 6.7                | -1.9                                     | 46.0               | 17.9               | 50.2                      | 44.6               | -5.6               |      |
| jul-TZ    | -2.5             | 10.3               | 12.8               | -6.1                       | 13.7               | 19.8               | 16.3             | 1.0                | 17.4               | 15.4                       | 20.1               | 4.7                | -8.0                       | 8.9                | 17.0               | 0.1              | 6.7                | 6.6                | -1.9                                     | 16.0               | 17.9               | 50.1                      | 44.5               | -5.6               |      |
| maug-TZ   | -2.4             | 10.4               | 12.8               | -6.1                       | 13.7               | 19.7               | -16.2            | 1.1                | 17.3               | 15.4                       | 20.0               | 4.6                | -8.3                       | 8.9                | 17.1               | 0.3              | 6.9                | 6.6                | -1.9                                     | 16.0               | 17.9               | 50.3                      | 44.6               | -5.7               |      |
| TZ        | -2.6             | 9.8                | 12.5               | -6.5                       | 13.0               | 19.5               | -15.6            | 0.5                | 16.1               | 15.7                       | 19.5               | 3.9                | -7.9                       | 8.1                | 16.0               | 0.9              | 6.7                | 5.8                | -2.3                                     | 15.3               | 17.7               | 50.4                      | 43.7               | -6.7               |      |
| SOGGA11-X | ma-TZVP          | -2.0               | 10.5               | 12.5                       | -8.2               | 11.4               | 19.6             | -16.1              | -1.1               | 15.0                       | 16.7               | 19.9               | 3.2                        | -8.6               | 7.0                | 15.7             | -0.4               | 4.6                | 5.0                                      | -3.8               | 13.7               | 17.6                      | 52.6               | 45.1               | -7.4 |
|           | MG3S             | -1.4               | 10.8               | 12.3                       | -7.6               | 11.5               | 19.1             | -17.1              | -1.8               | 15.3                       | 16.1               | 19.1               | 3.1                        | -8.7               | 6.9                | 15.6             | -0.9               | 4.2                | 5.1                                      | -3.2               | 13.7               | 16.9                      | 51.8               | 44.0               | -7.8 |
|           | jun-TZ           | -1.8               | 10.5               | 12.4                       | -7.8               | 11.6               | 19.4             | -16.9              | -1.3               | 15.5                       | 16.0               | 19.5               | 3.5                        | -8.4               | 7.3                | 15.8             | -0.8               | 4.6                | 5.4                                      | -3.4               | 13.9               | 17.3                      | 51.9               | 44.6               | -7.3 |
|           | jul-TZ           | -1.8               | 10.5               | 12.3                       | -7.8               | 11.6               | 19.4             | -16.9              | -1.4               | 15.5                       | 16.0               | 19.4               | 3.4                        | -8.5               | 7.3                | 15.7             | -0.8               | 4.6                | 5.4                                      | -3.4               | 13.9               | 17.3                      | 51.8               | 44.5               | -7.3 |
|           | maug-TZ          | -1.8               | 10.6               | 12.3                       | -7.7               | 11.7               | 19.4             | -16.7              | -1.3               | 15.4                       | 16.1               | 19.5               | 3.4                        | -8.7               | 7.3                | 15.9             | -0.6               | 4.7                | 5.3                                      | -3.4               | 13.9               | 17.3                      | 52.0               | 44.7               | -7.4 |
|           | TZ               | -2.0               | 10.0               | 12.0                       | -8.3               | 10.8               | 19.1             | -16.1              | -1.9               | 14.2                       | 16.4               | 18.9               | 2.5                        | -8.3               | 6.4                | 14.7             | 0.0                | 4.5                | 4.5                                      | -3.9               | 13.1               | 17.0                      | 52.1               | 43.7               | -8.4 |

Table S2.

Reaction energies ( $\Delta H$ ), and forward and reverse barrier heights ( $\Delta E^+$  and  $\Delta E^-$ ) for the H-abstraction reactions from MA by H, CH<sub>3</sub>, OH, HO<sub>2</sub>, NH<sub>2</sub>, O, C<sub>2</sub>H<sub>5</sub>, and O<sub>2</sub> at the C site, obtained with different methods on the basis of the M08-HX/ma-TZVP geometries. Units are in kcal mol<sup>-1</sup>.

| Methods     |         | R1-2 (MA+H)      |                    |                    | R2-2 (MA+CH <sub>3</sub> ) |                    |                    | R3-2 (MA+OH)     |                    |                    | R4-2 (MA+HO <sub>2</sub> ) |                    |                    | R5-2 (MA+NH <sub>2</sub> ) |                    |                    | R6-2 (MA+O)      |                    |                    | R7-2 (MA+C <sub>2</sub> H <sub>5</sub> ) |                    |                    | R8-2 (MA+O <sub>2</sub> ) |                    |                    |
|-------------|---------|------------------|--------------------|--------------------|----------------------------|--------------------|--------------------|------------------|--------------------|--------------------|----------------------------|--------------------|--------------------|----------------------------|--------------------|--------------------|------------------|--------------------|--------------------|------------------------------------------|--------------------|--------------------|---------------------------|--------------------|--------------------|
|             |         | $\Delta H_{1-2}$ | $\Delta E_{1-2}^+$ | $\Delta E_{1-2}^-$ | $\Delta H_{2-2}$           | $\Delta E_{2-2}^+$ | $\Delta E_{2-2}^-$ | $\Delta H_{3-2}$ | $\Delta E_{3-2}^+$ | $\Delta E_{3-2}^-$ | $\Delta H_{4-2}$           | $\Delta E_{4-2}^+$ | $\Delta E_{4-2}^-$ | $\Delta H_{5-2}$           | $\Delta E_{5-2}^+$ | $\Delta E_{5-2}^-$ | $\Delta H_{6-2}$ | $\Delta E_{6-2}^+$ | $\Delta E_{6-2}^-$ | $\Delta H_{7-2}$                         | $\Delta E_{7-2}^+$ | $\Delta E_{7-2}^-$ | $\Delta H_{8-2}$          | $\Delta E_{8-2}^+$ | $\Delta E_{8-2}^-$ |
| CCSD(T)/CBS |         | -9.2             | 6.8                | 16.1               | -12.1                      | 12.0               | 24.1               | -25.5            | 1.2                | 26.7               | 6.3                        | 14.1               | 7.7                | -15.1                      | 6.6                | 21.6               | -6.9             | 4.6                | 11.5               | -8.6                                     | 13.3               | 21.8               | 45.3                      | 39.4               | -5.9               |
| M08-HX      | ma-TZVP | -9.1             | 6.4                | 15.5               | -13.3                      | 11.4               | 24.7               | -25.3            | 1.5                | 26.7               | 7.3                        | 13.3               | 6.0                | -17.3                      | 5.7                | 23.0               | -7.2             | 2.2                | 9.4                | -9.4                                     | 13.0               | 22.4               | 44.6                      | 38.0               | -6.7               |
|             | MG3S    | -9.4             | 6.6                | 16.0               | -13.2                      | 11.3               | 24.5               | -26.2            | 0.9                | 27.1               | 6.4                        | 12.2               | 5.8                | -17.5                      | 5.5                | 22.9               | -8.0             | 1.6                | 9.6                | -9.3                                     | 12.8               | 22.1               | 43.8                      | 36.6               | -7.2               |
|             | jun-TZ  | -9.3             | 6.6                | 15.8               | -13.0                      | 11.6               | 24.6               | -26.2            | 1.2                | 27.4               | 6.3                        | 12.6               | 6.3                | -17.2                      | 5.8                | 23.0               | -8.1             | 1.8                | 9.8                | -9.1                                     | 13.2               | 22.3               | 43.9                      | 37.3               | -6.6               |
|             | jul-TZ  | -9.2             | 6.6                | 15.8               | -13.1                      | 11.6               | 24.6               | -26.2            | 1.1                | 27.3               | 6.3                        | 12.6               | 6.3                | -17.2                      | 5.8                | 22.9               | -8.0             | 1.7                | 9.8                | -9.1                                     | 13.2               | 22.3               | 43.8                      | 37.3               | -6.5               |
|             | maug-TZ | -9.3             | 6.6                | 15.9               | -13.0                      | 11.6               | 24.7               | -26.2            | 1.1                | 27.3               | 6.3                        | 12.6               | 6.3                | -17.3                      | 5.7                | 23.0               | -7.9             | 1.8                | 9.7                | -9.1                                     | 13.3               | 22.4               | 43.9                      | 37.4               | -6.5               |
|             | TZ      | -9.0             | 6.6                | 15.6               | -13.0                      | 11.4               | 24.5               | -25.0            | 0.6                | 25.6               | 7.1                        | 12.3               | 5.1                | -16.5                      | 5.6                | 22.1               | -6.7             | 2.1                | 8.8                | -9.1                                     | 12.7               | 21.8               | 44.6                      | 36.9               | -7.7               |
| M06-2X      | ma-TZVP | -9.2             | 7.1                | 16.2               | -12.8                      | 10.7               | 23.6               | -24.3            | 0.5                | 24.9               | 7.6                        | 11.8               | 4.3                | -15.9                      | 5.0                | 20.9               | -6.6             | 1.3                | 7.9                | -8.8                                     | 12.3               | 21.1               | 46.8                      | 37.5               | -9.4               |
|             | MG3S    | -9.2             | 7.2                | 16.5               | -12.9                      | 10.6               | 23.5               | -24.9            | 0.5                | 25.4               | 7.0                        | 11.4               | 4.3                | -15.8                      | 5.0                | 20.8               | -7.1             | 1.1                | 8.1                | -8.8                                     | 12.1               | 20.9               | 46.3                      | 36.7               | -9.6               |
|             | jun-TZ  | -9.1             | 7.2                | 16.3               | -12.7                      | 10.8               | 23.5               | -25.1            | 0.4                | 25.5               | 6.8                        | 11.3               | 4.6                | -15.5                      | 5.2                | 20.7               | -7.3             | 0.9                | 8.2                | -8.6                                     | 12.4               | 21.0               | 45.9                      | 36.7               | -9.2               |
|             | jul-TZ  | -9.1             | 7.2                | 16.3               | -12.7                      | 10.8               | 23.5               | -25.1            | 0.4                | 25.5               | 6.7                        | 11.3               | 4.6                | -15.6                      | 5.2                | 20.7               | -7.3             | 0.9                | 8.2                | -8.6                                     | 12.4               | 21.0               | 45.8                      | 36.6               | -9.1               |
|             | maug-TZ | -9.2             | 7.2                | 16.4               | -12.7                      | 10.8               | 23.6               | -25.1            | 0.3                | 25.5               | 6.6                        | 11.3               | 4.6                | -15.7                      | 5.1                | 20.8               | -7.3             | 0.9                | 8.2                | -8.7                                     | 12.4               | 21.1               | 45.9                      | 36.7               | -9.1               |
|             | TZ      | -9.0             | 7.1                | 16.1               | -12.8                      | 10.6               | 23.4               | -24.1            | 0.0                | 24.0               | 7.3                        | 11.0               | 3.6                | -15.1                      | 4.9                | 20.1               | -6.2             | 1.2                | 7.4                | -8.7                                     | 11.9               | 20.6               | 46.4                      | 36.2               | -10.2              |
| M05-2X      | ma-TZVP | -9.3             | 7.9                | 17.1               | -13.7                      | 10.7               | 24.4               | -25.4            | 0.5                | 25.9               | 7.7                        | 11.9               | 4.3                | -16.9                      | 5.0                | 22.0               | -7.0             | 1.2                | 8.3                | -9.6                                     | 12.6               | 22.2               | 46.4                      | 37.6               | -8.9               |
|             | MG3S    | -9.3             | 8.1                | 17.5               | -13.8                      | 10.6               | 24.4               | -26.1            | 0.5                | 26.6               | 6.9                        | 11.5               | 4.6                | -16.9                      | 5.1                | 22.0               | -7.9             | 0.9                | 8.8                | -9.5                                     | 12.6               | 22.2               | 45.5                      | 36.7               | -8.8               |
|             | jun-TZ  | -9.2             | 8.1                | 17.3               | -13.5                      | 10.9               | 24.4               | -26.2            | 0.4                | 26.6               | 6.6                        | 11.4               | 4.8                | -16.6                      | 5.3                | 21.9               | -8.1             | 0.8                | 8.9                | -9.3                                     | 12.9               | 22.2               | 45.0                      | 36.6               | -8.4               |
|             | jul-TZ  | -9.2             | 8.1                | 17.3               | -13.5                      | 10.9               | 24.4               | -26.2            | 0.3                | 26.6               | 6.6                        | 11.3               | 4.8                | -16.7                      | 5.3                | 21.9               | -8.1             | 0.8                | 8.8                | -9.3                                     | 12.9               | 22.2               | 44.9                      | 36.5               | -8.4               |
|             | maug-TZ | -9.3             | 8.1                | 17.4               | -13.6                      | 10.9               | 24.4               | -26.2            | 0.3                | 26.5               | 6.5                        | 11.3               | 4.8                | -16.8                      | 5.2                | 22.0               | -8.0             | 0.8                | 8.8                | -9.4                                     | 12.9               | 22.3               | 45.0                      | 36.6               | -8.4               |
|             | TZ      | -9.2             | 8.0                | 17.1               | -13.7                      | 10.7               | 24.3               | -25.3            | 0.0                | 25.3               | 7.1                        | 11.0               | 4.0                | -16.3                      | 5.1                | 21.4               | -7.2             | 1.0                | 8.2                | -9.5                                     | 12.4               | 21.9               | 45.3                      | 36.1               | -9.3               |
| B3LYP       | ma-TZVP | -13.7            | 0.7                | 14.3               | -14.4                      | 9.0                | 23.3               | -24.9            | -3.0               | 21.9               | 8.2                        | 10.0               | 1.7                | -16.4                      | 2.1                | 18.5               | -10.5            | -5.4               | 5.1                | -9.8                                     | 12.4               | 22.2               | 43.4                      | 33.1               | -10.3              |
|             | MG3S    | -13.6            | 0.9                | 14.5               | -14.4                      | 9.0                | 23.4               | -25.9            | -3.1               | 22.8               | 7.5                        | 9.7                | 2.2                | -16.5                      | 2.2                | 18.7               | -11.3            | -5.6               | 5.7                | -9.7                                     | 12.5               | 22.2               | 42.6                      | 32.6               | -10.0              |
|             | jun-TZ  | -13.5            | 0.8                | 14.3               | -14.3                      | 9.0                | 23.3               | -25.9            | -3.0               | 22.9               | 7.4                        | 9.9                | 2.5                | -16.3                      | 2.4                | 18.7               | -11.3            | -5.5               | 5.9                | -9.6                                     | 12.6               | 22.2               | 42.4                      | 32.8               | -9.7               |
|             | jul-TZ  | -13.5            | 0.7                | 14.3               | -14.3                      | 9.0                | 23.3               | -25.8            | -3.0               | 22.9               | 7.4                        | 9.9                | 2.5                | -16.3                      | 2.4                | 18.6               | -11.3            | -5.5               | 5.8                | -9.6                                     | 12.6               | 22.2               | 42.3                      | 32.7               | -9.6               |

| Methods | R1-2 (MA+H)      |                    |                    | R2-2 (MA+CH <sub>3</sub> ) |                    |                    | R3-2 (MA+OH)     |                    |                    | R4-2 (MA+HO <sub>2</sub> ) |                    |                    | R5-2 (MA+NH <sub>2</sub> ) |                    |                    | R6-2 (MA+O)      |                    |                    | R7-2 (MA+C <sub>2</sub> H <sub>5</sub> ) |                    |                    | R8-2 (MA+O <sub>2</sub> ) |                    |                    |       |
|---------|------------------|--------------------|--------------------|----------------------------|--------------------|--------------------|------------------|--------------------|--------------------|----------------------------|--------------------|--------------------|----------------------------|--------------------|--------------------|------------------|--------------------|--------------------|------------------------------------------|--------------------|--------------------|---------------------------|--------------------|--------------------|-------|
|         | $\Delta H_{1-2}$ | $\Delta E_{1-2}^+$ | $\Delta E_{1-2}^-$ | $\Delta H_{2-2}$           | $\Delta E_{2-2}^+$ | $\Delta E_{2-2}^-$ | $\Delta H_{3-2}$ | $\Delta E_{3-2}^+$ | $\Delta E_{3-2}^-$ | $\Delta H_{4-2}$           | $\Delta E_{4-2}^+$ | $\Delta E_{4-2}^-$ | $\Delta H_{5-2}$           | $\Delta E_{5-2}^+$ | $\Delta E_{5-2}^-$ | $\Delta H_{6-2}$ | $\Delta E_{6-2}^+$ | $\Delta E_{6-2}^-$ | $\Delta H_{7-2}$                         | $\Delta E_{7-2}^+$ | $\Delta E_{7-2}^-$ | $\Delta H_{8-2}$          | $\Delta E_{8-2}^+$ | $\Delta E_{8-2}^-$ |       |
| maug-TZ | -13.6            | 0.7                | 14.3               | -14.3                      | 9.0                | 23.3               | -25.8            | -3.1               | 22.8               | 7.4                        | 9.8                | 2.4                | -16.4                      | 2.3                | 18.7               | -11.2            | -5.5               | 5.7                | -9.7                                     | 12.5               | 22.2               | 42.5                      | 32.7               | -9.7               |       |
|         | TZ               | -13.4              | 0.5                | 13.9                       | -14.5              | 8.6                | 23.1             | -24.6              | -3.6               | 21.0                       | 8.3                | 9.3                | 1.0                        | -15.8              | 1.9                | 17.6             | -9.9               | -5.1               | 4.8                                      | -9.8               | 11.8               | 21.6                      | 43.2               | 31.9               | -11.2 |
| ωB97X-D | ma-TZVP          | -9.7               | 5.2                | 14.9                       | -14.1              | 8.6                | 22.6             | -24.5              | -1.5               | 23.0                       | 9.5                | 12.2               | 2.8                        | -16.3              | 3.3                | 19.6             | -7.8               | -1.0               | 6.8                                      | -9.7               | 10.5               | 20.2                      | 46.0               | 36.0               | -10.0 |
|         | MG3S             | -9.7               | 5.4                | 15.1                       | -14.0              | 8.6                | 22.6             | -25.7              | -2.0               | 23.7                       | 8.5                | 11.4               | 3.0                        | -16.5              | 3.3                | 19.7             | -8.8               | -1.6               | 7.2                                      | -9.6               | 10.5               | 20.1                      | 44.9               | 34.9               | -10.0 |
|         | jun-TZ           | -9.6               | 5.3                | 14.9                       | -14.0              | 8.6                | 22.6             | -25.4              | -1.6               | 23.8                       | 8.7                | 12.0               | 3.2                        | -16.1              | 3.5                | 19.6             | -8.6               | -1.2               | 7.4                                      | -9.6               | 10.6               | 20.2                      | 45.2               | 35.5               | -9.7  |
|         | jul-TZ           | -9.6               | 5.3                | 14.9                       | -14.0              | 8.6                | 22.6             | -25.4              | -1.6               | 23.8                       | 8.7                | 11.9               | 3.3                        | -16.2              | 3.5                | 19.6             | -8.6               | -1.2               | 7.4                                      | -9.6               | 10.6               | 20.2                      | 45.1               | 35.4               | -9.6  |
|         | maug-TZ          | -9.7               | 5.2                | 14.9                       | -14.0              | 8.6                | 22.6             | -25.4              | -1.6               | 23.7                       | 8.6                | 11.9               | 3.2                        | -16.3              | 3.4                | 19.7             | -8.5               | -1.2               | 7.4                                      | -9.6               | 10.6               | 20.2                      | 45.2               | 35.5               | -9.7  |
|         | TZ               | -9.5               | 5.1                | 14.7                       | -14.2              | 8.3                | 22.5             | -24.3              | -2.0               | 22.3                       | 9.4                | 11.6               | 2.2                        | -15.7              | 3.2                | 18.9             | -7.5               | -0.9               | 6.6                                      | -9.8               | 10.0               | 19.7                      | 45.7               | 34.9               | -10.8 |
| MN15-L  | ma-TZVP          | -11.2              | 3.7                | 14.9                       | -11.3              | 12.7               | 24.0             | -22.1              | 1.2                | 23.3                       | 8.5                | 10.1               | 1.5                        | -12.8              | 5.8                | 18.7             | -5.4               | -0.2               | 5.2                                      | -7.0               | 13.7               | 20.7                      | 46.6               | 35.4               | -11.2 |
|         | MG3S             | -11.2              | 3.8                | 15.1                       | -11.4              | 12.5               | 24.0             | -23.7              | 0.8                | 24.5                       | 7.6                | 9.5                | 1.9                        | -13.7              | 5.7                | 19.4             | -6.8               | -0.9               | 5.9                                      | -7.1               | 13.5               | 20.6                      | 45.6               | 24.5               | -11.0 |
|         | jun-TZ           | -11.0              | 3.6                | 14.7                       | -11.2              | 12.5               | 23.7             | -23.6              | 0.9                | 24.5                       | 7.4                | 9.6                | 2.1                        | -13.4              | 5.7                | 19.1             | -6.6               | -0.7               | 6.0                                      | -7.0               | 13.5               | 20.4                      | 45.6               | 34.7               | -10.8 |
|         | jul-TZ           | -11.1              | 3.6                | 14.7                       | -11.3              | 12.4               | 23.7             | -23.7              | 0.8                | 24.4                       | 7.5                | 9.5                | 2.0                        | -13.4              | 5.6                | 19.1             | -6.7               | -0.8               | 5.9                                      | -7.0               | 13.3               | 20.3                      | 45.6               | 34.7               | -10.9 |
|         | maug-TZ          | -11.0              | 3.6                | 14.7                       | -11.2              | 12.5               | 23.7             | -23.5              | 0.9                | 24.4                       | 7.4                | 9.5                | 2.1                        | -13.5              | 5.6                | 19.1             | -6.5               | -0.7               | 5.8                                      | -7.0               | 13.4               | 20.4                      | 45.7               | 34.8               | -10.9 |
|         | TZ               | -10.5              | 3.5                | 14.0                       | -11.2              | 12.1               | 23.3             | -22.1              | 0.5                | 22.6                       | 8.7                | 9.3                | 0.6                        | -12.7              | 5.2                | 17.8             | -5.0               | -0.2               | 4.8                                      | -6.9               | 12.7               | 19.6                      | 46.8               | 34.3               | -12.4 |
| BH&HLYP | ma-TZVP          | -12.0              | 4.5                | 16.5                       | -12.6              | 13.9               | 26.5             | -20.1              | 3.8                | 23.9                       | 9.5                | 18.2               | 8.7                        | -13.5              | 9.1                | 22.6             | -4.6               | 4.5                | 9.1                                      | -8.7               | 16.7               | 25.4                      | 43.6               | 40.4               | -3.2  |
|         | MG3S             | -12.0              | 4.6                | 16.6                       | -12.7              | 13.9               | 26.5             | -21.1              | 3.7                | 24.8                       | 8.8                | 17.9               | 9.1                        | -13.7              | 9.1                | 22.8             | -5.4               | 4.3                | 9.7                                      | -8.7               | 16.8               | 25.5                      | 42.8               | 39.8               | -3.0  |
|         | jun-TZ           | -11.9              | 4.5                | 16.5                       | -12.6              | 13.9               | 26.5             | -21.1              | 3.9                | 25.0                       | 8.8                | 18.1               | 9.3                        | -13.5              | 9.3                | 22.7             | -5.5               | 4.4                | 9.9                                      | -8.6               | 16.8               | 25.4                      | 42.7               | 40.0               | -2.7  |
|         | jul-TZ           | -11.9              | 4.5                | 16.5                       | -12.6              | 13.9               | 26.5             | -21.1              | 3.9                | 24.9                       | 8.7                | 18.1               | 9.3                        | -13.5              | 9.3                | 22.7             | -5.5               | 4.4                | 9.8                                      | -8.6               | 16.8               | 25.4                      | 42.6               | 40.0               | -2.6  |
|         | maug-TZ          | -12.0              | 4.5                | 16.5                       | -12.6              | 13.8               | 26.4             | -21.1              | 3.8                | 24.8                       | 8.7                | 18.0               | 9.2                        | -13.6              | 9.2                | 22.7             | -5.4               | 4.4                | 9.8                                      | -8.7               | 16.8               | 25.4                      | 42.7               | 40.0               | -2.7  |
|         | TZ               | -11.8              | 4.4                | 16.2                       | -12.7              | 13.6               | 26.3             | -20.0              | 3.3                | 23.2                       | 9.4                | 17.6               | 8.2                        | -13.0              | 8.9                | 21.9             | -4.3               | 4.6                | 8.9                                      | -8.7               | 16.2               | 25.0                      | 43.2               | 39.4               | -3.8  |
| PW6B95  | ma-TZVP          | -10.9              | 3.5                | 14.4                       | -15.0              | 8.4                | 23.4             | -24.9              | -2.5               | 22.4                       | 9.1                | 11.4               | 2.3                        | -16.7              | 2.5                | 19.2             | -8.0               | -2.8               | 5.3                                      | -10.3              | 11.4               | 21.6                      | 45.3               | 35.2               | -10.1 |
|         | MG3S             | -10.8              | 3.7                | 14.5                       | -15.0              | 8.4                | 23.4             | -25.8              | -2.7               | 23.2                       | 8.4                | 10.9               | 2.5                        | -16.9              | 2.5                | 19.4             | -8.8               | -3.0               | 5.8                                      | -10.2              | 11.4               | 21.6                      | 44.5               | 34.5               | -10.1 |
|         | jun-TZ           | -10.8              | 3.6                | 14.4                       | -14.9              | 8.4                | 23.4             | -25.7              | -2.4               | 23.3                       | 8.4                | 11.2               | 2.9                        | -16.6              | 2.7                | 19.3             | -8.8               | -2.9               | 5.9                                      | -10.1              | 11.5               | 21.6                      | 44.4               | 34.8               | -9.6  |
|         | jul-TZ           | -10.8              | 3.6                | 14.4                       | -14.9              | 8.4                | 23.4             | -25.7              | -2.5               | 23.3                       | 8.3                | 11.2               | 2.9                        | -16.6              | 2.7                | 19.3             | -8.8               | -2.9               | 5.9                                      | -10.1              | 11.5               | 21.6                      | 44.3               | 34.8               | -9.6  |
|         | maug-TZ          | -10.8              | 3.6                | 14.4                       | -14.9              | 8.4                | 23.7             | -25.7              | -2.5               | 23.2                       | 8.3                | 11.2               | 2.8                        | -16.7              | 2.6                | 19.3             | -8.7               | -2.9               | 5.8                                      | -10.2              | 11.4               | 21.6                      | 44.5               | 34.8               | -9.6  |
|         | TZ               | -10.6              | 3.4                | 14.1                       | -15.1              | 8.1                | 23.1             | -24.5              | -3.0               | 21.5                       | 9.2                | 10.8               | 1.5                        | -16.1              | 2.2                | 18.3             | -7.4               | -2.5               | 4.9                                      | -10.3              | 10.7               | 21.0                      | 45.2               | 34.1               | -11.0 |
| MP      | ma-TZVP          | -9.2               | 4.9                | 14.1                       | -12.8              | 11.4               | 24.2             | -22.1              | 2.1                | 24.2                       | 9.5                | 15.8               | 6.4                        | -14.7              | 6.5                | 21.2             | -5.7               | 2.9                | 8.6                                      | -8.7               | 14.2               | 22.9                      | 44.4               | 38.5               | -5.8  |
|         | MG3S             | -9.1               | 5.1                | 14.2                       | -12.9              | 11.3               | 24.2             | -23.1              | 1.8                | 24.9                       | 8.8                | 15.2               | 6.5                        | -14.9              | 6.4                | 21.3             | -6.5               | 2.5                | 9.0                                      | -8.7               | 14.1               | 22.8                      | 43.7               | 37.7               | -6.0  |

| Methods | R1-2 (MA+H)      |                    |                    | R2-2 (MA+CH <sub>3</sub> ) |                    |                    | R3-2 (MA+OH)     |                    |                    | R4-2 (MA+HO <sub>2</sub> ) |                    |                    | R5-2 (MA+NH <sub>2</sub> ) |                    |                    | R6-2 (MA+O)      |                    |                    | R7-2 (MA+C <sub>2</sub> H <sub>5</sub> ) |                    |                    | R8-2 (MA+O <sub>2</sub> ) |                    |                    |
|---------|------------------|--------------------|--------------------|----------------------------|--------------------|--------------------|------------------|--------------------|--------------------|----------------------------|--------------------|--------------------|----------------------------|--------------------|--------------------|------------------|--------------------|--------------------|------------------------------------------|--------------------|--------------------|---------------------------|--------------------|--------------------|
|         | $\Delta H_{1-2}$ | $\Delta E_{1-2}^+$ | $\Delta E_{1-2}^-$ | $\Delta H_{2-2}$           | $\Delta E_{2-2}^+$ | $\Delta E_{2-2}^-$ | $\Delta H_{3-2}$ | $\Delta E_{3-2}^+$ | $\Delta E_{3-2}^-$ | $\Delta H_{4-2}$           | $\Delta E_{4-2}^+$ | $\Delta E_{4-2}^-$ | $\Delta H_{5-2}$           | $\Delta E_{5-2}^+$ | $\Delta E_{5-2}^-$ | $\Delta H_{6-2}$ | $\Delta E_{6-2}^+$ | $\Delta E_{6-2}^-$ | $\Delta H_{7-2}$                         | $\Delta E_{7-2}^+$ | $\Delta E_{7-2}^-$ | $\Delta H_{8-2}$          | $\Delta E_{8-2}^+$ | $\Delta E_{8-2}^-$ |
| jun-TZ  | -9.1             | 4.9                | 14.1               | -12.8                      | 11.3               | 24.2               | -23.0            | 2.1                | 25.1               | 8.7                        | 15.6               | 6.9                | -14.7                      | 6.6                | 21.3               | -6.6             | 2.7                | 9.2                | -8.6                                     | 14.2               | 22.8               | 43.5                      | 38.0               | -5.5               |
| jul-TZ  | -9.1             | 4.9                | 14.1               | -12.8                      | 11.4               | 24.2               | -23.0            | 2.1                | 25.1               | 8.7                        | 15.6               | 6.9                | -14.7                      | 6.6                | 21.3               | -6.6             | 2.7                | 9.2                | -8.6                                     | 14.2               | 22.8               | 43.4                      | 38.0               | -5.5               |
| maug-TZ | -9.2             | 4.9                | 14.1               | -12.8                      | 11.3               | 24.1               | -23.0            | 2.0                | 25.0               | 8.7                        | 15.5               | 6.8                | -15.0                      | 6.5                | 21.5               | -6.5             | 2.7                | 9.1                | -8.6                                     | 14.2               | 22.8               | 43.6                      | 38.0               | -5.5               |
| TZ      | -9.0             | 4.9                | 13.9               | -12.9                      | 11.1               | 24.0               | -22.0            | 1.6                | 23.6               | 9.3                        | 15.2               | 5.9                | -14.3                      | 6.3                | 20.6               | -5.5             | 2.9                | 8.3                | -8.7                                     | 13.7               | 22.4               | 44.0                      | 37.5               | -6.5               |
| ma-TZVP | -7.6             | 5.7                | 13.3               | -13.8                      | 10.2               | 24.0               | -21.7            | 0.7                | 22.4               | 11.1                       | 15.3               | 4.2                | -14.2                      | 5.4                | 19.6               | -6.0             | 0.6                | 6.6                | -9.4                                     | 13.1               | 22.5               | 47.0                      | 39.1               | -7.9               |
| MG3S    | -7.6             | 5.9                | 13.5               | -13.7                      | 10.0               | 23.7               | -23.3            | 0.1                | 23.3               | 10.0                       | 14.3               | 4.3                | -14.8                      | 5.0                | 19.8               | -7.0             | 0.0                | 7.0                | -9.3                                     | 12.8               | 22.1               | 45.7                      | 37.7               | -8.1               |
| jun-TZ  | -7.5             | 5.8                | 13.3               | -13.5                      | 10.3               | 23.8               | -22.6            | 0.7                | 23.3               | 10.3                       | 14.8               | 4.5                | -14.2                      | 5.5                | 19.7               | -6.5             | 0.6                | 7.1                | -9.2                                     | 13.1               | 22.3               | 46.2                      | 38.5               | -7.7               |
| jul-TZ  | -7.6             | 5.7                | 13.3               | -13.5                      | 10.3               | 23.8               | -22.6            | 0.6                | 23.2               | 10.2                       | 14.8               | 4.6                | -14.2                      | 5.5                | 19.7               | -6.6             | 0.6                | 7.1                | -9.2                                     | 13.1               | 22.3               | 46.1                      | 38.4               | -7.7               |
| maug-TZ | -7.6             | 5.7                | 13.3               | -13.5                      | 10.3               | 23.8               | -22.5            | 0.6                | 23.1               | 10.3                       | 14.8               | 4.5                | -14.5                      | 5.4                | 19.9               | -6.4             | 0.6                | 7.1                | -9.2                                     | 13.1               | 22.3               | 46.2                      | 38.5               | -7.7               |
| TZ      | -7.4             | 5.6                | 13.0               | -13.7                      | 10.0               | 23.7               | -21.5            | 0.2                | 21.7               | 11.0                       | 14.5               | 3.5                | -13.7                      | 5.2                | 18.8               | -5.4             | 0.9                | 6.2                | -9.3                                     | 12.6               | 21.9               | 46.7                      | 38.0               | -8.7               |



Table S3.

Optimized geometries and frequencies of the involved species for the H-abstraction systems MA + H/CH<sub>3</sub>/OH /HO<sub>2</sub>/NH<sub>2</sub>/O/C<sub>2</sub>H<sub>5</sub>/O<sub>2</sub>/Cl using the M08-HX/ma-TZVP method.

| Geometry                      |           |           |           | Frequency |         |                  | Geometry |           |           |           | Frequency |                 |  |
|-------------------------------|-----------|-----------|-----------|-----------|---------|------------------|----------|-----------|-----------|-----------|-----------|-----------------|--|
| <b>Reactants</b>              |           |           |           |           |         |                  |          |           |           |           |           |                 |  |
| MA                            |           |           |           |           |         |                  |          |           |           |           |           |                 |  |
| N                             | -0.746306 | -0.000001 | -0.118898 |           |         |                  |          |           |           |           |           |                 |  |
| H                             | -1.152529 | -0.814739 | 0.322787  | 291.16    | 827.36  | 967.80           |          |           |           |           |           |                 |  |
| C                             | 0.703922  | -0.000010 | 0.017732  | 1092.44   | 1166.39 | 1338.14          |          |           |           |           |           |                 |  |
| H                             | 1.115090  | -0.879849 | -0.486977 | 1445.90   | 1487.78 | 1506.81          |          |           |           |           |           |                 |  |
| H                             | 1.115096  | 0.879937  | -0.486817 | 1662.01   | 2991.73 | 3079.76          |          |           |           |           |           |                 |  |
| H                             | 1.075497  | -0.000034 | 1.054202  | 3118.31   | 3551.48 | 3636.31          |          |           |           |           |           |                 |  |
| H                             | -1.152543 | 0.814754  | 0.322705  |           |         |                  |          |           |           |           |           |                 |  |
| DMA-1                         |           |           |           |           |         | DMA-2            |          |           |           |           |           |                 |  |
| N                             | -0.798527 | 0.152991  | -0.000080 |           |         |                  | N        | 0.651714  | 0.000000  | 0.090095  |           |                 |  |
| C                             | 0.625379  | -0.013124 | -0.000067 | 207.03    | 950.52  | 1000.81          | H        | 1.132497  | -0.835430 | -0.203942 | 437.39    | 577.29 643.32   |  |
| H                             | 1.127113  | 0.958334  | -0.001270 | 1078.09   | 1328.05 | 1387.67          | C        | -0.723669 | 0.000000  | -0.072563 | 930.47    | 1252.51 1316.68 |  |
| H                             | 0.962984  | -0.583050 | 0.881415  | 1468.28   | 1473.71 | 2971.47          | H        | -1.242490 | -0.932548 | 0.106299  | 1478.02   | 1652.01 3182.62 |  |
| H                             | 0.963636  | -0.586044 | -0.879338 | 3022.81   | 3112.99 | 3436.05          | H        | -1.242491 | 0.932547  | 0.106300  | 3296.86   | 3594.61 3702.56 |  |
| H                             | -1.216320 | -0.781427 | 0.000159  |           |         |                  | H        | 1.132498  | 0.835429  | -0.203944 |           |                 |  |
| <b>R1 MA + H</b>              |           |           |           |           |         |                  |          |           |           |           |           |                 |  |
| H                             |           |           |           |           |         | H <sub>2</sub>   |          |           |           |           |           |                 |  |
| H                             | 0.000000  | 0.000000  | 0.000000  |           |         |                  | H        | 0.000000  | 0.000000  | 0.372855  |           |                 |  |
|                               |           |           |           |           |         |                  | H        | 0.000000  | 0.000000  | -0.372855 | 4417.97   |                 |  |
| TS1-1                         |           |           |           |           |         | TS1-2            |          |           |           |           |           |                 |  |
| N                             | 0.579122  | -0.382501 | -0.150693 |           |         |                  | N        | 0.837761  | 0.038963  | 0.000015  |           |                 |  |
| H                             | 1.343416  | 0.612719  | -0.111816 | -1549.89  |         |                  | H        | 1.124554  | 0.545399  | -0.825544 |           |                 |  |
| C                             | -0.768830 | 0.131633  | 0.021723  | 182.27    | 372.12  | 704.54           | C        | -0.538608 | -0.307822 | 0.000026  | 301.01    | 314.42 512.20   |  |
| H                             | -1.031588 | 0.761547  | -0.832800 | 976.00    | 988.00  | 1067.65          | H        | -0.819219 | -0.863850 | -0.898258 | 752.82    | 973.95 1142.02  |  |
| H                             | -1.462106 | -0.719778 | 0.034569  | 1137.83   | 1279.70 | 1387.98          | H        | -0.819360 | -0.863265 | 0.898626  | 1171.23   | 1300.25 1326.40 |  |
| H                             | -0.928370 | 0.703570  | 0.945709  | 1417.74   | 1465.35 | 1491.65          | H        | -1.299092 | 0.668941  | -0.000458 | 1384.07   | 1388.68 1462.53 |  |
| H                             | 0.862811  | -0.856183 | 0.709275  | 1763.02   | 3007.00 | 3070.18          | H        | 1.124462  | 0.545721  | 0.825407  | 1662.58   | 3068.00 3148.43 |  |
| H                             | 1.774961  | 1.385832  | 0.179580  | 3117.66   | 3472.59 |                  | H        | -1.944028 | 1.541248  | -0.000031 | 3572.78   | 3667.98         |  |
| <b>R2 MA + CH<sub>3</sub></b> |           |           |           |           |         |                  |          |           |           |           |           |                 |  |
| CH <sub>3</sub>               |           |           |           |           |         | CH <sub>4</sub>  |          |           |           |           |           |                 |  |
| C                             | 0.000000  | 0.000000  | 0.000023  |           |         |                  | C        | 0.000000  | 0.000000  | 0.000000  |           |                 |  |
| H                             | 0.000000  | 1.080901  | -0.000047 | 536.57    | 1405.71 | 1405.71          | H        | 0.630332  | 0.630332  | 0.630332  | 1325.68   | 1325.68 1325.68 |  |
| H                             | -0.936088 | -0.540451 | -0.000047 | 3143.03   | 3323.03 | 3323.25          | H        | -0.630332 | -0.630332 | 0.630332  | 1546.14   | 1546.14 3034.36 |  |
| H                             | 0.936088  | -0.540451 | -0.000047 |           |         |                  | H        | -0.630332 | 0.630332  | -0.630332 | 3160.69   | 3160.69 3160.69 |  |
|                               |           |           |           |           |         |                  | H        | 0.630332  | -0.630332 | -0.630332 |           |                 |  |
| TS2-1                         |           |           |           |           |         | TS2-2            |          |           |           |           |           |                 |  |
| N                             | 0.580652  | 0.758532  | -0.149507 |           |         |                  | N        | -1.545939 | -0.426494 | -0.000007 |           |                 |  |
| H                             | -0.604411 | 0.387296  | -0.186452 | -1944.36  |         |                  | H        | -1.470346 | -1.006628 | -0.823905 |           |                 |  |
| C                             | 1.362925  | -0.453817 | 0.020767  | 69.98     | 139.51  | 163.96           | C        | -0.633156 | 0.666204  | -0.000008 | 18.72     | 123.81 236.32   |  |
| H                             | 1.268898  | -1.077180 | -0.873969 | 387.35    | 550.00  | 566.52           | H        | -0.736926 | 1.280425  | -0.898525 | 378.78    | 471.75 539.71   |  |
| H                             | 2.422385  | -0.185041 | 0.125430  | 805.16    | 1000.20 | 1069.31          | H        | -0.736909 | 1.280404  | 0.898525  | 636.24    | 774.17 988.57   |  |
| H                             | 1.087428  | -1.060238 | 0.896950  | 1089.40   | 1141.55 | 1301.54          | H        | 0.589605  | 0.302118  | -0.000036 | 1093.47   | 1159.38 1166.12 |  |
| H                             | 0.587876  | 1.277642  | 0.729674  | 1359.23   | 1414.69 | 1421.04          | H        | -1.470422 | -1.006559 | 0.823945  | 1342.93   | 1403.89 1406.29 |  |
| C                             | -1.805663 | -0.175675 | 0.014886  | 1431.26   | 1469.79 | 1491.05          | C        | 1.967119  | -0.177906 | 0.000001  | 1440.59   | 1445.29 1463.54 |  |
| H                             | -2.465628 | 0.654488  | 0.261327  | 1508.40   | 2990.94 | 3059.52          | H        | 2.037141  | -0.769324 | 0.910797  | 1658.20   | 3071.30 3079.15 |  |
| H                             | -1.678107 | -0.891449 | 0.825722  | 3072.77   | 3107.04 | 3213.77          | H        | 2.041862  | -0.756491 | -0.918623 | 3152.77   | 3225.39 3228.18 |  |
| H                             | -2.026577 | -0.638285 | -0.946048 | 3216.29   | 3491.67 |                  | H        | 2.563786  | 0.731732  | 0.007913  | 3562.01   | 3656.18         |  |
| <b>R3 MA + OH</b>             |           |           |           |           |         |                  |          |           |           |           |           |                 |  |
| OH                            |           |           |           |           |         | H <sub>2</sub> O |          |           |           |           |           |                 |  |
| O                             | 0.000000  | 0.000000  | 0.107952  |           |         |                  | H        | 0.765650  | -0.459860 | 0.000000  |           |                 |  |
| H                             | 0.000000  | 0.000000  | -0.863615 | 3794.45   |         |                  | O        | 0.000000  | 0.114973  | 0.000000  | 1610.87   | 3888.78 3993.46 |  |
|                               |           |           |           |           |         |                  | H        | -0.765650 | -0.459927 | 0.000000  |           |                 |  |
| RC3                           |           |           |           |           |         |                  |          |           |           |           |           |                 |  |

|                         |           |           |           |                               |         |         |   |           |           |           |
|-------------------------|-----------|-----------|-----------|-------------------------------|---------|---------|---|-----------|-----------|-----------|
| N                       | -0.592213 | 0.670378  | 0.000313  |                               |         |         |   |           |           |           |
| H                       | -0.808908 | 1.234031  | -0.813328 | 49.81                         | 107.95  | 220.64  |   |           |           |           |
| C                       | -1.381138 | -0.561838 | 0.000051  | 323.69                        | 545.96  | 734.79  |   |           |           |           |
| H                       | -2.467560 | -0.401278 | 0.000027  | 912.97                        | 976.44  | 1082.35 |   |           |           |           |
| H                       | -1.122390 | -1.155679 | -0.881235 | 1183.76                       | 1338.69 | 1447.70 |   |           |           |           |
| H                       | -1.122473 | -1.155984 | 0.881152  | 1491.09                       | 1506.31 | 1653.50 |   |           |           |           |
| H                       | -0.808439 | 1.233372  | 0.814535  | 3017.63                       | 3098.43 | 3130.49 |   |           |           |           |
| O                       | 2.211950  | -0.122139 | -0.001109 | 3483.86                       | 3539.70 | 3619.45 |   |           |           |           |
| H                       | 1.274961  | 0.188266  | -0.000468 |                               |         |         |   |           |           |           |
| TS3-1                   |           |           |           | PC3-1                         |         |         |   |           |           |           |
| N                       | 0.456575  | 0.731340  | -0.136505 | -655.19                       |         |         | N | 0.781506  | 0.774977  | 0.000079  |
| H                       | -0.530030 | 0.507524  | -0.482797 | 88.85                         | 128.77  | 178.01  | H | -1.158119 | 0.435234  | -0.005058 |
| C                       | 1.285155  | -0.439968 | 0.041336  | 370.46                        | 651.60  | 721.60  | C | 1.288374  | -0.565646 | 0.004522  |
| H                       | 0.997429  | -1.053266 | 0.905730  | 977.89                        | 1092.55 | 1107.40 | H | 1.941304  | -0.738282 | 0.875205  |
| H                       | 1.222836  | -1.062110 | -0.854119 | 1312.94                       | 1429.42 | 1464.25 | H | 0.461590  | -1.280747 | 0.026164  |
| H                       | 2.328071  | -0.127919 | 0.174038  | 1488.71                       | 1614.40 | 2392.60 | H | 1.908277  | -0.754920 | -0.886671 |
| H                       | 0.423967  | 1.316573  | 0.691098  | 3014.59                       | 3080.31 | 3138.95 | H | 1.566097  | 1.428985  | -0.016879 |
| O                       | -1.671326 | -0.269915 | -0.062724 | 3581.85                       | 3838.77 |         | O | -1.902826 | -0.182531 | -0.014012 |
| H                       | -1.978616 | 0.098946  | 0.775361  |                               |         |         | H | -2.697320 | 0.339013  | 0.091651  |
| TS3-2                   |           |           |           | PC3-2                         |         |         |   |           |           |           |
| N                       | 1.125850  | -0.592281 | -0.015001 | -1188.00                      |         |         | N | 0.870912  | -0.648541 | -0.000227 |
| H                       | 1.839727  | -0.736555 | -0.711967 | 129.28                        | 141.62  | 238.04  | H | 1.025163  | -1.202099 | -0.830634 |
| C                       | 0.583744  | 0.736238  | 0.006453  | 405.08                        | 626.31  | 764.91  | C | 1.479018  | 0.602491  | 0.001047  |
| H                       | 0.885416  | 1.342053  | 0.868868  | 954.55                        | 1031.19 | 1121.37 | H | 1.504040  | 1.145511  | 0.935661  |
| H                       | 0.792618  | 1.270898  | -0.922800 | 1297.28                       | 1366.89 | 1386.19 | H | 1.519284  | 1.139916  | -0.936265 |
| H                       | -0.577203 | 0.675071  | 0.070328  | 1460.58                       | 1650.23 | 1737.65 | H | -2.148552 | 0.984805  | -0.008802 |
| H                       | 1.451234  | -0.915718 | 0.883109  | 3048.48                       | 3142.24 | 3595.87 | H | 1.012679  | -1.197853 | 0.835223  |
| O                       | -1.812213 | -0.124051 | 0.006623  | 3690.82                       | 3766.92 |         | O | -2.091688 | 0.029663  | 0.000765  |
| H                       | -1.277497 | -0.914803 | -0.174236 |                               |         |         | H | -1.149599 | -0.182749 | -0.005994 |
| R4 MA + HO <sub>2</sub> |           |           |           |                               |         |         |   |           |           |           |
| HO <sub>2</sub>         |           |           |           | H <sub>2</sub> O <sub>2</sub> |         |         |   |           |           |           |
| O                       | 0.054784  | 0.705690  | 0.000000  |                               |         |         | H | -1.020957 | 0.638878  | 0.447618  |
| O                       | 0.054784  | -0.596889 | 0.000000  | 1258.11                       | 1468.35 | 3739.65 | O | -0.700390 | -0.116382 | -0.055979 |
| H                       | -0.876549 | -0.870403 | 0.000000  |                               |         |         | O | 0.700456  | 0.116410  | -0.055915 |
|                         |           |           |           |                               |         |         | H | 1.020426  | -0.639104 | 0.447533  |
| RC4                     |           |           |           |                               |         |         |   |           |           |           |
| N                       | -1.086606 | 0.670008  | -0.291319 |                               |         |         |   |           |           |           |
| H                       | -0.964258 | 0.618920  | -1.296692 | 45.88                         | 100.66  | 114.14  |   |           |           |           |
| C                       | -1.646498 | -0.586295 | 0.216428  | 190.53                        | 284.89  | 432.47  |   |           |           |           |
| H                       | -0.939491 | -1.393659 | 0.007954  | 810.04                        | 962.52  | 985.57  |   |           |           |           |
| H                       | -1.762237 | -0.517318 | 1.301580  | 1076.46                       | 1193.34 | 1292.23 |   |           |           |           |
| H                       | -2.619240 | -0.845207 | -0.220155 | 1337.49                       | 1445.48 | 1491.58 |   |           |           |           |
| H                       | -1.707448 | 1.448125  | -0.103722 | 1504.60                       | 1636.13 | 1646.75 |   |           |           |           |
| O                       | 1.653632  | -0.587596 | -0.326894 | 3026.42                       | 3077.85 | 3109.84 |   |           |           |           |
| O                       | 1.497741  | 0.431741  | 0.468104  | 3140.66                       | 3540.40 | 3621.7  |   |           |           |           |
| H                       | 0.550659  | 0.717991  | 0.307862  |                               |         |         |   |           |           |           |
| TS4-1                   |           |           |           | PC4-1                         |         |         |   |           |           |           |
| N                       | 0.924749  | 0.598554  | -0.245234 | -2595.42                      |         |         | N | -1.253823 | -0.720286 | -0.236514 |
| H                       | -0.102467 | -0.091059 | -0.372709 | 54.80                         | 99.03   | 130.46  | H | 0.604475  | -0.902387 | 0.077168  |
| C                       | 2.067502  | -0.210287 | 0.094078  | 223.95                        | 386.49  | 526.84  | C | -1.751960 | 0.558656  | 0.173233  |
| H                       | 2.293934  | -0.903889 | -0.719503 | 701.06                        | 994.14  | 1029.95 | H | -0.932166 | 1.187054  | 0.528437  |
| H                       | 2.940619  | 0.438172  | 0.253233  | 1038.83                       | 1100.28 | 1251.41 | H | -2.262979 | 1.067433  | -0.659821 |
| H                       | 1.921058  | -0.783869 | 1.022167  | 1350.98                       | 1407.12 | 1414.21 | H | -2.503861 | 0.446437  | 0.971202  |
| H                       | 0.708688  | 1.223778  | 0.532418  | 1463.09                       | 1484.77 | 1631.25 | H | -2.027720 | -1.288687 | -0.584731 |
| O                       | -1.051624 | -0.704269 | -0.060639 | 2991.16                       | 3052.06 | 3126.25 | O | 1.525856  | -0.650139 | 0.278834  |
| O                       | -1.981210 | 0.294783  | 0.198176  | 3493.58                       | 3833.46 |         | O | 1.516536  | 0.711733  | -0.129089 |
| H                       | -2.377419 | 0.464598  | -0.663734 |                               |         |         | H | 2.071633  | 0.687463  | -0.914018 |
| TS4-2                   |           |           |           | PC4-2                         |         |         |   |           |           |           |
| N                       | -1.548801 | -0.655327 | 0.137973  | -1596.33                      |         |         | N | 1.499855  | -0.633177 | -0.264095 |
| H                       | -1.014599 | -1.372806 | -0.333085 | 66.93                         | 138.15  | 215.91  | H | 0.700236  | -1.228016 | -0.099123 |
| C                       | -1.211136 | 0.650284  | -0.238904 | 332.81                        | 449.11  | 569.84  | C | 1.491713  | 0.584749  | 0.377585  |

|                               |           |           |           |                         |         |                 |   |           |           |           |                         |         |         |
|-------------------------------|-----------|-----------|-----------|-------------------------|---------|-----------------|---|-----------|-----------|-----------|-------------------------|---------|---------|
| H                             | -1.272976 | 0.809258  | -1.318571 | 595.04                  | 744.89  | 975.63          | H | 1.106485  | 0.592903  | 1.391684  | 730.86                  | 946.52  | 1029.38 |
| H                             | -1.757445 | 1.410710  | 0.322874  | 1071.39                 | 1160.89 | 1223.06         | H | 2.270548  | 1.290418  | 0.115247  | 1274.98                 | 1321.76 | 1380.19 |
| H                             | 0.022352  | 0.852710  | 0.031019  | 1291.53                 | 1351.06 | 1403.85         | H | -0.511888 | 0.938352  | -0.302584 | 1475.13                 | 1515.70 | 1650.93 |
| H                             | -1.550093 | -0.814872 | 1.135202  | 1460.39                 | 1515.47 | 1664.08         | H | 1.819346  | -0.646921 | -1.219077 | 3156.34                 | 3271.08 | 3583.34 |
| O                             | 1.268919  | 0.679973  | 0.294015  | 3072.09                 | 3161.13 | 3577.38         | O | -1.412744 | 0.607531  | -0.479039 | 3618.66                 | 3699.36 | 3866.53 |
| O                             | 1.455913  | -0.635345 | -0.095724 | 3675.26                 | 3832.59 |                 | O | -1.434900 | -0.569018 | 0.314592  |                         |         |         |
| H                             | 1.882530  | -0.556446 | -0.956159 |                         |         |                 | H | -2.052838 | -0.331094 | 1.012586  |                         |         |         |
| <b>R5 MA + NH<sub>2</sub></b> |           |           |           |                         |         |                 |   |           |           |           |                         |         |         |
| NH <sub>2</sub>               |           |           |           |                         |         | NH <sub>3</sub> |   |           |           |           |                         |         |         |
| N                             | 0.000000  | 0.000000  | 0.140072  | 1526.30 3399.02 3492.45 |         |                 | H | -0.914521 | 0.236266  | 0.254512  | 1029.36 1665.46 1665.87 |         |         |
| H                             | 0.000000  | 0.808739  | -0.490253 |                         |         |                 | N | -0.000022 | 0.000019  | -0.109056 | 3523.40 3658.98 3659.64 |         |         |
| H                             | 0.000000  | -0.808739 | -0.490253 |                         |         |                 | H | 0.661993  | 0.673826  | 0.254461  |                         |         |         |
|                               |           |           |           |                         |         |                 | H | 0.252683  | -0.910224 | 0.254422  |                         |         |         |
| <b>RC5</b>                    |           |           |           |                         |         |                 |   |           |           |           |                         |         |         |
| N                             | -0.888196 | 0.749710  | 0.010703  | 37.11 85.44 116.05      |         |                 |   |           |           |           |                         |         |         |
| H                             | -1.072117 | 1.142023  | -0.904554 | 174.05 271.33 341.46    |         |                 |   |           |           |           |                         |         |         |
| C                             | -1.124808 | -0.692272 | 0.013688  | 408.12 870.62 972.03    |         |                 |   |           |           |           |                         |         |         |
| H                             | -0.408719 | -1.175587 | -0.658140 | 1082.43 1176.08 1336.98 |         |                 |   |           |           |           |                         |         |         |
| H                             | -0.935065 | -1.085849 | 1.017161  | 1449.77 1487.48 1505.63 |         |                 |   |           |           |           |                         |         |         |
| H                             | -2.140362 | -0.990196 | -0.283756 | 1547.79 1655.39 3014.13 |         |                 |   |           |           |           |                         |         |         |
| H                             | -1.500501 | 1.220622  | 0.664778  | 3095.84 3129.41 3363.03 |         |                 |   |           |           |           |                         |         |         |
| N                             | 2.124478  | -0.132291 | -0.084360 | 3484.39 3543.09 3625.81 |         |                 |   |           |           |           |                         |         |         |
| H                             | 1.282078  | 0.422550  | 0.125970  |                         |         |                 |   |           |           |           |                         |         |         |
| H                             | 2.869560  | 0.298133  | 0.472007  |                         |         |                 |   |           |           |           |                         |         |         |
| TSS-1                         |           |           |           |                         |         | PC5-1           |   |           |           |           |                         |         |         |
| N                             | 0.485232  | 0.740557  | -0.123901 | -2009.74                |         |                 | N | 0.969561  | 0.786101  | 0.000404  | 92.71 124.87 127.84     |         |         |
| H                             | -0.634057 | 0.379882  | -0.357215 | 94.63 111.13 162.93     |         |                 | H | -1.261250 | 0.547934  | -0.002186 | 156.14 162.73 285.79    |         |         |
| C                             | 1.336886  | -0.422288 | 0.023491  | 435.39 631.87 717.18    |         |                 | C | 1.299953  | -0.609885 | 0.000273  | 351.96 957.13 1006.03   |         |         |
| H                             | 1.213249  | -1.074081 | -0.846638 | 816.03 1002.88 1089.56  |         |                 | H | 0.387205  | -1.211975 | 0.008213  | 1059.66 1081.36 1327.23 |         |         |
| H                             | 2.387043  | -0.101237 | 0.049719  | 1091.97 1311.21 1418.42 |         |                 | H | 1.901527  | -0.872493 | -0.885641 | 1386.07 1473.43 1475.02 |         |         |
| H                             | 1.153513  | -1.014026 | 0.933158  | 1421.73 1468.26 1489.56 |         |                 | H | 1.917811  | -0.870886 | 0.875207  | 1656.58 1678.49 2968.62 |         |         |
| H                             | 0.462800  | 1.266692  | 0.747736  | 1557.47 1618.20 2990.93 |         |                 | H | 1.840487  | 1.322349  | -0.001785 | 3021.11 3120.47 3461.80 |         |         |
| N                             | -1.750412 | -0.210720 | -0.110519 | 3056.10 3111.85 3467.28 |         |                 | N | -2.025372 | -0.122896 | -0.000004 | 3489.58 3618.03 3651.64 |         |         |
| H                             | -2.236743 | 0.408218  | 0.539749  | 3526.81 3563.55         |         |                 | H | -2.598982 | 0.049941  | -0.815685 |                         |         |         |
| H                             | -1.510868 | -1.040577 | 0.433484  |                         |         |                 | H | -2.595844 | 0.052005  | 0.817437  |                         |         |         |
| TSS-2                         |           |           |           |                         |         | PC5-2           |   |           |           |           |                         |         |         |
| N                             | -1.523679 | -0.408341 | 0.000010  | -1224.40                |         |                 | N | 1.055675  | -0.683935 | -0.138198 | 79.31 117.04 146.57     |         |         |
| H                             | -1.460457 | -0.991634 | -0.822923 | 114.62 128.60 200.10    |         |                 | H | 1.536501  | -1.335830 | 0.460099  | 183.92 230.58 301.66    |         |         |
| C                             | -0.579694 | 0.654188  | -0.000013 | 409.30 553.41 720.49    |         |                 | C | 1.322326  | 0.653369  | 0.072633  | 513.97 631.08 741.60    |         |         |
| H                             | -0.672236 | 1.273268  | -0.896827 | 786.02 833.93 997.06    |         |                 | H | 2.324752  | 0.925731  | 0.378759  | 954.53 1067.56 1266.31  |         |         |
| H                             | -0.672270 | 1.273343  | 0.896745  | 1170.41 1227.59 1348.60 |         |                 | H | 0.755716  | 1.361265  | -0.521362 | 1334.33 1476.22 1652.78 |         |         |
| H                             | 0.569955  | 0.229964  | 0.000030  | 1363.15 1462.95 1471.02 |         |                 | H | -1.452378 | 0.669005  | 0.611824  | 1661.80 1665.46 3163.20 |         |         |
| H                             | -1.460454 | -0.991599 | 0.822967  | 1546.24 1662.87 3064.44 |         |                 | H | 0.076455  | -0.906153 | -0.277438 | 3273.92 3506.81 3540.09 |         |         |
| N                             | 1.900196  | -0.319609 | 0.000029  | 3140.78 3435.78 3533.52 |         |                 | N | -1.931995 | 0.008683  | 0.008206  | 3632.65 3654.00 3681.03 |         |         |
| H                             | 2.268929  | 0.188452  | -0.808431 | 3568.72 3660.12         |         |                 | H | -2.657292 | -0.441396 | 0.552626  |                         |         |         |
| H                             | 2.269076  | 0.188730  | 0.808247  |                         |         |                 | H | -2.383472 | 0.533927  | -0.730361 |                         |         |         |
| <b>R6 MA + O</b>              |           |           |           |                         |         |                 |   |           |           |           |                         |         |         |
| O                             |           |           |           |                         |         |                 |   |           |           |           |                         |         |         |
| O                             | 0.000000  | 0.000000  | 0.000000  |                         |         |                 |   |           |           |           |                         |         |         |
| <b>RC6</b>                    |           |           |           |                         |         |                 |   |           |           |           |                         |         |         |
| N                             | -0.422899 | 0.728693  | -0.010153 | 72.66 88.05 195.03      |         |                 |   |           |           |           |                         |         |         |
| H                             | -0.662110 | 1.288464  | 0.796010  | 305.46 758.55 962.36    |         |                 |   |           |           |           |                         |         |         |
| C                             | -1.061264 | -0.574775 | -0.008308 | 1099.38 1154.15 1326.26 |         |                 |   |           |           |           |                         |         |         |
| H                             | -0.699374 | -1.151768 | -0.864954 | 1445.80 1483.22 1502.01 |         |                 |   |           |           |           |                         |         |         |
| H                             | -0.766944 | -1.116414 | 0.895908  | 1648.46 3002.83 3086.78 |         |                 |   |           |           |           |                         |         |         |
| H                             | -2.160065 | -0.546073 | -0.051045 | 3123.96 3571.47 3667.92 |         |                 |   |           |           |           |                         |         |         |
| H                             | -0.601182 | 1.255928  | -0.853178 |                         |         |                 |   |           |           |           |                         |         |         |
| O                             | 1.778708  | -0.153855 | 0.053222  |                         |         |                 |   |           |           |           |                         |         |         |
| TS6-1                         |           |           |           |                         |         | PC6-1           |   |           |           |           |                         |         |         |
| N                             | 0.362755  | 0.711932  | -0.134568 | -1887.59                |         |                 | N | 0.517970  | 0.541472  | 0.000173  | 27.11 54.83 202.92      |         |         |
| H                             | -0.771329 | 0.342157  | -0.322892 | 143.89 148.54 443.19    |         |                 | H | -1.385289 | 0.089589  | 0.000165  | 284.79 519.20 610.74    |         |         |



|            |           |           |           |          |         |         |    |           |           |           |                         |
|------------|-----------|-----------|-----------|----------|---------|---------|----|-----------|-----------|-----------|-------------------------|
| H          | 1.156853  | -1.172047 | -0.835439 | 1661.54  | 3095.52 | 3196.03 | H  | 1.764455  | -0.824058 | -1.111647 |                         |
| O          | -1.354370 | 0.614885  | -0.000250 |          | 3591.57 | 3692.32 | O  | -1.467647 | 0.546177  | -0.337100 |                         |
| O          | -1.459122 | -0.651560 | 0.000198  |          |         |         | O  | -1.513509 | -0.581187 | 0.304081  |                         |
| R9 MA + Cl |           |           |           |          |         |         |    |           |           |           |                         |
| Cl         |           |           |           |          |         | HCl     |    |           |           |           |                         |
| Cl         | -1.717103 | -0.078219 | 0.000074  |          |         |         | H  | 0.000000  | 0.000000  | -1.204502 | 2999.39                 |
|            |           |           |           |          |         |         | Cl | 0.000000  | 0.000000  | 0.070853  |                         |
| RC9        |           |           |           |          |         |         |    |           |           |           |                         |
| N          | 1.284752  | 0.680101  | 0.037704  |          |         |         |    |           |           |           |                         |
| H          | 0.957687  | 1.129904  | -0.800264 | 149.76   | 160.02  | 358.31  |    |           |           |           |                         |
| C          | 1.342783  | -0.767032 | 0.014807  | 441.48   | 717.41  | 949.71  |    |           |           |           |                         |
| H          | 1.910652  | -1.076458 | -0.856217 | 1092.92  | 1157.75 | 1320.00 |    |           |           |           |                         |
| H          | 1.868310  | -1.106101 | 0.901273  | 1474.18  | 1516.04 | 1521.43 |    |           |           |           |                         |
| H          | 0.350091  | -1.218082 | -0.017029 | 1652.03  | 3086.47 | 3173.15 |    |           |           |           |                         |
| H          | 0.916671  | 1.100810  | 0.873870  | 3208.25  | 3606.73 | 3709.81 |    |           |           |           |                         |
| Cl         | 3.509631  | 1.451821  | 0.107810  |          |         |         |    |           |           |           |                         |
| TS9-1      |           |           |           |          |         | PC9-1   |    |           |           |           |                         |
| N          | -1.065101 | 0.700042  | -0.124106 |          |         |         | N  | 1.242333  | 0.684404  | -0.000840 |                         |
| H          | 0.195978  | 0.456382  | -0.309373 | -1109.37 |         |         | H  | -0.480374 | 0.395802  | -0.000567 | 55.66 87.13 147.40      |
| C          | -1.885485 | -0.466784 | 0.017531  | 112.89   | 120.49  | 355.26  | C  | 2.051634  | -0.494677 | -0.000164 | 295.23 692.04 726.56    |
| H          | -1.632212 | -1.187069 | -0.752295 | 594.73   | 949.57  | 1001.77 | H  | 1.422413  | -1.379183 | -0.011596 | 978.56 1019.82 1107.04  |
| H          | -1.745682 | -0.922426 | 1.000872  | 1061.13  | 1131.76 | 1223.26 | H  | 2.715400  | -0.505981 | -0.870240 | 1332.65 1416.13 1499.37 |
| H          | -2.936438 | -0.181651 | -0.064241 | 1372.64  | 1429.38 | 1492.71 | H  | 2.695032  | -0.516045 | 0.885156  | 1508.80 2251.23 3040.72 |
| H          | -1.240483 | 1.377199  | 0.612576  | 1514.62  | 3062.59 | 3111.33 | H  | 1.832147  | 1.512367  | 0.002858  | 3081.96 3181.08 3507.08 |
| Cl         | 1.536909  | -0.096590 | 0.016236  | 3202.00  | 3530.06 |         | Cl | -1.717103 | -0.078219 | 0.000074  |                         |
| TS9-2      |           |           |           |          |         | PC9-2   |    |           |           |           |                         |
| N          | 1.425186  | 0.750137  | 0.000023  |          |         |         | N  | 1.918959  | -0.560757 | 0.000026  |                         |
| H          | 1.038080  | 1.165385  | -0.831969 | -1772.82 |         |         | H  | 1.793732  | -1.100456 | 0.838246  | 82.59 174.87 175.04     |
| C          | 1.483002  | -0.667592 | 0.000021  | 139.16   | 148.21  | 374.94  | C  | 1.408910  | 0.715986  | 0.000007  | 528.98 629.60 677.75    |
| H          | 1.987888  | -1.029625 | -0.890946 | 561.66   | 812.67  | 953.80  | H  | 1.486776  | 1.264631  | 0.924696  | 722.38 852.71 961.11    |
| H          | 1.987811  | -1.029626 | 0.891031  | 1144.19  | 1332.09 | 1405.62 | H  | 1.487168  | 1.264772  | -0.924572 | 1276.15 1337.17 1506.07 |
| H          | 0.448082  | -1.099366 | -0.000025 | 1470.73  | 1498.62 | 1656.94 | H  | -0.400586 | 0.410560  | 0.000156  | 1672.68 2185.64 3205.43 |
| H          | 1.038061  | 1.165382  | 0.832006  | 2052.20  | 3135.60 | 3195.55 | H  | 1.794280  | -1.100194 | -0.838407 | 3314.86 3613.63 3714.38 |
| Cl         | -1.492602 | -0.024562 | -0.000022 | 3573.18  | 3687.04 |         | Cl | -1.649855 | -0.065290 | -0.000020 |                         |

Table S4.

Optimized geometries and frequencies of the involved species for the H-abstraction systems EA + H/CH<sub>3</sub>/OH /HO<sub>2</sub>/NH<sub>2</sub>/O/C<sub>2</sub>H<sub>5</sub>/O<sub>2</sub>/Cl using the M08-HX/ma-TZVP method.

| Geometry                      |           |           |           | Frequency |         |         | Geometry |           |           |           | Frequency |         |         |
|-------------------------------|-----------|-----------|-----------|-----------|---------|---------|----------|-----------|-----------|-----------|-----------|---------|---------|
| <b>Reactants</b>              |           |           |           |           |         |         |          |           |           |           |           |         |         |
| EA                            |           |           |           |           |         |         | EA-1     |           |           |           |           |         |         |
| N                             | 1.198049  | -0.318741 | -0.115106 | 236.80    | 269.76  | 415.31  | N        | -1.222103 | -0.437582 | -0.000046 |           |         |         |
| H                             | 2.068818  | 0.196376  | -0.082812 | 794.50    | 857.16  | 916.34  | C        | -0.135888 | 0.500190  | -0.000062 | 214.74    | 313.00  | 415.76  |
| C                             | 0.049385  | 0.564553  | 0.054065  | 1006.99   | 1123.23 | 1151.62 | H        | -0.225119 | 1.169538  | 0.875373  | 723.81    | 912.93  | 1017.10 |
| H                             | 0.068131  | 1.131396  | 1.000578  | 1258.82   | 1322.02 | 1386.45 | H        | -0.225242 | 1.168983  | -0.875810 | 1031.17   | 1095.17 | 1244.65 |
| H                             | 0.072951  | 1.303292  | -0.756365 | 1422.19   | 1476.25 | 1484.38 | H        | -2.095396 | 0.096324  | 0.000604  | 1259.19   | 1381.44 | 1410.15 |
| H                             | 1.227359  | -1.009655 | 0.625985  | 1508.80   | 1655.23 | 2965.47 | C        | 1.211255  | -0.202135 | 0.000030  | 1430.29   | 1475.66 | 1485.88 |
| C                             | -1.238056 | -0.238462 | -0.027902 | 3035.53   | 3059.10 | 3112.37 | H        | 1.305732  | -0.841233 | -0.883008 | 2944.90   | 2972.02 | 3047.86 |
| H                             | -2.116266 | 0.407703  | 0.067523  | 3131.53   | 3538.96 | 3627.35 | H        | 2.035026  | 0.518509  | -0.002260 | 3131.31   | 3133.09 | 3453.77 |
| H                             | -1.293065 | -0.771301 | -0.982115 |           |         |         | H        | 1.307520  | -0.837373 | 0.885622  |           |         |         |
| H                             | -1.282249 | -0.983168 | 0.775969  |           |         |         |          |           |           |           |           |         |         |
| EA-2                          |           |           |           |           |         |         | EA-3     |           |           |           |           |         |         |
| N                             | 1.210490  | -0.230656 | 0.098359  | 176.42    | 326.01  | 390.74  | N        | 1.152178  | -0.319417 | -0.060020 | 233.24    | 262.98  | 420.30  |
| H                             | 1.181216  | -1.166620 | -0.280504 | 558.34    | 671.45  | 941.99  | H        | 2.001034  | 0.227191  | -0.128318 | 513.01    | 822.91  | 859.44  |
| C                             | 0.061229  | 0.524117  | -0.111813 | 990.43    | 1020.43 | 1201.67 | C        | -0.027425 | 0.537950  | -0.008957 | 962.22    | 1090.25 | 1139.07 |
| H                             | 0.140927  | 1.573931  | 0.148459  | 1292.64   | 1387.99 | 1448.93 | H        | -0.006387 | 1.175586  | -0.910911 | 1159.73   | 1314.48 | 1401.34 |
| H                             | 2.081462  | 0.229349  | -0.116969 | 1459.87   | 1483.60 | 1643.88 | H        | -0.037007 | 1.238015  | 0.846035  | 1455.96   | 1479.10 | 1652.72 |
| C                             | -1.242870 | -0.176159 | 0.015456  | 2964.45   | 3031.70 | 3124.53 | H        | 1.215334  | -0.885662 | 0.777501  | 2949.05   | 2969.35 | 3172.22 |
| H                             | -1.426665 | -0.544021 | 1.039719  | 3200.39   | 3571.72 | 3682.53 | C        | -1.267125 | -0.274791 | 0.003698  | 3284.10   | 3543.85 | 3633.32 |
| H                             | -2.070310 | 0.485896  | -0.253212 |           |         |         | H        | -1.266515 | -1.247671 | -0.473698 |           |         |         |
| H                             | -1.290215 | -1.051689 | -0.647861 |           |         |         | H        | -2.204404 | 0.149511  | 0.341086  |           |         |         |
| <b>R1 EA + H</b>              |           |           |           |           |         |         |          |           |           |           |           |         |         |
| TS1-1                         |           |           |           |           |         |         | TS1-2    |           |           |           |           |         |         |
| N                             | 1.143198  | 0.021695  | -0.363590 | -1529.95  |         |         | N        | 1.199074  | -0.407797 | 0.037824  | -1546.75  |         |         |
| H                             | 1.307411  | 1.128331  | 0.206777  | 166.64    | 242.11  | 359.35  | H        | 2.075597  | 0.038519  | -0.193962 | 214.59    | 265.68  | 292.07  |
| C                             | -0.042484 | -0.555903 | 0.251847  | 438.11    | 704.84  | 783.80  | C        | 0.057687  | 0.377849  | -0.296646 | 334.59    | 417.79  | 766.23  |
| H                             | 0.048922  | -0.654920 | 1.344715  | 907.57    | 1010.21 | 1024.81 | H        | 0.098413  | 0.674160  | -1.350809 | 853.57    | 933.16  | 1001.56 |
| H                             | -0.137423 | -1.579751 | -0.141801 | 1101.46   | 1151.09 | 1219.47 | H        | 0.044819  | 1.446367  | 0.296191  | 1135.57   | 1173.08 | 1254.98 |
| H                             | 1.970133  | -0.476776 | -0.027984 | 1280.59   | 1354.75 | 1384.85 | H        | 1.209361  | -0.682786 | 1.011689  | 1289.61   | 1336.06 | 1384.82 |
| H                             | 1.422169  | 1.771057  | 0.876012  | 1425.02   | 1465.47 | 1475.77 | H        | -0.007716 | 2.386525  | 0.893142  | 1397.99   | 1431.95 | 1473.18 |
| C                             | -1.270791 | 0.261590  | -0.105439 | 1488.95   | 1749.55 | 2993.08 | C        | -1.240922 | -0.305307 | 0.062885  | 1481.82   | 1654.90 | 3038.17 |
| H                             | -1.374900 | 0.335277  | -1.191981 | 3028.46   | 3044.16 | 3123.10 | H        | -1.273401 | -0.529216 | 1.135993  | 3080.97   | 3113.92 | 3135.80 |
| H                             | -2.179657 | -0.186959 | 0.306507  | 3136.69   | 3482.56 |         | H        | -2.096172 | 0.335006  | -0.171294 |           |         |         |
| H                             | -1.179385 | 1.277757  | 0.294436  |           |         |         | H        | -1.345010 | -1.249250 | -0.483152 |           |         |         |
| <b>TS1-3</b>                  |           |           |           |           |         |         |          |           |           |           |           |         |         |
| N                             | -1.210525 | 0.294206  | -0.227816 | -1183.38  |         |         |          |           |           |           |           |         |         |
| H                             | -2.118559 | -0.047896 | 0.059250  | 176.20    | 256.02  | 305.71  |          |           |           |           |           |         |         |
| C                             | -0.140180 | -0.573106 | 0.246668  | 430.11    | 560.27  | 818.99  |          |           |           |           |           |         |         |
| H                             | -0.302081 | -1.577006 | -0.172928 | 863.17    | 922.45  | 1021.07 |          |           |           |           |           |         |         |
| H                             | -0.116124 | -0.692975 | 1.343724  | 1125.40   | 1138.79 | 1186.40 |          |           |           |           |           |         |         |
| H                             | -1.099885 | 1.227529  | 0.153237  | 1227.53   | 1238.01 | 1320.09 |          |           |           |           |           |         |         |
| H                             | 1.265389  | 1.964114  | 0.846545  | 1402.43   | 1441.54 | 1491.08 |          |           |           |           |           |         |         |
| C                             | 1.184842  | -0.041613 | -0.221483 | 1544.45   | 1655.76 | 2969.59 |          |           |           |           |           |         |         |
| H                             | 1.221980  | 0.202173  | -1.284148 | 3024.67   | 3101.08 | 3193.70 |          |           |           |           |           |         |         |
| H                             | 1.291067  | 1.132177  | 0.362621  | 3539.25   | 3630.37 |         |          |           |           |           |           |         |         |
| H                             | 2.063911  | -0.579244 | 0.135305  |           |         |         |          |           |           |           |           |         |         |
| <b>R2 EA + CH<sub>3</sub></b> |           |           |           |           |         |         |          |           |           |           |           |         |         |
| TS2-1                         |           |           |           |           |         |         | TS2-2    |           |           |           |           |         |         |
| N                             | -0.057769 | 1.050290  | -0.442588 | -1946.34  |         |         | N        | 1.066260  | -1.204201 | 0.144392  | -1765.40  |         |         |
| H                             | -1.053732 | 0.314937  | -0.338162 | 74.71     | 112.55  | 155.72  | H        | 0.974765  | -1.209553 | 1.152705  | 31.38     | 92.87   | 129.39  |
| C                             | 0.949925  | 0.442639  | 0.413815  | 255.71    | 385.19  | 409.57  | C        | 0.457560  | -0.056790 | -0.449131 | 222.07    | 297.52  | 386.76  |
| H                             | 0.599838  | 0.297616  | 1.450233  | 557.14    | 574.32  | 774.21  | H        | 0.552069  | -0.098744 | -1.539933 | 483.60    | 500.37  | 539.91  |
| H                             | 1.799488  | 1.139932  | 0.472526  | 820.01    | 912.72  | 1026.65 | H        | -0.793783 | -0.036613 | -0.255020 | 783.67    | 878.04  | 932.48  |
| H                             | -0.401482 | 1.902217  | 0.003257  | 1094.98   | 1114.16 | 1141.63 | H        | 0.713961  | -2.076876 | -0.224705 | 1002.60   | 1092.62 | 1146.20 |







|                  |           |           |           |          |         |         |  |         |         |         |
|------------------|-----------|-----------|-----------|----------|---------|---------|--|---------|---------|---------|
| N                | -0.425534 | 1.215566  | -0.295042 |          |         |         |  |         |         |         |
| H                | -1.020658 | 1.326849  | -1.108395 | 98.47    | 104.82  | 116.97  |  |         |         |         |
| C                | -0.914200 | 0.123214  | 0.549766  | 169.74   | 237.65  | 278.70  |  |         |         |         |
| H                | -1.900275 | 0.334695  | 0.993258  | 330.53   | 395.83  | 452.29  |  |         |         |         |
| H                | -0.204475 | -0.002040 | 1.376821  | 800.12   | 882.26  | 917.36  |  |         |         |         |
| H                | -0.433720 | 2.096816  | 0.204460  | 1007.32  | 1115.73 | 1163.80 |  |         |         |         |
| N                | 2.302063  | -0.276195 | 0.114725  | 1256.57  | 1321.17 | 1390.39 |  |         |         |         |
| H                | 3.162823  | -0.071964 | -0.402234 | 1425.87  | 1478.11 | 1480.17 |  |         |         |         |
| H                | 1.602579  | 0.380328  | -0.262882 | 1508.01  | 1549.14 | 1647.03 |  |         |         |         |
| C                | -0.977733 | -1.163712 | -0.254152 | 2996.80  | 3037.48 | 3074.83 |  |         |         |         |
| H                | 0.016033  | -1.426682 | -0.630909 | 3117.11  | 3136.43 | 3356.49 |  |         |         |         |
| H                | -1.341602 | -1.992041 | 0.360796  | 3483.98  | 3528.76 | 3614.36 |  |         |         |         |
| H                | -1.656038 | -1.056487 | -1.109658 |          |         |         |  |         |         |         |
| TSS-1            |           |           |           | PCS-1    |         |         |  |         |         |         |
| N                | -0.173981 | 0.995652  | -0.412578 | -2012.13 |         |         |  |         |         |         |
| H                | -1.039246 | 0.165889  | -0.471648 | 91.23    | 122.80  | 155.32  |  | 38.67   | 92.27   | 126.84  |
| C                | 0.903951  | 0.475254  | 0.410336  | 252.83   | 409.18  | 444.46  |  | 136.64  | 181.67  | 247.87  |
| H                | 0.598684  | 0.317435  | 1.459293  | 633.82   | 716.75  | 792.83  |  | 293.59  | 357.92  | 427.21  |
| H                | 1.698686  | 1.236403  | 0.440205  | 831.10   | 915.31  | 1027.88 |  | 727.25  | 913.06  | 1023.73 |
| H                | -0.578764 | 1.821768  | 0.025284  | 1102.01  | 1121.22 | 1241.36 |  | 1033.13 | 1068.74 | 1097.44 |
| N                | -1.966872 | -0.598757 | -0.000185 | 1280.54  | 1375.52 | 1401.73 |  | 1248.12 | 1260.42 | 1384.72 |
| H                | -2.766489 | 0.024598  | 0.122732  | 1435.29  | 1469.25 | 1475.70 |  | 1413.68 | 1430.83 | 1477.66 |
| H                | -1.663936 | -0.835575 | 0.946192  | 1491.88  | 1552.79 | 1609.68 |  | 1493.79 | 1659.72 | 1684.19 |
| C                | 1.436149  | -0.819539 | -0.180954 | 2965.66  | 3016.94 | 3043.31 |  | 2949.57 | 2978.13 | 3042.26 |
| H                | 1.793526  | -0.650111 | -1.201059 | 3123.95  | 3132.89 | 3462.48 |  | 3124.39 | 3132.40 | 3458.78 |
| H                | 2.259778  | -1.218891 | 0.418349  | 3513.78  | 3558.47 |         |  | 3488.90 | 3618.56 | 3653.18 |
| H                | 0.643139  | -1.574071 | -0.226303 |          |         |         |  |         |         |         |
| TSS-2            |           |           |           | PCS-2    |         |         |  |         |         |         |
| N                | -1.074518 | -1.182546 | -0.157742 | -1028.89 |         |         |  |         |         |         |
| H                | -0.981365 | -1.183501 | -1.166126 | 86.68    | 99.60   | 131.14  |  | 88.41   | 119.27  | 156.04  |
| C                | -0.418415 | -0.065200 | 0.439561  | 231.80   | 306.15  | 407.83  |  | 157.96  | 177.04  | 212.82  |
| H                | -0.503627 | -0.120198 | 1.531054  | 567.07   | 601.85  | 803.65  |  | 310.57  | 405.33  | 416.01  |
| H                | 0.773086  | -0.107419 | 0.205451  | 810.27   | 916.64  | 971.55  |  | 630.70  | 749.95  | 939.51  |
| H                | -0.748526 | -2.069719 | 0.200874  | 1009.71  | 1157.90 | 1213.18 |  | 1000.41 | 1034.15 | 1067.45 |
| N                | 2.184126  | -0.113513 | -0.181487 | 1266.51  | 1332.52 | 1385.81 |  | 1203.46 | 1307.91 | 1384.93 |
| H                | 2.277789  | 0.887956  | -0.373094 | 1422.18  | 1458.44 | 1473.34 |  | 1448.41 | 1463.01 | 1488.80 |
| H                | 2.580555  | -0.228946 | 0.755331  | 1481.08  | 1544.61 | 1657.04 |  | 1654.10 | 1660.51 | 1666.18 |
| C                | -0.918859 | 1.252977  | -0.108633 | 3031.87  | 3068.06 | 3107.56 |  | 2966.52 | 3051.24 | 3120.12 |
| H                | -0.397699 | 2.094940  | 0.356677  | 3127.87  | 3431.77 | 3529.00 |  | 3186.18 | 3491.22 | 3535.07 |
| H                | -0.749659 | 1.308077  | -1.190954 | 3555.18  | 3650.06 |         |  | 3618.60 | 3650.73 | 3669.67 |
| H                | -1.994167 | 1.364570  | 0.069821  |          |         |         |  |         |         |         |
| TSS-3            |           |           |           | PCS-3    |         |         |  |         |         |         |
| N                | 1.166446  | -0.974406 | -0.275406 | -1716.20 |         |         |  |         |         |         |
| H                | 1.923112  | -1.531209 | 0.100010  | 100.59   | 130.55  | 161.60  |  | 45.29   | 71.44   | 106.23  |
| C                | 1.107045  | 0.335543  | 0.358104  | 334.77   | 390.43  | 427.41  |  | 135.03  | 161.89  | 213.58  |
| H                | 0.951343  | 0.294408  | 1.450264  | 548.53   | 713.57  | 809.01  |  | 242.90  | 378.85  | 426.32  |
| H                | 2.068254  | 0.846105  | 0.196990  | 871.44   | 899.31  | 926.29  |  | 525.33  | 851.80  | 888.95  |
| H                | 0.296592  | -1.469485 | -0.102746 | 1074.81  | 1132.01 | 1152.12 |  | 960.90  | 1049.69 | 1097.31 |
| N                | -1.980006 | -0.499081 | 0.136727  | 1229.07  | 1317.60 | 1334.54 |  | 1144.06 | 1162.13 | 1334.50 |
| H                | -2.458830 | -0.433015 | -0.764157 | 1402.27  | 1434.02 | 1441.78 |  | 1398.89 | 1450.03 | 1466.49 |
| H                | -2.553586 | 0.047107  | 0.782972  | 1488.89  | 1546.57 | 1657.74 |  | 1651.52 | 1661.29 | 1668.81 |
| C                | -0.002075 | 1.139701  | -0.269266 | 2966.37  | 3023.38 | 3092.43 |  | 2931.78 | 2962.29 | 3158.40 |
| H                | -0.221944 | 2.092519  | 0.215442  | 3179.93  | 3449.47 | 3531.27 |  | 3269.58 | 3500.62 | 3513.14 |
| H                | 0.078499  | 1.222541  | -1.355157 | 3548.26  | 3625.99 |         |  | 3619.65 | 3627.50 | 3652.79 |
| H                | -1.018345 | 0.393974  | -0.085893 |          |         |         |  |         |         |         |
| <b>R6 EA + O</b> |           |           |           |          |         |         |  |         |         |         |
| RC6              |           |           |           |          |         |         |  |         |         |         |
| N                | 0.313655  | 0.958754  | 0.296186  | 63.22    | 139.95  | 184.30  |  |         |         |         |
| H                | 0.704522  | 1.806231  | -0.091965 | 259.61   | 297.26  | 422.81  |  |         |         |         |
| C                | -0.830119 | 0.452350  | -0.447729 | 759.42   | 818.48  | 917.40  |  |         |         |         |

|                                           |           |           |           |                 |         |         |   |           |           |           |          |         |         |
|-------------------------------------------|-----------|-----------|-----------|-----------------|---------|---------|---|-----------|-----------|-----------|----------|---------|---------|
| H                                         | -0.492652 | 0.240321  | -1.469260 | 995.39          | 1123.97 | 1146.99 |   |           |           |           |          |         |         |
| H                                         | -1.648379 | 1.187587  | -0.522409 | 1252.85         | 1312.71 | 1390.43 |   |           |           |           |          |         |         |
| H                                         | 0.106365  | 1.105313  | 1.275971  | 1419.36         | 1479.61 | 1490.02 |   |           |           |           |          |         |         |
| O                                         | 1.973737  | -0.707652 | -0.103270 | 1511.52         | 1641.43 | 2979.65 |   |           |           |           |          |         |         |
| C                                         | -1.340134 | -0.824734 | 0.196492  | 3037.90         | 3068.83 | 3116.88 |   |           |           |           |          |         |         |
| H                                         | -1.680257 | -0.634655 | 1.221705  | 3140.59         | 3557.34 | 3655.18 |   |           |           |           |          |         |         |
| H                                         | -2.183821 | -1.238100 | -0.363865 |                 |         |         |   |           |           |           |          |         |         |
| H                                         | -0.538878 | -1.568962 | 0.232407  |                 |         |         |   |           |           |           |          |         |         |
| TS6-1                                     |           |           |           | PC6-1           |         |         |   |           |           |           |          |         |         |
| N                                         | -0.300487 | 0.983658  | -0.395631 | -1846.41        |         |         | N | -0.137769 | -1.145830 | -0.004511 |          |         |         |
| H                                         | -1.167687 | 0.147984  | -0.422864 | 94.85           | 145.42  | 251.22  | H | 1.631532  | -0.304453 | -0.002521 | 64.10    | 64.31   | 200.91  |
| C                                         | 0.840072  | 0.511316  | 0.359269  | 401.27          | 481.31  | 685.04  | C | -1.305262 | -0.313392 | 0.004509  | 232.30   | 357.15  | 425.16  |
| H                                         | 0.613351  | 0.459581  | 1.435708  | 781.66          | 913.56  | 1027.54 | H | -1.920885 | -0.565481 | 0.886934  | 516.87   | 629.40  | 724.95  |
| H                                         | 1.634595  | 1.266995  | 0.249511  | 1087.65         | 1105.37 | 1237.33 | H | -1.939326 | -0.569508 | -0.863455 | 915.86   | 1022.49 | 1039.87 |
| H                                         | -0.693281 | 1.815500  | 0.046017  | 1278.71         | 1330.30 | 1388.61 | H | -0.421853 | -2.127308 | -0.003618 | 1099.67  | 1250.45 | 1258.92 |
| O                                         | -1.923651 | -0.632657 | 0.137661  | 1422.39         | 1450.64 | 1477.35 | O | 2.451933  | 0.237289  | 0.001841  | 1383.70  | 1413.25 | 1431.69 |
| C                                         | 1.303179  | -0.838855 | -0.156074 | 1484.50         | 1614.85 | 2990.84 | C | -0.940943 | 1.160976  | -0.002366 | 1476.50  | 1481.66 | 2956.04 |
| H                                         | 1.540237  | -0.782565 | -1.222668 | 3024.46         | 3044.39 | 3124.30 | H | -0.353322 | 1.406214  | -0.892317 | 2983.43  | 3049.68 | 3132.43 |
| H                                         | 2.191680  | -1.179590 | 0.382664  | 3139.77 3504.17 |         |         | H | -1.837314 | 1.787936  | 0.006381  | 3136.25  | 3481.68 | 3574.01 |
| H                                         | 0.514220  | -1.587015 | -0.019412 |                 |         |         | H | -0.332685 | 1.409592  | 0.872588  |          |         |         |
| TS6-2                                     |           |           |           | PC6-2           |         |         |   |           |           |           |          |         |         |
| N                                         | -0.912367 | -1.223720 | -0.148696 | -334.02         |         |         | N | 0.140121  | 1.256618  | -0.273390 |          |         |         |
| H                                         | -0.563845 | -2.089503 | 0.237629  | 63.21           | 103.42  | 236.08  | H | -0.378452 | 1.981727  | 0.196536  | 62.51    | 93.66   | 166.97  |
| C                                         | -0.345126 | -0.056987 | 0.443150  | 329.48          | 426.39  | 737.43  | C | 0.682614  | 0.255304  | 0.517368  | 221.58   | 374.12  | 386.59  |
| H                                         | -0.466794 | -0.100551 | 1.532169  | 789.22          | 925.12  | 997.93  | H | 1.056574  | 0.580289  | 1.483230  | 438.24   | 471.39  | 629.05  |
| H                                         | 0.804980  | -0.006000 | 0.287421  | 1119.18         | 1146.81 | 1248.31 | H | -1.308707 | -0.634825 | 0.581146  | 663.42   | 944.70  | 990.67  |
| H                                         | -0.827697 | -1.236945 | -1.156650 | 1284.69         | 1383.05 | 1394.79 | H | -0.302087 | 0.953601  | -1.130024 | 1028.61  | 1200.52 | 1295.76 |
| O                                         | 2.281461  | 0.053381  | -0.100988 | 1424.78         | 1474.28 | 1480.09 | O | -2.091723 | -0.550730 | -0.002593 | 1388.40  | 1447.71 | 1463.92 |
| C                                         | -0.922269 | 1.216500  | -0.139305 | 1653.49         | 1739.93 | 3039.10 | C | 1.341122  | -0.876856 | -0.190946 | 1483.93  | 1648.92 | 2977.26 |
| H                                         | -0.455081 | 2.097649  | 0.308767  | 3067.34         | 3118.19 | 3134.45 | H | 1.638615  | -1.659852 | 0.511485  | 3045.60  | 3125.46 | 3191.01 |
| H                                         | -0.750200 | 1.257551  | -1.220875 | 3565.95 3664.40 |         |         | H | 0.661499  | -1.326252 | -0.928498 | 3580.68  | 3609.86 | 3693.37 |
| H                                         | -2.002110 | 1.259721  | 0.037248  |                 |         |         | H | 2.243068  | -0.555868 | -0.737933 |          |         |         |
| TS6-3                                     |           |           |           |                 |         |         |   |           |           |           |          |         |         |
| N                                         | 1.173968  | -0.899720 | -0.291322 | -1593.91        |         |         | N | 0.828995  | -1.115541 | -0.338614 |          |         |         |
| H                                         | 0.359558  | -1.491763 | -0.166526 | 109.00          | 142.95  | 300.26  | H | -0.150607 | -1.378067 | -0.348918 | 55.19    | 107.56  | 153.65  |
| C                                         | 0.967102  | 0.375642  | 0.375691  | 412.00          | 444.90  | 575.07  | C | 1.016913  | 0.098730  | 0.442787  | 240.72   | 296.56  | 350.75  |
| H                                         | 0.787221  | 0.294650  | 1.461341  | 804.34          | 856.59  | 915.10  | H | 0.581658  | 0.053148  | 1.458588  | 397.21   | 427.99  | 595.12  |
| H                                         | 1.878836  | 0.981763  | 0.256574  | 987.28          | 1119.98 | 1129.64 | H | 2.102020  | 0.234356  | 0.597962  | 842.79   | 861.73  | 953.77  |
| H                                         | 1.975801  | -1.388394 | 0.084886  | 1170.20         | 1195.29 | 1250.01 | H | 1.349761  | -1.887172 | 0.057085  | 1095.98  | 1140.82 | 1156.22 |
| O                                         | -2.018741 | -0.564395 | 0.122879  | 1327.41         | 1401.26 | 1441.21 | O | -2.235051 | -0.194271 | 0.099310  | 1325.67  | 1396.20 | 1449.24 |
| C                                         | -0.175692 | 1.106423  | -0.266287 | 1480.44         | 1655.91 | 2973.07 | C | 0.481490  | 1.284328  | -0.273700 | 1464.65  | 1661.95 | 2942.04 |
| H                                         | -1.206152 | 0.327549  | -0.094239 | 3017.71         | 3095.79 | 3190.99 | H | -1.613647 | 0.539303  | -0.092363 | 2971.96  | 3154.02 | 3265.73 |
| H                                         | -0.487774 | 2.035096  | 0.213095  | 3540.57 3633.50 |         |         | H | 0.346728  | 2.225895  | 0.247741  | 3544.42  | 3615.70 | 3635.01 |
| H                                         | -0.123795 | 1.161908  | -1.355338 |                 |         |         | H | 0.471113  | 1.277137  | -1.358808 |          |         |         |
| <b>R7 EA + C<sub>2</sub>H<sub>5</sub></b> |           |           |           |                 |         |         |   |           |           |           |          |         |         |
| TS7-1                                     |           |           |           | TS7-2           |         |         |   |           |           |           |          |         |         |
| N                                         | 0.715507  | 1.276413  | -0.080272 | -1939.05        |         |         | N | 1.481133  | -1.108549 | -0.440423 | -1823.74 |         |         |
| H                                         | -0.419514 | 0.852729  | -0.473424 | 86.45           | 120.23  | 152.40  | H | 1.050308  | -0.985117 | -1.348624 | 41.49    | 98.33   | 128.72  |
| C                                         | 1.331339  | 0.133777  | 0.573885  | 196.75          | 226.47  | 281.84  | C | 1.063997  | -0.114046 | 0.496101  | 174.89   | 221.79  | 270.80  |
| H                                         | 0.713470  | -0.282040 | 1.388733  | 408.24          | 457.65  | 565.32  | H | 1.543285  | -0.277072 | 1.467648  | 316.77   | 401.55  | 507.16  |
| H                                         | 2.262906  | 0.481407  | 1.047687  | 758.95          | 799.75  | 859.63  | H | -0.199831 | -0.216512 | 0.749714  | 530.49   | 775.44  | 824.94  |
| H                                         | 0.424618  | 1.948976  | 0.631186  | 875.81          | 914.70  | 1026.19 | H | 1.316450  | -2.053070 | -0.119638 | 834.52   | 906.31  | 939.12  |
| C                                         | -1.626097 | 0.326470  | -0.629394 | 1041.81         | 1098.22 | 1113.96 | C | -1.634922 | -0.316799 | 0.729475  | 1000.90  | 1056.94 | 1133.84 |
| C                                         | -1.908303 | -0.629019 | 0.499380  | 1147.68         | 1218.03 | 1237.01 | C | -2.001655 | 0.210838  | -0.630528 | 1145.46  | 1173.03 | 1213.31 |
| H                                         | -2.268923 | 1.208990  | -0.655629 | 1277.52         | 1374.33 | 1381.91 | H | -1.794328 | -1.385478 | 0.880724  | 1259.98  | 1364.90 | 1389.59 |
| H                                         | -1.543781 | -0.134812 | -1.616167 | 1393.76         | 1417.86 | 1454.32 | H | -1.967515 | 0.278902  | 1.579700  | 1394.27  | 1448.54 | 1452.06 |
| H                                         | -1.191507 | -1.458084 | 0.516244  | 1465.46         | 1470.11 | 1473.87 | H | -1.796249 | 1.283921  | -0.711310 | 1456.91  | 1467.55 | 1470.68 |
| H                                         | -1.862527 | -0.127144 | 1.472661  | 1482.06         | 1489.56 | 1500.28 | H | -1.429726 | -0.295093 | -1.420113 | 1480.11  | 1485.57 | 1650.10 |
| H                                         | -2.909847 | -1.071465 | 0.410788  | 2970.07         | 3012.39 | 3017.22 | H | -3.064857 | 0.064940  | -0.868286 | 3005.33  | 3019.99 | 3060.37 |
| C                                         | 1.642758  | -0.947462 | -0.447282 | 3039.19         | 3076.64 | 3086.82 | C | 1.253253  | 1.286538  | -0.029933 | 3068.67  | 3090.85 | 3095.04 |
| H                                         | 2.286490  | -0.547334 | -1.236429 | 3104.08         | 3116.13 | 3130.56 | H | 0.711719  | 1.415729  | -0.976179 | 3101.77  | 3120.23 | 3181.97 |

|                             |           |           |           |                 |         |         |   |           |           |           |                 |         |         |
|-----------------------------|-----------|-----------|-----------|-----------------|---------|---------|---|-----------|-----------|-----------|-----------------|---------|---------|
| H                           | 2.142094  | -1.803863 | 0.016379  | 3163.47 3478.10 |         |         | H | 0.866989  | 2.026149  | 0.678371  | 3548.70 3646.79 |         |         |
| H                           | 0.719796  | -1.304852 | -0.919657 |                 |         |         | H | 2.311788  | 1.503350  | -0.219727 |                 |         |         |
| TS7-3                       |           |           |           |                 |         |         |   |           |           |           |                 |         |         |
| N                           | -1.372288 | -1.000965 | 0.524340  | -1651.09        |         |         |   |           |           |           |                 |         |         |
| H                           | -1.835729 | -1.858033 | 0.249274  | 67.36           | 115.08  | 137.96  |   |           |           |           |                 |         |         |
| C                           | -1.412116 | -0.009301 | -0.547444 | 186.08          | 222.63  | 256.17  |   |           |           |           |                 |         |         |
| H                           | -2.434058 | 0.175593  | -0.929205 | 407.46          | 416.57  | 508.60  |   |           |           |           |                 |         |         |
| H                           | -0.833445 | -0.403080 | -1.394531 | 663.45          | 806.02  | 835.11  |   |           |           |           |                 |         |         |
| H                           | -1.850402 | -0.650991 | 1.346856  | 860.70          | 915.06  | 928.05  |   |           |           |           |                 |         |         |
| C                           | 1.664267  | 0.432880  | 0.572418  | 1020.75         | 1055.03 | 1112.30 |   |           |           |           |                 |         |         |
| C                           | 1.913006  | -0.630665 | -0.464612 | 1139.51         | 1175.25 | 1219.78 |   |           |           |           |                 |         |         |
| H                           | 2.330774  | 1.297086  | 0.527454  | 1253.58         | 1293.78 | 1384.46 |   |           |           |           |                 |         |         |
| H                           | 1.544987  | 0.058619  | 1.590317  | 1389.47         | 1404.69 | 1417.33 |   |           |           |           |                 |         |         |
| H                           | 1.161381  | -1.423208 | -0.382984 | 1446.75         | 1450.09 | 1474.58 |   |           |           |           |                 |         |         |
| H                           | 1.871521  | -0.217695 | -1.479680 | 1483.86         | 1501.81 | 1650.64 |   |           |           |           |                 |         |         |
| H                           | 2.901569  | -1.094481 | -0.345954 | 2935.37         | 3015.00 | 3039.60 |   |           |           |           |                 |         |         |
| C                           | -0.798070 | 1.281731  | -0.081191 | 3075.82         | 3082.12 | 3086.66 |   |           |           |           |                 |         |         |
| H                           | 0.463700  | 0.941943  | 0.298465  | 3109.36         | 3170.30 | 3171.49 |   |           |           |           |                 |         |         |
| H                           | -0.674055 | 2.040517  | -0.854760 | 3538.35 3625.66 |         |         |   |           |           |           |                 |         |         |
| H                           | -1.242748 | 1.692614  | 0.829343  |                 |         |         |   |           |           |           |                 |         |         |
| R8 EA + O <sub>2</sub>      |           |           |           |                 |         |         |   |           |           |           |                 |         |         |
| TS8-1                       |           |           |           |                 |         | PC8-1   |   |           |           |           |                 |         |         |
| N                           | 0.465254  | 1.244342  | -0.214282 | -1991.77        |         |         | N | -0.675133 | -1.183346 | 0.002943  |                 |         |         |
| H                           | -0.761421 | 0.702678  | -0.512078 | 94.37           | 98.22   | 152.67  | H | 0.997154  | -0.697321 | -0.421516 | 51.35           | 61.26   | 95.31   |
| C                           | 1.171688  | 0.242955  | 0.523374  | 233.86          | 296.95  | 422.17  | C | -1.727136 | -0.228051 | 0.189026  | 134.24          | 246.50  | 266.48  |
| H                           | 0.474935  | -0.144155 | 1.301818  | 530.82          | 665.61  | 729.31  | H | -2.034358 | -0.250790 | 1.250415  | 402.32          | 430.77  | 715.43  |
| H                           | 2.018053  | 0.685605  | 1.070614  | 916.78          | 1007.94 | 1045.93 | H | -2.620531 | -0.557602 | -0.370704 | 729.36          | 915.57  | 1028.59 |
| H                           | 0.359157  | 2.084589  | 0.356304  | 1115.33         | 1167.80 | 1258.57 | H | -1.003785 | -2.114867 | 0.261977  | 1042.53         | 1103.58 | 1256.15 |
| O                           | -1.727162 | 0.156623  | -0.457442 | 1294.35         | 1366.04 | 1392.63 | O | 1.900549  | -0.291407 | -0.486068 | 1260.41         | 1290.53 | 1384.06 |
| O                           | -1.661971 | -0.710479 | 0.472903  | 1400.12         | 1421.46 | 1477.27 | O | 1.986387  | 0.503853  | 0.541148  | 1410.97         | 1429.51 | 1476.58 |
| C                           | 1.602605  | -0.909947 | -0.367074 | 1483.10         | 1645.93 | 2873.13 | C | -1.298188 | 1.168783  | -0.221873 | 1490.59         | 1594.70 | 2960.23 |
| H                           | 2.289188  | -0.562305 | -1.144456 | 3017.79         | 3048.83 | 3131.88 | H | -1.030520 | 1.190367  | -1.283089 | 2988.88         | 3049.86 | 3132.36 |
| H                           | 2.101464  | -1.687018 | 0.218876  | 3138.53 3492.19 |         |         | H | -2.103593 | 1.890025  | -0.056459 | 3141.11         | 3293.48 | 3490.73 |
| H                           | 0.729154  | -1.356986 | -0.852588 |                 |         |         | H | -0.421983 | 1.479642  | 0.355216  |                 |         |         |
| TS8-2                       |           |           |           |                 |         | PC8-2   |   |           |           |           |                 |         |         |
| N                           | 0.879135  | 1.310819  | -0.147099 | -1900.06        |         |         | N | 0.993152  | 1.273852  | -0.214521 |                 |         |         |
| H                           | 0.377950  | 1.278081  | -1.026259 | 76.98           | 147.42  | 156.96  | H | 0.375497  | 1.211475  | -1.013003 | 85.45           | 101.06  | 134.87  |
| C                           | 0.953126  | 0.095933  | 0.521835  | 210.73          | 337.49  | 401.98  | C | 1.156034  | 0.106353  | 0.507055  | 167.99          | 219.80  | 231.41  |
| H                           | 1.416585  | 0.176453  | 1.507355  | 425.14          | 574.07  | 699.31  | H | 1.697505  | 0.217581  | 1.443131  | 393.62          | 418.88  | 634.50  |
| H                           | -0.415963 | -0.245361 | 0.772009  | 856.42          | 941.17  | 993.89  | H | -0.742455 | -0.168004 | 0.858988  | 656.85          | 723.59  | 943.67  |
| H                           | 0.622142  | 2.113113  | 0.407950  | 1109.56         | 1151.76 | 1200.09 | H | 0.875123  | 2.126107  | 0.309711  | 991.52          | 1038.13 | 1201.91 |
| O                           | -1.556751 | -0.407749 | 0.567270  | 1293.43         | 1372.89 | 1388.50 | O | -1.711731 | -0.241148 | 0.632571  | 1289.68         | 1305.50 | 1387.50 |
| O                           | -1.766766 | 0.088709  | -0.583353 | 1437.61         | 1468.84 | 1479.70 | O | -1.801821 | 0.044256  | -0.630279 | 1447.79         | 1465.37 | 1484.63 |
| C                           | 1.377753  | -1.069320 | -0.328921 | 1575.47         | 1657.26 | 3020.96 | C | 1.320637  | -1.152236 | -0.279857 | 1550.20         | 1653.03 | 2987.26 |
| H                           | 1.323758  | -2.004371 | 0.234343  | 3088.65         | 3121.55 | 3136.33 | H | 1.298468  | -2.029159 | 0.372628  | 3063.24         | 3124.58 | 3133.89 |
| H                           | 0.718893  | -1.160623 | -1.201587 | 3568.10 3680.01 |         |         | H | 0.517577  | -1.259103 | -1.020819 | 3172.55         | 3577.59 | 3693.52 |
| H                           | 2.405546  | -0.940377 | -0.692933 |                 |         |         | H | 2.274607  | -1.165433 | -0.830513 |                 |         |         |
| TS8-3                       |           |           |           |                 |         | PC8-3   |   |           |           |           |                 |         |         |
| N                           | -1.408420 | -0.970539 | -0.464899 | -1662.32        |         |         | N | -1.420470 | -1.047241 | -0.385698 |                 |         |         |
| H                           | -0.507510 | -1.415782 | -0.600651 | 43.89           | 119.74  | 143.23  | H | -0.476588 | -1.395150 | -0.514274 | 41.06           | 76.99   | 101.71  |
| C                           | -1.285157 | 0.116544  | 0.495258  | 243.15          | 293.30  | 423.77  | C | -1.400692 | 0.119601  | 0.482973  | 131.56          | 177.97  | 276.11  |
| H                           | -2.299101 | 0.412713  | 0.814323  | 455.12          | 547.97  | 790.85  | H | -2.437422 | 0.325986  | 0.803061  | 299.28          | 426.27  | 472.36  |
| H                           | -0.747321 | -0.161213 | 1.419278  | 871.80          | 910.65  | 979.26  | H | -0.830705 | -0.026051 | 1.419891  | 638.48          | 848.87  | 868.60  |
| H                           | -2.043912 | -1.681193 | -0.126047 | 1037.31         | 1119.31 | 1139.18 | H | -1.967067 | -1.793756 | 0.023264  | 950.48          | 1090.13 | 1143.91 |
| O                           | 1.664354  | -0.768614 | 0.332577  | 1200.90         | 1329.53 | 1390.56 | O | 1.733984  | -0.808472 | 0.126296  | 1161.15         | 1283.45 | 1328.46 |
| O                           | 1.775536  | 0.343102  | -0.273090 | 1418.17         | 1440.77 | 1455.77 | O | 2.003775  | 0.450694  | -0.041302 | 1395.67         | 1446.32 | 1457.56 |
| C                           | -0.632196 | 1.305845  | -0.126472 | 1529.97         | 1663.10 | 2962.90 | C | -0.883061 | 1.313266  | -0.233135 | 1515.66         | 1661.71 | 2942.34 |
| H                           | -0.464925 | 2.179128  | 0.502928  | 2995.81         | 3107.38 | 3212.80 | H | -0.699394 | 2.234795  | 0.311630  | 2973.82         | 3147.92 | 3258.95 |
| H                           | 0.783466  | 0.827274  | -0.274271 | 3547.25 3631.76 |         |         | H | 1.139218  | 0.893683  | -0.209319 | 3412.74         | 3544.70 | 3633.09 |
| H                           | -0.876757 | 1.502607  | -1.169880 |                 |         |         | H | -0.984310 | 1.356203  | -1.313342 |                 |         |         |
| R9 EA + Cl (M05-2X/ma-TZVP) |           |           |           |                 |         |         |   |           |           |           |                 |         |         |

| RC9   |           |           |           |         |         |         |       |           |           |           |         |         |         |
|-------|-----------|-----------|-----------|---------|---------|---------|-------|-----------|-----------|-----------|---------|---------|---------|
| N     | 0.206868  | -0.697881 | 0.000076  |         |         |         |       |           |           |           |         |         |         |
| H     | 0.207132  | -1.256936 | -0.837389 | 73.31   | 114.18  | 256.82  |       |           |           |           |         |         |         |
| C     | 1.089479  | 0.454591  | 0.000163  | 275.23  | 434.28  | 465.48  |       |           |           |           |         |         |         |
| H     | 0.838092  | 1.049280  | -0.873898 | 736.16  | 791.28  | 915.84  |       |           |           |           |         |         |         |
| H     | 0.838316  | 1.048962  | 0.874503  | 980.31  | 1084.15 | 1148.83 |       |           |           |           |         |         |         |
| H     | 0.206978  | -1.256949 | 0.837529  | 1259.99 | 1383.25 | 1395.04 |       |           |           |           |         |         |         |
| C     | 2.564692  | 0.076115  | -0.000104 | 1428.37 | 1511.00 | 1512.84 |       |           |           |           |         |         |         |
| H     | 2.814792  | -0.508967 | -0.883174 | 1531.44 | 1648.31 | 3094.02 |       |           |           |           |         |         |         |
| H     | 3.181031  | 0.972762  | -0.000038 | 3135.64 | 3154.89 | 3168.01 |       |           |           |           |         |         |         |
| H     | 2.815042  | -0.509284 | 0.882683  | 3185.32 | 3591.85 | 3695.69 |       |           |           |           |         |         |         |
| Cl    | -2.005185 | 0.109395  | 0.000176  |         |         |         |       |           |           |           |         |         |         |
| TS9-1 |           |           |           |         |         |         | PC9-1 |           |           |           |         |         |         |
| N     | 0.473313  | 1.113225  | -0.276228 |         |         |         | N     | 0.602910  | 1.064190  | -0.291808 |         |         |         |
| H     | -0.758231 | 0.720734  | -0.061896 |         |         |         | H     | -0.984658 | 0.512764  | -0.179405 | 23.98   | 62.16   | 141.79  |
| C     | 1.456839  | 0.385551  | 0.472369  |         |         |         | C     | 1.485566  | 0.313106  | 0.549787  | 243.91  | 274.13  | 385.88  |
| H     | 1.064661  | 0.220362  | 1.472156  |         |         |         | H     | 0.920906  | -0.053083 | 1.403996  | 719.40  | 723.52  | 827.37  |
| H     | 2.345252  | 1.021157  | 0.548280  |         |         |         | H     | 2.301049  | 0.947603  | 0.907249  | 924.35  | 1017.78 | 1054.84 |
| H     | 0.733751  | 1.188670  | -1.256785 |         |         |         | H     | 1.132503  | 1.519438  | -1.032144 | 1127.09 | 1257.40 | 1316.59 |
| C     | 1.830705  | -0.939169 | -0.194104 |         |         |         | C     | 2.070040  | -0.870227 | -0.234292 | 1393.58 | 1416.39 | 1507.15 |
| H     | 2.248406  | -0.768679 | -1.184816 |         |         |         | H     | 2.663907  | -0.522166 | -1.076841 | 1515.92 | 1533.47 | 2112.80 |
| H     | 2.572744  | -1.455765 | 0.409321  |         |         |         | H     | 2.707011  | -1.458902 | 0.420907  | 3065.06 | 3102.46 | 3148.16 |
| H     | 0.946996  | -1.564663 | -0.284882 |         |         |         | H     | 1.268205  | -1.502878 | -0.605113 | 3176.77 | 3185.94 | 3494.30 |
| Cl    | -1.893649 | -0.225452 | 0.036625  |         |         |         | Cl    | -2.091937 | -0.208787 | 0.018297  |         |         |         |
| TS9-2 |           |           |           |         |         |         | PC9-2 |           |           |           |         |         |         |
| N     | -0.710110 | 1.250509  | -0.257537 |         |         |         | N     | 1.469942  | -1.209279 | -0.193418 |         |         |         |
| H     | -0.184023 | 1.976106  | 0.202605  |         |         |         | H     | 1.205333  | -2.085748 | 0.221149  | 57.84   | 97.14   | 146.70  |
| C     | -1.089590 | 0.146333  | 0.549239  |         |         |         | C     | 1.111131  | -0.065881 | 0.491237  | 217.62  | 384.21  | 416.00  |
| H     | -1.610044 | 0.509087  | 1.434513  |         |         |         | H     | 1.182214  | -0.143450 | 1.566967  | 644.23  | 669.03  | 714.77  |
| H     | -0.155937 | -0.363942 | 0.911735  |         |         |         | H     | -0.636707 | -0.011696 | 0.315195  | 816.16  | 954.86  | 1005.37 |
| H     | -0.315189 | 1.009466  | -1.154452 |         |         |         | H     | 1.324520  | -1.188611 | -1.189388 | 1061.40 | 1216.51 | 1312.00 |
| Cl    | 1.854032  | -0.247272 | -0.014009 |         |         |         | Cl    | -1.941771 | 0.006463  | -0.032719 | 1415.57 | 1469.94 | 1496.98 |
| C     | -1.905921 | -0.865686 | -0.229415 |         |         |         | C     | 1.416450  | 1.240396  | -0.159356 | 1510.79 | 1666.07 | 1998.85 |
| H     | -1.328505 | -1.234449 | -1.075939 |         |         |         | H     | 1.024143  | 1.263365  | -1.176721 | 3057.85 | 3116.80 | 3175.66 |
| H     | -2.156060 | -1.713192 | 0.402637  |         |         |         | H     | 0.961233  | 2.058047  | 0.392348  | 3226.84 | 3597.41 | 3701.66 |
| H     | -2.824956 | -0.416902 | -0.599126 |         |         |         | H     | 2.494301  | 1.416086  | -0.210686 |         |         |         |
| TS9-3 |           |           |           |         |         |         | PC9-3 |           |           |           |         |         |         |
| N     | 1.597712  | -1.012586 | -0.306725 |         |         |         | N     | 1.548983  | -1.076011 | -0.324404 |         |         |         |
| H     | 0.694552  | -1.466271 | -0.327238 |         |         |         | H     | 0.603017  | -1.416524 | -0.424273 | 83.93   | 104.64  | 144.80  |
| C     | 1.517019  | 0.235658  | 0.432847  |         |         |         | C     | 1.569786  | 0.151029  | 0.459042  | 274.58  | 342.00  | 436.80  |
| H     | 1.165996  | 0.126369  | 1.464259  |         |         |         | H     | 1.105220  | 0.056954  | 1.447936  | 501.57  | 589.20  | 692.28  |
| H     | 2.521389  | 0.669681  | 0.485509  |         |         |         | H     | 2.618842  | 0.414014  | 0.640357  | 846.89  | 877.64  | 964.23  |
| H     | 2.253279  | -1.647950 | 0.120932  |         |         |         | H     | 2.089148  | -1.800499 | 0.122665  | 1108.52 | 1146.72 | 1174.33 |
| C     | 0.645829  | 1.207701  | -0.285188 |         |         |         | C     | 0.929709  | 1.262444  | -0.284390 | 1336.56 | 1420.72 | 1474.94 |
| H     | -0.641232 | 0.586197  | -0.177506 |         |         |         | H     | -0.867370 | 0.587008  | -0.172352 | 1496.91 | 1674.00 | 2428.19 |
| H     | 0.431413  | 2.149123  | 0.202836  |         |         |         | H     | 0.716062  | 2.191545  | 0.221065  | 3019.73 | 3034.77 | 3201.40 |
| H     | 0.737528  | 1.232207  | -1.363410 |         |         |         | H     | 0.988227  | 1.260884  | -1.362067 | 3310.17 | 3560.99 | 3642.37 |
| Cl    | -1.842588 | -0.189494 | 0.050338  |         |         |         | Cl    | -1.946647 | -0.131891 | 0.044093  |         |         |         |

Table S5.

Optimized geometries and frequencies of the involved species for the H-abstraction systems DMA + H/CH<sub>3</sub>/OH/HO<sub>2</sub>/NH<sub>2</sub>/O/C<sub>2</sub>H<sub>5</sub>/O<sub>2</sub>/Cl using the M08-HX/ma-TZVP method.

| Geometry                       |           |           |           | Frequency |         |              | Geometry |           |           |           | Frequency |         |         |
|--------------------------------|-----------|-----------|-----------|-----------|---------|--------------|----------|-----------|-----------|-----------|-----------|---------|---------|
| <b>Reactants</b>               |           |           |           |           |         |              |          |           |           |           |           |         |         |
| <b>DMA</b>                     |           |           |           |           |         |              |          |           |           |           |           |         |         |
| N                              | 0.026520  | 0.586877  | 0.000000  |           |         |              |          |           |           |           |           |         |         |
| H                              | -0.772481 | 1.207820  | 0.000000  | 233.81    | 270.86  | 385.85       |          |           |           |           |           |         |         |
| C                              | 0.026520  | -0.222526 | 1.201868  | 769.52    | 966.23  | 1031.20      |          |           |           |           |           |         |         |
| H                              | 0.966394  | -0.784821 | 1.257905  | 1097.24   | 1186.45 | 1201.06      |          |           |           |           |           |         |         |
| H                              | -0.031534 | 0.416904  | 2.087744  | 1266.19   | 1428.58 | 1456.54      |          |           |           |           |           |         |         |
| H                              | -0.800557 | -0.954905 | 1.242653  | 1464.20   | 1475.98 | 1483.69      |          |           |           |           |           |         |         |
| C                              | 0.026520  | -0.222526 | -1.201868 | 1504.92   | 1506.24 | 2951.88      |          |           |           |           |           |         |         |
| H                              | -0.031534 | 0.416904  | -2.087744 | 2953.11   | 3059.12 | 3061.99      |          |           |           |           |           |         |         |
| H                              | 0.966394  | -0.784821 | -1.257905 | 3116.99   | 3117.07 | 3572.07      |          |           |           |           |           |         |         |
| H                              | -0.800557 | -0.954905 | -1.242653 |           |         |              |          |           |           |           |           |         |         |
| <b>DMA-1</b>                   |           |           |           |           |         | <b>DMA-2</b> |          |           |           |           |           |         |         |
| N                              | 0.000066  | 0.641663  | 0.000000  |           |         |              | N        | 0.092419  | 0.479615  | -0.126718 |           |         |         |
| C                              | 0.000009  | -0.165643 | 1.182709  | 102.96    | 164.17  | 436.44       | H        | 0.117274  | 1.426561  | 0.217539  | 195.31    | 325.64  | 389.92  |
| H                              | 0.883372  | -0.826696 | 1.207852  | 936.30    | 949.03  | 1010.87      | C        | 1.243815  | -0.246856 | 0.072780  | 574.29    | 624.27  | 986.04  |
| H                              | 0.000274  | 0.458901  | 2.079675  | 1028.21   | 1206.19 | 1232.09      | H        | 1.218676  | -1.291046 | -0.216039 | 1039.37   | 1135.07 | 1254.69 |
| H                              | -0.883756 | -0.826156 | 1.208050  | 1385.68   | 1405.47 | 1449.32      | H        | 2.184296  | 0.288091  | 0.054187  | 1314.67   | 1436.16 | 1464.69 |
| C                              | 0.000009  | -0.165643 | -1.182709 | 1459.71   | 1477.06 | 1479.58      | C        | -1.179396 | -0.185722 | 0.032116  | 1472.32   | 1491.08 | 1540.57 |
| H                              | 0.000274  | 0.458901  | -2.079675 | 2955.62   | 2962.83 | 3011.04      | H        | -1.989840 | 0.475733  | -0.285365 | 2989.82   | 3075.66 | 3128.97 |
| H                              | 0.883372  | -0.826696 | -1.207852 | 3015.41   | 3117.42 | 3118.16      | H        | -1.198118 | -1.074371 | -0.608451 | 3171.62   | 3290.01 | 3634.08 |
| H                              | -0.883756 | -0.826156 | -1.208050 |           |         |              | H        | -1.367570 | -0.510489 | 1.067384  |           |         |         |
| <b>R1 DMA + H</b>              |           |           |           |           |         |              |          |           |           |           |           |         |         |
| <b>TS1-1</b>                   |           |           |           |           |         | <b>TS1-2</b> |          |           |           |           |           |         |         |
| N                              | 0.000001  | 0.352885  | -0.421430 |           |         |              | N        | 0.094092  | -0.609281 | -0.164567 |           |         |         |
| H                              | -0.000019 | 1.476067  | 0.023956  | -1752.31  |         |              | H        | 0.083412  | -0.949797 | -1.116159 | -1696.20  |         |         |
| H                              | -0.000128 | 2.217696  | 0.658388  | 189.05    | 228.35  | 357.40       | H        | -1.405989 | 1.975547  | -0.930039 | 186.82    | 213.74  | 297.95  |
| C                              | -1.198098 | -0.281331 | 0.087043  | 381.98    | 409.67  | 920.92       | C        | -1.144176 | -0.041750 | 0.212389  | 411.27    | 504.30  | 731.77  |
| H                              | -2.078645 | 0.303859  | -0.192145 | 986.06    | 1017.01 | 1080.12      | H        | -1.996383 | -0.673282 | -0.048747 | 983.67    | 1040.73 | 1112.21 |
| H                              | -1.285251 | -1.273590 | -0.375863 | 1164.98   | 1182.63 | 1227.13      | H        | -1.159839 | 0.229261  | 1.273306  | 1176.49   | 1230.31 | 1263.98 |
| H                              | -1.189625 | -0.424410 | 1.179555  | 1354.23   | 1410.98 | 1432.55      | H        | -1.335215 | 1.038742  | -0.374141 | 1286.76   | 1363.93 | 1373.13 |
| C                              | 1.198111  | -0.281302 | 0.087050  | 1454.52   | 1472.56 | 1474.52      | C        | 1.233848  | 0.247093  | 0.091629  | 1436.24   | 1464.06 | 1471.41 |
| H                              | 2.078636  | 0.303960  | -0.192054 | 1490.76   | 1618.54 | 2984.23      | H        | 2.153490  | -0.238900 | -0.244616 | 1487.77   | 1512.12 | 2973.54 |
| H                              | 1.189601  | -0.424462 | 1.179550  | 2985.41   | 3059.67 | 3059.98      | H        | 1.146789  | 1.230179  | -0.402220 | 3061.01   | 3074.31 | 3130.00 |
| H                              | 1.285350  | -1.273517 | -0.375933 | 3124.61   | 3124.65 |              | H        | 1.317056  | 0.421155  | 1.170479  | 3150.71   | 3597.36 |         |
| <b>R2 DMA + CH<sub>3</sub></b> |           |           |           |           |         |              |          |           |           |           |           |         |         |
| <b>TS2-1</b>                   |           |           |           |           |         | <b>TS2-2</b> |          |           |           |           |           |         |         |
| N                              | 0.446421  | 0.000002  | -0.560292 |           |         |              | N        | 1.118350  | 0.417552  | -0.370453 |           |         |         |
| H                              | -0.762475 | -0.000372 | -0.451654 | -1948.23  |         |              | H        | 1.021791  | 0.406020  | -1.376729 | -1810.81  |         |         |
| C                              | -2.033407 | -0.000262 | 0.069358  | 45.42     | 115.91  | 147.00       | H        | -2.222556 | -0.430431 | -0.070977 | 83.07     | 99.45   | 125.84  |
| C                              | 0.883084  | -1.193203 | 0.132614  | 202.80    | 240.69  | 404.01       | C        | 1.370144  | -0.906618 | 0.159673  | 240.73    | 347.24  | 376.22  |
| H                              | 0.444019  | -2.080586 | -0.333056 | 530.02    | 542.53  | 560.64       | H        | 2.192273  | -1.380167 | -0.383910 | 482.04    | 545.74  | 631.91  |
| H                              | 1.976000  | -1.272627 | 0.053843  | 945.66    | 1028.59 | 1081.88      | H        | 1.666264  | -0.820863 | 1.211740  | 742.73    | 984.15  | 1047.17 |
| H                              | 0.629327  | -1.190438 | 1.207548  | 1099.21   | 1143.66 | 1201.74      | H        | 0.486031  | -1.565881 | 0.113526  | 1084.82   | 1122.23 | 1176.29 |
| C                              | 0.882455  | 1.193466  | 0.132592  | 1225.71   | 1341.22 | 1405.10      | C        | 0.039188  | 1.090198  | 0.257325  | 1227.31   | 1279.63 | 1395.45 |
| H                              | 0.443114  | 2.080624  | -0.333251 | 1411.19   | 1422.85 | 1433.12      | H        | -0.164824 | 2.064632  | -0.193093 | 1405.06   | 1432.22 | 1435.94 |
| H                              | 0.628457  | 1.190690  | 1.207466  | 1457.98   | 1471.92 | 1474.72      | H        | -1.043209 | 0.419647  | 0.144518  | 1442.65   | 1465.91 | 1471.54 |
| H                              | 1.975354  | 1.273353  | 0.054065  | 1490.31   | 1490.70 | 2960.90      | H        | 0.196033  | 1.178730  | 1.337748  | 1486.78   | 1510.06 | 2970.38 |
| H                              | -2.480175 | -0.913120 | -0.320940 | 2961.34   | 3050.89 | 3050.96      | H        | -3.032093 | 0.284357  | -0.203490 | 3055.26   | 3066.05 | 3074.33 |
| H                              | -2.479165 | 0.913860  | -0.319135 | 3071.26   | 3111.46 | 3111.81      | H        | -1.974376 | -0.997623 | -0.966720 | 3125.49   | 3145.07 | 3219.08 |
| H                              | -1.892189 | -0.001408 | 1.149773  | 3211.50   | 3221.81 |              | H        | -2.297001 | -1.030614 | 0.833459  | 3226.01   | 3594.12 |         |
| <b>R3 DMA + OH</b>             |           |           |           |           |         |              |          |           |           |           |           |         |         |
| <b>RC3</b>                     |           |           |           |           |         |              |          |           |           |           |           |         |         |
| N                              | -0.390048 | 0.000032  | 0.431628  | 36.31     | 70.32   | 190.42       |          |           |           |           |           |         |         |
| H                              | -0.564013 | -0.000007 | 1.430111  | 211.35    | 277.81  | 391.81       |          |           |           |           |           |         |         |

|                          |           |           |           |                 |         |         |   |           |           |           |                 |         |         |
|--------------------------|-----------|-----------|-----------|-----------------|---------|---------|---|-----------|-----------|-----------|-----------------|---------|---------|
| C                        | -0.950356 | -1.207320 | -0.159589 | 576.63          | 712.38  | 875.73  |   |           |           |           |                 |         |         |
| H                        | -0.664047 | -1.255139 | -1.216085 | 960.01          | 1030.26 | 1095.83 |   |           |           |           |                 |         |         |
| H                        | -0.543841 | -2.091843 | 0.338281  | 1187.34         | 1205.04 | 1264.44 |   |           |           |           |                 |         |         |
| H                        | -2.050608 | -1.241883 | -0.106069 | 1429.51         | 1456.63 | 1461.22 |   |           |           |           |                 |         |         |
| C                        | -0.951033 | 1.207052  | -0.159622 | 1474.62         | 1485.68 | 1503.56 |   |           |           |           |                 |         |         |
| H                        | -0.545043 | 2.091816  | 0.338246  | 1505.86         | 2986.63 | 2986.90 |   |           |           |           |                 |         |         |
| H                        | -0.664720 | 1.255022  | -1.216110 | 3078.77         | 3081.72 | 3129.27 |   |           |           |           |                 |         |         |
| H                        | -2.051307 | 1.240982  | -0.106129 | 3129.31         | 3443.41 | 3567.39 |   |           |           |           |                 |         |         |
| O                        | 2.465414  | 0.000269  | -0.086211 |                 |         |         |   |           |           |           |                 |         |         |
| H                        | 1.498940  | 0.000286  | 0.121316  |                 |         |         |   |           |           |           |                 |         |         |
| TS3-1                    |           |           |           | TS3-2           |         |         |   |           |           |           |                 |         |         |
| N                        | -0.390301 | 0.016511  | -0.514086 | -375.05         |         |         | N | 1.135391  | 0.366048  | -0.350319 | -465.41         |         |         |
| H                        | 0.569295  | -0.026432 | -0.888422 | 108.44          | 119.16  | 179.31  | H | 1.074696  | 0.366328  | -1.359706 | 87.69           | 95.44   | 146.82  |
| C                        | -0.855993 | -1.185669 | 0.123515  | 198.96          | 212.17  | 322.03  | C | 0.086027  | 1.132454  | 0.234121  | 247.87          | 303.65  | 393.73  |
| H                        | -1.952329 | -1.222531 | 0.081217  | 463.08          | 606.03  | 961.70  | H | 0.237219  | 1.222439  | 1.316405  | 562.83          | 732.32  | 970.29  |
| H                        | -0.462058 | -2.062610 | -0.396008 | 1046.25         | 1096.55 | 1140.20 | H | 0.023603  | 2.130260  | -0.209531 | 1029.96         | 1053.79 | 1129.24 |
| H                        | -0.569649 | -1.239767 | 1.188204  | 1217.82         | 1253.45 | 1424.74 | H | -0.929858 | 0.636458  | 0.081677  | 1215.80         | 1264.98 | 1393.73 |
| C                        | -0.720313 | 1.246579  | 0.157724  | 1441.87         | 1455.31 | 1467.15 | C | 1.222134  | -0.981846 | 0.173149  | 1433.49         | 1441.56 | 1451.13 |
| H                        | -0.224950 | 2.082564  | -0.339255 | 1471.14         | 1496.21 | 1504.99 | H | 2.008636  | -1.536874 | -0.345168 | 1471.96         | 1492.35 | 1511.38 |
| H                        | -1.806451 | 1.402656  | 0.117827  | 2964.32         | 2991.25 | 3051.41 | H | 1.484390  | -0.938516 | 1.236825  | 2090.22         | 2974.74 | 3053.15 |
| H                        | -0.413028 | 1.239800  | 1.215112  | 3059.75         | 3120.59 | 3137.89 | H | 0.268915  | -1.529846 | 0.077916  | 3069.34         | 3123.92 | 3128.35 |
| O                        | 1.905875  | 0.007665  | 0.033328  | 3151.14 3824.29 |         |         | O | -2.177575 | -0.427472 | -0.187428 | 3597.05 3803.13 |         |         |
| H                        | 1.802115  | -0.716035 | 0.665868  |                 |         |         | H | -2.543707 | -0.396458 | 0.709620  |                 |         |         |
| R4 DMA + HO <sub>2</sub> |           |           |           |                 |         |         |   |           |           |           |                 |         |         |
| RC4                      |           |           |           |                 |         |         |   |           |           |           |                 |         |         |
| N                        | 0.920743  | 0.000202  | 0.540745  |                 |         |         |   |           |           |           |                 |         |         |
| H                        | 1.479722  | 0.000506  | 1.386544  | 64.28           | 84.53   | 125.26  |   |           |           |           |                 |         |         |
| O                        | -1.863203 | -0.000939 | -0.684879 | 184.60          | 211.52  | 241.58  |   |           |           |           |                 |         |         |
| O                        | -1.774378 | 0.001146  | 0.614929  | 306.23          | 402.25  | 858.92  |   |           |           |           |                 |         |         |
| H                        | -0.783376 | 0.001085  | 0.790135  | 890.67          | 953.96  | 1033.19 |   |           |           |           |                 |         |         |
| C                        | 1.201131  | 1.207773  | -0.232133 | 1095.43         | 1179.19 | 1214.94 |   |           |           |           |                 |         |         |
| H                        | 0.519087  | 1.239085  | -1.087851 | 1267.26         | 1290.56 | 1427.79 |   |           |           |           |                 |         |         |
| H                        | 1.020811  | 2.094970  | 0.381167  | 1455.29         | 1455.63 | 1477.63 |   |           |           |           |                 |         |         |
| H                        | 2.235561  | 1.237559  | -0.607358 | 1488.83         | 1500.13 | 1501.55 |   |           |           |           |                 |         |         |
| C                        | 1.200580  | -1.208214 | -0.230962 | 1651.13         | 2973.57 | 2999.42 |   |           |           |           |                 |         |         |
| H                        | 2.234934  | -1.238745 | -0.606348 | 3012.24         | 3090.85 | 3093.59 |   |           |           |           |                 |         |         |
| H                        | 1.020052  | -2.094749 | 0.383231  | 3131.94         | 3132.17 | 3558.06 |   |           |           |           |                 |         |         |
| H                        | 0.518403  | -1.240136 | -1.086559 |                 |         |         |   |           |           |           |                 |         |         |
| TS4-1                    |           |           |           | PC4-1           |         |         |   |           |           |           |                 |         |         |
| N                        | 0.908972  | -0.014593 | -0.574596 | -2165.95        |         |         | N | -0.899895 | -0.172590 | -0.041470 |                 |         |         |
| H                        | -0.273855 | -0.042806 | -0.872940 | 68.75           | 131.18  | 168.95  | H | 0.862663  | -0.770313 | -0.294404 | 26.12           | 71.39   | 81.25   |
| O                        | -1.471323 | -0.075019 | -0.723324 | 183.15          | 213.02  | 353.95  | O | 1.835066  | -0.789015 | -0.396486 | 99.26           | 125.62  | 181.72  |
| O                        | -1.698264 | -0.047035 | 0.648139  | 396.52          | 422.35  | 626.95  | O | 2.195609  | 0.389306  | 0.312971  | 221.77          | 293.50  | 445.61  |
| H                        | -2.012739 | 0.850585  | 0.800524  | 957.93          | 1023.92 | 1026.90 | H | 2.627223  | 0.027586  | 1.092463  | 734.69          | 957.82  | 970.17  |
| C                        | 1.156074  | 1.202473  | 0.147179  | 1042.21         | 1062.72 | 1190.31 | C | -2.183685 | -0.758594 | 0.193759  | 1009.98         | 1027.90 | 1030.06 |
| H                        | 2.215081  | 1.256700  | 0.435311  | 1231.19         | 1349.19 | 1394.34 | H | -2.874028 | -0.523851 | -0.633321 | 1217.27         | 1241.03 | 1384.54 |
| H                        | 0.906285  | 2.070494  | -0.467957 | 1402.20         | 1411.99 | 1447.38 | H | -2.106002 | -1.843463 | 0.295562  | 1385.32         | 1405.46 | 1448.45 |
| H                        | 0.564865  | 1.232621  | 1.081510  | 1461.82         | 1471.78 | 1488.86 | H | -2.638361 | -0.342304 | 1.107791  | 1457.76         | 1475.63 | 1482.84 |
| C                        | 1.161832  | -1.177959 | 0.233060  | 1572.73         | 2949.54 | 2965.53 | C | -0.958102 | 1.251871  | -0.184264 | 1568.11         | 2967.03 | 2974.15 |
| H                        | 0.505799  | -1.179457 | 1.122295  | 3047.26         | 3056.20 | 3129.41 | H | -1.426629 | 1.713310  | 0.700627  | 3023.38         | 3029.07 | 3130.49 |
| H                        | 0.979131  | -2.087632 | -0.343143 | 3137.44 3837.96 |         |         | H | 0.045279  | 1.662184  | -0.317636 | 3138.18         | 3583.32 | 3869.96 |
| H                        | 2.201890  | -1.169006 | 0.586625  |                 |         |         |   |           |           |           |                 |         |         |
| TS4-2                    |           |           |           | PC4-2           |         |         |   |           |           |           |                 |         |         |
| N                        | 1.219121  | 0.135016  | 0.553986  | -1440.95        |         |         | N | -1.110855 | 0.179771  | -0.537201 | 57.07           | 88.13   | 142.86  |
| H                        | 0.777994  | -0.179485 | 1.407449  | 103.69          | 128.09  | 151.86  | H | -0.384691 | -0.031628 | -1.207910 | 146.73          | 210.87  | 225.24  |
| O                        | -1.606224 | 0.222155  | -0.650354 | 198.16          | 320.34  | 393.25  | O | 1.611940  | -0.295635 | 0.779910  | 268.67          | 406.14  | 409.28  |
| O                        | -1.587008 | -0.646346 | 0.430377  | 445.32          | 505.95  | 603.19  | O | 1.851395  | -0.157754 | -0.612534 | 610.37          | 698.67  | 731.68  |
| H                        | -2.226442 | -0.261602 | 1.039545  | 699.80          | 988.76  | 1049.94 | H | 2.699681  | 0.296108  | -0.628114 | 990.18          | 1028.41 | 1047.21 |
| C                        | 0.622078  | 1.271153  | 0.008572  | 1065.22         | 1121.92 | 1180.32 | C | -0.886061 | 1.303039  | 0.214163  | 1136.39         | 1256.55 | 1330.79 |
| H                        | 1.151430  | 1.636642  | -0.876511 | 1250.04         | 1293.74 | 1316.68 | H | -1.606587 | 1.519979  | 0.996234  | 1382.92         | 1435.59 | 1466.61 |
| H                        | -0.523868 | 0.924987  | -0.425123 | 1392.93         | 1435.38 | 1459.84 | H | 0.884526  | 0.343222  | 0.913345  | 1474.72         | 1488.63 | 1513.43 |

|                                |           |           |           |                 |         |         |   |           |           |           |         |         |         |
|--------------------------------|-----------|-----------|-----------|-----------------|---------|---------|---|-----------|-----------|-----------|---------|---------|---------|
| H                              | 0.440607  | 2.058211  | 0.743911  | 1472.83         | 1485.69 | 1518.05 | H | -0.383380 | 2.129101  | -0.277037 | 1555.42 | 2996.68 | 3084.83 |
| C                              | 1.490533  | -0.947174 | -0.369446 | 1526.59         | 3008.65 | 3067.82 | C | -1.702373 | -0.978031 | 0.094064  | 3132.96 | 3151.84 | 3266.54 |
| H                              | 2.004943  | -1.759124 | 0.150273  | 3088.57         | 3136.10 | 3159.61 | H | -1.987080 | -1.710895 | -0.664886 | 3587.57 | 3614.68 | 3866.01 |
| H                              | 0.567344  | -1.335820 | -0.824934 | 3610.68 3834.86 |         |         | H | -1.016653 | -1.457018 | 0.809799  |         |         |         |
| H                              | 2.144338  | -0.579270 | -1.167456 |                 |         |         | H | -2.605911 | -0.670200 | 0.630607  |         |         |         |
| <b>R5 DMA + NH<sub>2</sub></b> |           |           |           |                 |         |         |   |           |           |           |         |         |         |
| RC5                            |           |           |           |                 |         |         |   |           |           |           |         |         |         |
| N                              | 0.677443  | 0.000004  | 0.577226  |                 |         |         |   |           |           |           |         |         |         |
| H                              | 1.367020  | 0.000037  | 1.318154  | 39.38           | 88.48   | 129.23  |   |           |           |           |         |         |         |
| N                              | -2.302576 | 0.000004  | -0.129956 | 180.66          | 237.83  | 282.05  |   |           |           |           |         |         |         |
| H                              | -3.135117 | -0.000364 | 0.466899  | 317.54          | 366.96  | 396.04  |   |           |           |           |         |         |         |
| H                              | -1.503700 | -0.000038 | 0.521411  | 811.91          | 960.63  | 1035.05 |   |           |           |           |         |         |         |
| C                              | 0.808017  | 1.202110  | -0.229465 | 1098.31         | 1188.43 | 1196.80 |   |           |           |           |         |         |         |
| H                              | -0.027918 | 1.244276  | -0.938431 | 1267.84         | 1428.20 | 1456.55 |   |           |           |           |         |         |         |
| H                              | 0.757298  | 2.090594  | 0.407008  | 1460.43         | 1477.61 | 1485.21 |   |           |           |           |         |         |         |
| H                              | 1.745793  | 1.237393  | -0.810379 | 1507.23         | 1507.76 | 1540.83 |   |           |           |           |         |         |         |
| C                              | 0.808135  | -1.202076 | -0.229483 | 2976.79         | 2977.52 | 3073.53 |   |           |           |           |         |         |         |
| H                              | 1.745743  | -1.237085 | -0.810688 | 3076.54         | 3125.50 | 3125.59 |   |           |           |           |         |         |         |
| H                              | 0.757894  | -2.090557 | 0.407031  | 3358.55         | 3487.09 | 3567.83 |   |           |           |           |         |         |         |
| H                              | -0.027994 | -1.244514 | -0.938207 |                 |         |         |   |           |           |           |         |         |         |
| TSS-1                          |           |           |           | PC5-1           |         |         |   |           |           |           |         |         |         |
| N                              | -0.377528 | 0.000386  | -0.512493 | -1813.87        |         |         | N | -0.541657 | -0.250273 | -0.005527 |         |         |         |
| H                              | 0.790800  | -0.000825 | -0.560377 | 52.18           | 135.82  | 169.16  | H | 1.667821  | -0.619600 | -0.004394 | 60.94   | 95.54   | 99.47   |
| N                              | 2.013967  | -0.002019 | -0.043362 | 210.48          | 232.29  | 394.03  | N | 2.605052  | -0.224374 | 0.000952  | 135.30  | 144.29  | 156.99  |
| H                              | 2.022075  | -0.801825 | 0.592086  | 533.28          | 630.34  | 747.33  | H | 3.097075  | -0.568486 | -0.813777 | 212.13  | 357.18  | 439.52  |
| H                              | 2.034339  | 0.818709  | 0.564570  | 955.87          | 1040.13 | 1082.39 | H | 3.088906  | -0.571406 | 0.819331  | 949.65  | 952.14  | 1009.59 |
| C                              | -0.856525 | -1.200140 | 0.128480  | 1132.91         | 1217.71 | 1234.00 | C | -0.456834 | 1.180681  | 0.000575  | 1028.59 | 1060.29 | 1211.52 |
| H                              | -1.935701 | -1.300950 | -0.054490 | 1369.49         | 1413.17 | 1433.28 | H | -0.965813 | 1.596200  | 0.886995  | 1235.46 | 1384.14 | 1403.58 |
| H                              | -0.358357 | -2.076048 | -0.297216 | 1457.29         | 1472.38 | 1473.32 | H | 0.588798  | 1.499496  | -0.001205 | 1449.31 | 1461.44 | 1477.86 |
| H                              | -0.710625 | -1.197445 | 1.222772  | 1491.66         | 1560.22 | 1607.18 | H | -0.970905 | 1.603351  | -0.879507 | 1483.31 | 1658.60 | 1678.43 |
| C                              | -0.857979 | 1.199754  | 0.129558  | 2963.92         | 2964.48 | 3044.98 | C | -1.898003 | -0.707742 | 0.001514  | 2958.68 | 2966.85 | 3014.17 |
| H                              | -0.708666 | 1.197780  | 1.223352  | 3045.54         | 3116.27 | 3116.89 | H | -2.447021 | -0.319062 | -0.872850 | 3019.92 | 3121.78 | 3126.80 |
| H                              | -0.363886 | 2.077137  | -0.297856 | 3452.14 3547.06 |         |         | H | -1.942694 | -1.799693 | -0.008128 | 3484.55 | 3615.81 | 3655.97 |
| H                              | -1.938027 | 1.297217  | -0.050081 |                 |         |         |   |           |           |           |         |         |         |
| TSS-2                          |           |           |           | PC5-2           |         |         |   |           |           |           |         |         |         |
| N                              | -1.082525 | 0.442784  | -0.360508 | -1108.17        |         |         | N | 0.639663  | 0.019427  | 0.377194  |         |         |         |
| H                              | -0.986402 | 0.449807  | -1.367034 | 100.07          | 128.29  | 150.33  | H | -0.247093 | -0.442129 | 0.546480  | 66.61   | 82.66   | 106.08  |
| N                              | 2.120744  | -0.550620 | -0.158618 | 241.59          | 375.65  | 396.94  | N | -2.380795 | -0.339096 | -0.027629 | 157.02  | 189.86  | 233.35  |
| H                              | 2.406592  | -0.734158 | 0.806945  | 573.22          | 696.52  | 765.72  | H | -2.863115 | -1.118739 | -0.457381 | 274.32  | 377.32  | 408.05  |
| H                              | 2.781624  | 0.158518  | -0.487591 | 827.61          | 989.94  | 1049.47 | H | -3.051522 | 0.158647  | 0.544801  | 623.71  | 780.94  | 992.12  |
| C                              | -1.383429 | -0.885444 | 0.138275  | 1126.86         | 1215.45 | 1258.81 | C | 1.701314  | -0.822557 | -0.113560 | 1048.95 | 1072.34 | 1132.43 |
| H                              | -1.668430 | -0.814040 | 1.194384  | 1297.53         | 1369.76 | 1434.21 | H | 2.660043  | -0.303531 | 0.000191  | 1256.21 | 1335.19 | 1435.40 |
| H                              | -2.228781 | -1.308497 | -0.410900 | 1454.30         | 1467.61 | 1473.74 | H | 1.745784  | -1.745829 | 0.470376  | 1470.23 | 1474.01 | 1493.34 |
| H                              | -0.522654 | -1.568696 | 0.057857  | 1489.84         | 1513.50 | 1548.46 | H | 1.584208  | -1.083229 | -1.178243 | 1565.06 | 1657.62 | 1664.88 |
| C                              | 0.020412  | 1.058497  | 0.277915  | 2987.60         | 3054.51 | 3072.83 | C | 0.519445  | 1.290337  | -0.122702 | 2977.64 | 3066.40 | 3125.10 |
| H                              | 1.015115  | 0.364624  | 0.128252  | 3127.41         | 3138.65 | 3433.74 | H | -2.077974 | 0.286398  | -0.767579 | 3153.95 | 3266.66 | 3507.19 |
| H                              | 0.249004  | 2.040147  | -0.145396 | 3531.79 3595.98 |         |         | H | -0.318397 | 1.881221  | 0.229026  | 3559.04 | 3633.16 | 3652.49 |
| H                              | -0.135501 | 1.128823  | 1.360229  |                 |         |         |   |           |           |           |         |         |         |
| <b>R6 DMA + O</b>              |           |           |           |                 |         |         |   |           |           |           |         |         |         |
| RC6                            |           |           |           |                 |         |         |   |           |           |           |         |         |         |
| N                              | 0.268292  | 0.020425  | -0.478200 |                 |         |         |   |           |           |           |         |         |         |
| H                              | 0.435904  | 0.057972  | -1.473363 | 87.06           | 120.81  | 185.02  |   |           |           |           |         |         |         |
| C                              | 0.968924  | -1.058217 | 0.176614  | 207.04          | 276.60  | 379.46  |   |           |           |           |         |         |         |
| H                              | 0.549966  | -1.189843 | 1.180518  | 690.74          | 963.73  | 1036.98 |   |           |           |           |         |         |         |
| H                              | 0.822090  | -1.990446 | -0.375121 | 1094.30         | 1176.11 | 1214.11 |   |           |           |           |         |         |         |
| H                              | 2.051933  | -0.870943 | 0.275785  | 1264.23         | 1427.03 | 1450.96 |   |           |           |           |         |         |         |
| C                              | 0.410878  | 1.303861  | 0.166275  | 1459.79         | 1472.63 | 1479.32 |   |           |           |           |         |         |         |
| H                              | -0.139106 | 2.065714  | -0.392529 | 1497.67         | 1503.42 | 2971.24 |   |           |           |           |         |         |         |
| H                              | -0.021683 | 1.242393  | 1.171993  | 2973.64         | 3068.83 | 3077.82 |   |           |           |           |         |         |         |
| H                              | 1.462293  | 1.623337  | 0.265419  | 3125.71         | 3129.96 | 3616.27 |   |           |           |           |         |         |         |
| O                              | -1.914781 | -0.319378 | 0.079670  |                 |         |         |   |           |           |           |         |         |         |





|                                     |           |           |           |         |         |         |    |           |           |           |         |         |         |
|-------------------------------------|-----------|-----------|-----------|---------|---------|---------|----|-----------|-----------|-----------|---------|---------|---------|
| H                                   | 2.089840  | -1.656025 | 0.210031  | 489.95  | 566.12  | 686.30  | H  | 1.918104  | -1.826094 | 0.234328  | 704.98  | 794.01  | 990.54  |
| H                                   | 2.201653  | -0.485966 | -1.119773 | 989.61  | 1049.63 | 1057.89 | H  | 2.198429  | -0.686185 | -1.095928 | 1048.54 | 1135.31 | 1256.82 |
| H                                   | 0.683084  | -1.380289 | -0.849801 | 1135.00 | 1176.91 | 1263.68 | H  | 0.579657  | -1.392556 | -0.859689 | 1290.03 | 1332.63 | 1435.86 |
| H                                   | 0.687607  | -0.154033 | 1.388887  | 1312.95 | 1368.92 | 1435.92 | H  | 0.650932  | -0.151966 | 1.358863  | 1467.60 | 1474.63 | 1485.17 |
| H                                   | -0.760152 | 0.821433  | -0.426495 | 1463.46 | 1474.79 | 1486.81 | H  | -0.945449 | 0.734050  | -0.538518 | 1549.56 | 1556.65 | 3003.03 |
| H                                   | 0.302366  | 2.072405  | 0.695458  | 1543.94 | 1584.37 | 3010.82 | H  | 0.574380  | 2.102950  | 0.670759  | 3055.77 | 3091.31 | 3135.73 |
| H                                   | 1.032688  | 1.632231  | -0.933671 | 3091.07 | 3094.37 | 3138.26 | H  | 1.349834  | 1.576616  | -0.939064 | 3139.31 | 3249.65 | 3621.65 |
| O                                   | -1.728269 | 0.168992  | -0.482813 | 3193.28 | 3620.34 |         | O  | -1.792326 | 0.200325  | -0.548151 |         |         |         |
| O                                   | -1.593271 | -0.709770 | 0.426986  |         |         |         | O  | -1.748643 | -0.554533 | 0.506395  |         |         |         |
| <b>R9 DMA + CI (M05-2X/ma-ZTVP)</b> |           |           |           |         |         |         |    |           |           |           |         |         |         |
| <b>R9</b>                           |           |           |           |         |         |         |    |           |           |           |         |         |         |
| C                                   | 0.950272  | 1.502196  | -0.246888 |         |         |         |    |           |           |           |         |         |         |
| H                                   | 0.726230  | 1.401154  | -1.305263 | 152.11  | 171.50  | 201.59  |    |           |           |           |         |         |         |
| H                                   | 1.965073  | 1.890144  | -0.126730 | 222.28  | 369.15  | 396.30  |    |           |           |           |         |         |         |
| H                                   | 0.236332  | 2.188705  | 0.194512  | 706.50  | 952.96  | 1059.37 |    |           |           |           |         |         |         |
| N                                   | 0.809446  | 0.204498  | 0.372872  | 1095.08 | 1185.16 | 1213.24 |    |           |           |           |         |         |         |
| H                                   | 0.736143  | 0.221308  | 1.376742  | 1283.19 | 1457.48 | 1476.32 |    |           |           |           |         |         |         |
| C                                   | 1.622637  | -0.865612 | -0.157905 | 1480.75 | 1503.99 | 1515.88 |    |           |           |           |         |         |         |
| H                                   | 1.366447  | -1.792086 | 0.343942  | 1521.52 | 1522.72 | 3065.76 |    |           |           |           |         |         |         |
| H                                   | 1.400033  | -0.970846 | -1.216165 | 3068.10 | 3160.77 | 3162.44 |    |           |           |           |         |         |         |
| H                                   | 2.687430  | -0.653869 | -0.030812 | 3208.36 | 3208.77 | 3636.32 |    |           |           |           |         |         |         |
| CI                                  | -1.412256 | -0.442464 | -0.039784 |         |         |         |    |           |           |           |         |         |         |
| <b>TS9-1</b>                        |           |           |           |         |         |         |    |           |           |           |         |         |         |
| N                                   | 0.818002  | -0.000021 | -0.283136 |         |         |         | N  | 0.850857  | -0.000118 | -0.001166 |         |         |         |
| H                                   | -0.452142 | -0.000118 | -0.318819 | -763.61 |         |         | H  | -0.737188 | -0.000280 | -0.000708 | 54.40   | 63.37   | 76.52   |
| C                                   | 1.477477  | -1.218662 | 0.067025  | 27.45   | 62.38   | 74.24   | C  | 1.624631  | -1.202396 | 0.000143  | 142.25  | 161.50  | 451.69  |
| H                                   | 1.667915  | -1.245398 | 1.143443  | 138.43  | 368.41  | 492.41  | H  | 2.268966  | -1.234417 | 0.884211  | 793.22  | 935.14  | 962.92  |
| H                                   | 0.857319  | -2.062916 | -0.213203 | 901.62  | 992.38  | 1034.31 | H  | 0.971662  | -2.068906 | -0.004301 | 1006.55 | 1030.69 | 1044.81 |
| H                                   | 2.442846  | -1.272091 | -0.441110 | 1046.19 | 1104.17 | 1175.05 | H  | 2.278139  | -1.231422 | -0.877183 | 1246.93 | 1270.69 | 1419.46 |
| C                                   | 1.477198  | 1.218764  | 0.067067  | 1261.98 | 1353.90 | 1424.66 | C  | 1.623708  | 1.202762  | 0.000165  | 1438.21 | 1484.94 | 1491.71 |
| H                                   | 0.855446  | 2.062781  | -0.210328 | 1448.15 | 1480.55 | 1488.70 | H  | 0.970031  | 2.068748  | -0.002869 | 1512.89 | 1513.26 | 1840.07 |
| H                                   | 1.670906  | 1.244227  | 1.142915  | 1505.93 | 1517.81 | 3054.91 | H  | 2.269178  | 1.234649  | 0.883393  | 3038.87 | 3046.15 | 3084.54 |
| H                                   | 2.440983  | 1.273837  | -0.443934 | 3061.35 | 3106.61 | 3112.52 | H  | 2.276018  | 1.232906  | -0.878007 | 3091.47 | 3188.40 | 3189.10 |
| CI                                  | -1.937490 | -0.000046 | 0.030496  | 3203.05 | 3203.55 |         | CI | -2.102520 | -0.000156 | 0.000104  |         |         |         |
| <b>TS9-2</b>                        |           |           |           |         |         |         |    |           |           |           |         |         |         |
| C                                   | 0.666731  | 1.009101  | -0.168400 |         |         |         | C  | 0.766895  | 1.211687  | 0.252604  |         |         |         |
| H                                   | 0.174700  | 0.589997  | -1.048158 | -134.19 |         |         | H  | 0.597840  | 2.152762  | -0.247679 | 73.32   | 96.24   | 102.00  |
| H                                   | 1.334425  | 1.806988  | -0.520342 | 29.05   | 73.15   | 230.21  | H  | 0.893102  | 1.225615  | 1.325803  | 198.93  | 389.55  | 426.28  |
| H                                   | -0.090125 | 1.457928  | 0.472714  | 271.32  | 379.39  | 761.18  | H  | -0.804816 | 0.523247  | 0.164212  | 640.25  | 732.43  | 808.75  |
| N                                   | 1.350490  | -0.051540 | 0.540904  | 965.05  | 1048.41 | 1114.70 | N  | 1.518196  | 0.288403  | -0.422287 | 872.42  | 991.55  | 1066.81 |
| H                                   | 1.703021  | 0.291224  | 1.420968  | 1198.77 | 1202.96 | 1283.11 | H  | 1.406183  | 0.285231  | -1.421845 | 1159.01 | 1269.31 | 1334.45 |
| C                                   | 2.429624  | -0.624724 | -0.241544 | 1454.15 | 1485.89 | 1490.40 | C  | 1.736499  | -1.013759 | 0.176566  | 1467.73 | 1493.18 | 1513.48 |
| H                                   | 2.948031  | -1.380212 | 0.342754  | 1509.47 | 1520.78 | 1535.37 | H  | 2.486760  | -1.553276 | -0.392674 | 1526.07 | 1568.08 | 1753.33 |
| H                                   | 2.010155  | -1.109756 | -1.121772 | 1539.67 | 3003.61 | 3015.29 | H  | 2.104183  | -0.873136 | 1.190021  | 3082.89 | 3153.65 | 3186.15 |
| H                                   | 3.159208  | 0.120351  | -0.583298 | 3078.38 | 3120.80 | 3134.27 | H  | 0.816553  | -1.599307 | 0.214003  | 3192.09 | 3295.94 | 3642.02 |
| CI                                  | -2.310057 | -0.218942 | -0.017031 | 3170.39 | 3592.67 |         | CI | -1.949855 | -0.198089 | -0.026521 |         |         |         |





| $T / K$ | $k_{7-3}^{EA}$ | $k_{8-1}^{EA}$ | $k_{8-2}^{EA}$ | $k_{8-3}^{EA}$ | $k_{9-1}^{EA}$ | $k_{9-2}^{EA}$ | $k_{9-3}^{EA}$ |  |  |  |
|---------|----------------|----------------|----------------|----------------|----------------|----------------|----------------|--|--|--|
| 200     | 2.887E-04      | 2.466E-37      | 1.055E-26      | 2.912E-42      | 3.009E+13      | 3.009E+13      | 3.009E+13      |  |  |  |
| 250     | 3.609E-02      | 7.298E-28      | 1.972E-19      | 8.561E-32      | 2.119E+13      | 2.119E+13      | 2.117E+13      |  |  |  |
| 300     | 1.179E+00      | 1.083E-21      | 1.070E-14      | 5.657E-25      | 1.700E+13      | 1.700E+13      | 1.694E+13      |  |  |  |
| 350     | 2.205E+01      | 6.784E-17      | 5.479E-11      | 1.229E-19      | 1.497E+13      | 1.496E+13      | 1.485E+13      |  |  |  |
| 400     | 2.143E+02      | 2.009E-13      | 2.684E-08      | 9.040E-16      | 1.397E+13      | 1.397E+13      | 1.377E+13      |  |  |  |
| 450     | 1.423E+03      | 1.055E-10      | 3.470E-06      | 9.892E-13      | 1.350E+13      | 1.349E+13      | 1.319E+13      |  |  |  |
| 500     | 7.094E+03      | 1.629E-08      | 1.768E-04      | 2.825E-10      | 1.329E+13      | 1.328E+13      | 1.287E+13      |  |  |  |
| 550     | 2.837E+04      | 1.053E-06      | 4.562E-03      | 3.015E-08      | 1.325E+13      | 1.323E+13      | 1.270E+13      |  |  |  |
| 600     | 9.516E+04      | 3.503E-05      | 7.047E-02      | 1.530E-06      | 1.329E+13      | 1.325E+13      | 1.263E+13      |  |  |  |
| 650     | 2.767E+05      | 6.977E-04      | 7.319E-01      | 4.366E-05      | 1.340E+13      | 1.335E+13      | 1.263E+13      |  |  |  |
| 700     | 7.145E+05      | 9.269E-03      | 5.561E+00      | 7.899E-04      | 1.356E+13      | 1.348E+13      | 1.270E+13      |  |  |  |
| 750     | 1.673E+06      | 8.893E-02      | 3.283E+01      | 9.907E-03      | 1.377E+13      | 1.366E+13      | 1.282E+13      |  |  |  |
| 800     | 3.600E+06      | 6.541E-01      | 1.578E+02      | 9.207E-02      | 1.401E+13      | 1.387E+13      | 1.299E+13      |  |  |  |
| 850     | 7.214E+06      | 3.860E+00      | 6.401E+02      | 6.674E-01      | 1.429E+13      | 1.412E+13      | 1.320E+13      |  |  |  |
| 900     | 1.362E+07      | 1.894E+01      | 2.250E+03      | 3.928E+00      | 1.459E+13      | 1.438E+13      | 1.344E+13      |  |  |  |
| 950     | 2.433E+07      | 7.946E+01      | 7.009E+03      | 1.938E+01      | 1.493E+13      | 1.467E+13      | 1.372E+13      |  |  |  |
| 1000    | 4.151E+07      | 2.919E+02      | 1.970E+04      | 8.228E+01      | 1.528E+13      | 1.498E+13      | 1.403E+13      |  |  |  |
| 1100    | 1.075E+08      | 2.829E+03      | 1.205E+05      | 1.021E+03      | 1.607E+13      | 1.566E+13      | 1.473E+13      |  |  |  |
| 1200    | 2.448E+08      | 1.929E+04      | 5.609E+05      | 8.526E+03      | 1.694E+13      | 1.642E+13      | 1.553E+13      |  |  |  |
| 1300    | 5.037E+08      | 1.000E+05      | 2.112E+06      | 5.232E+04      | 1.792E+13      | 1.728E+13      | 1.644E+13      |  |  |  |
| 1400    | 9.513E+08      | 4.174E+05      | 6.722E+06      | 2.515E+05      | 1.900E+13      | 1.823E+13      | 1.746E+13      |  |  |  |
| 1500    | 1.680E+09      | 1.462E+06      | 1.867E+07      | 9.937E+05      | 2.020E+13      | 1.929E+13      | 1.859E+13      |  |  |  |
| 1600    | 2.801E+09      | 4.433E+06      | 4.633E+07      | 3.340E+06      | 2.152E+13      | 2.046E+13      | 1.984E+13      |  |  |  |
| 1700    | 4.440E+09      | 1.192E+07      | 1.047E+08      | 9.819E+06      | 2.295E+13      | 2.174E+13      | 2.121E+13      |  |  |  |
| 1800    | 6.769E+09      | 2.899E+07      | 2.186E+08      | 2.581E+07      | 2.450E+13      | 2.312E+13      | 2.268E+13      |  |  |  |
| 1900    | 9.958E+09      | 6.472E+07      | 4.267E+08      | 6.169E+07      | 2.616E+13      | 2.461E+13      | 2.428E+13      |  |  |  |
| 2000    | 1.419E+10      | 1.342E+08      | 7.863E+08      | 1.359E+08      | 2.794E+13      | 2.621E+13      | 2.599E+13      |  |  |  |
